# Supplementary material for: Photostable orange-red fluorescent unsymmetrical diketopyrrolopyrrole–BF2 hybrids
Source: Royal Society of Chemistry journal article supplement (doi:10.1039/d0tc01202e), 2020-01-01
Supplement: d0tc01202e1.pdf [file d0tc01202e1.pdf]

## Supporting Information

### Photostable Orange-Red Fluorescent Unsymmetrical Diketopyrrolopyrrole-BF<sub>2</sub> Hybrids

David C. Young,<sup>a</sup> Mariusz Tasior,<sup>a</sup> Adèle D. Laurent,<sup>b</sup> Łukasz Dobrzycki,<sup>c</sup> Michał K. Cyrański,<sup>\*c</sup> Nikolai Tkachenko,<sup>\*c</sup> Denis Jacquemin,<sup>\*b</sup> Daniel T. Gryko<sup>\*a</sup>

<sup>a</sup>*Institute of Organic Chemistry, Polish Academy of Sciences, Kasprzaka 44–52, 01-224, Warsaw, Poland.*

<sup>b</sup>*Université de Nantes, CNRS, CEISAM UMR 6230, F-44000 Nantes, France.*

<sup>c</sup>*Chemistry and Advanced Materials Group, Faculty of Engineering and Natural Sciences, Tampere University, Korkeakoulunkatu 8, FI-33720 Tampere, Finland.*

Email: dtgryko@icho.edu.pl

---

#### Table of Contents

|             |                                    |     |
|-------------|------------------------------------|-----|
| Section S1  | General Information                | S2  |
| Section S2  | Experimental Procedures            | S2  |
| Section S3  | Photophysical Data                 | S9  |
| Section S4  | Absorption and Emission Spectra    | S14 |
| Section S5  | Fluorescence Lifetime Measurements | S23 |
| Section S6  | X-Ray Analysis                     | S32 |
| Section S7  | Theoretical Methods                | S33 |
| Section S8  | Photostability Measurements        | S75 |
| Section S9  | NMR Spectra                        | S77 |
| Section S10 | References                         | S99 |

## Section S1: General Information

All chemicals are from commercial sources and were used as received, unless otherwise noted. All reported NMR spectra were recorded on Varian 500 MHz or Varian 600 MHz spectrometers. Chemical shifts ( $\delta$ ; ppm) for  $^1\text{H}$  and  $^{13}\text{C}$  NMR spectra were determined with TMS or residual solvent signals as the internal reference.  $J$  values are given in Hz. Spectroscopic-grade solvents were used in all fluorescence/absorption-spectroscopy measurements. Mass spectra were obtained with EI ion source and the EBE double focusing geometry mass analyzer or spectrometer equipped with electro-spray ion source with Q-TOF type mass analyzer. The synthesis of compounds **1a-1c**,<sup>1</sup> **2a**,<sup>2</sup> **2b** and **2c**<sup>3</sup> have been described previously.

Absorption and fluorescence spectra were recorded on a Shimadzu UV-3600 spectrometer and an Edinburgh Instruments FLS1000 photoluminescence spectrometer, respectively. Optical densities at the excitation wavelengths for fluorescence measurements were maintained at around 0.1 to avoid reabsorption. Fluorescence lifetimes were measured using a time-correlated single photon counting (TCSPC) technique. Samples were excited at 485 nm by a LDH-P-C-485 laser diode (PicoQuant Germany). The emission was detected by a micro-channel photomultiplier (R3809U-50, Hamamatsu Inc.) coupled with a monochromator. The signals were processed by PicoHarp 300 electronic module (PicoQuant GmbH). The fluorescence decay was collected with a maximum peak count of 10000 counts with a time resolution of 16 ps. Photostability was determined using an Asahi Spectra Max-350 as a light source and a Perkin Elmer Lambda 25 UV/Vis spectrometer.

## Section S2: Experimental Procedures

### Imidazo[1,2-a]quinoline-4-carbonitrile (**2d**)

A solution of 2-nitrobenzaldehyde (5.00 g, 33.1 mmol), malononitrile (2.40 g, 36.4 mmol) and 2 drops of pyridine were refluxed in methanol (20 mL) for 3 hours. During this time a white precipitate formed in the still hot solution. This solid was filtered and washed with methanol. This solid together with iron powder (7.31g, 0.166 mol) was slurried in ethanol (50 mL) and stirred at 45 °C for 30 minutes, then an aqueous solution of  $\text{FeCl}_3$  (0.3 g,  $\text{FeCl}_3$  dissolved in 6 ml water) was added dropwise. The mixture was then heated to reflux and monitored by TLC (1:1 EtOAc:hexanes). Upon completion of the reaction, the still hot slurry was filtered through celite, and the volatiles removed *in vacuo*. Addition of water to the residue produced an ochre product which was isolated by filtration. This was then recrystallized from THF to yield 2-amino-3-cyanoquinoline (3.9 g, 23.2 mmol, 70%) with spectra consistent to the literature.<sup>4</sup>

2-Amino-3-cyanoquinoline (0.86g, 5.1 mmol) was dissolved in hot ethanol (50 mL), and a 50% solution of chloroacetaldehyde was added (0.65 mL, 10.2 mmol) slowly. Heating was continued for 5 hours at which point the solution was poured into a solution of sat.  $\text{NaHCO}_3$ . The product was then extracted into DCM, dried with  $\text{MgSO}_4$ , concentrated *in vacuo* and recrystallized from ethyl acetate to yield an off-white powder (0.312g, 1.61 mmol, 32%).

$^1\text{H}$  NMR (500 MHz,  $\text{CDCl}_3$ ); 8.14 (d,  $J=1.5$  Hz, 1H), 8.03 (s, 1H), 7.98 (d,  $J=8.3$  Hz, 1H), 7.91 (td,  $J=8.3, 0.7$  Hz, 1H), 7.83 (td,  $J=7.6, 1.5$  Hz, 1H), 7.79 (d,  $J=1.5$  Hz, 1H), 7.58 (t,  $J=7.6$  Hz, 1H).  $^{13}\text{C}$  NMR (126 MHz,

CDCl<sub>3</sub>); 140.5, 133.8, 133.8, 133.6, 132.1, 130.2, 125.8, 121.5, 115.5, 114.9, 112.4, 102.7. ESI-TOF MS (in MeCN) m/z: Calculated for C<sub>12</sub>H<sub>8</sub>N<sub>3</sub> 194.0718, found 194.0717.

### Benzo[h]benzo[4,5]imidazo[1,2-a]quinoline-8-carbonitrile (**2f**)

(2-Benzimidazolyl)acetonitrile (2.25 g, 14.3 mmol) and 1-bromo-2-naphthaldehyde (3.37 g, 14.3 mmol) were combined in ethanol (50 mL) with 3 drops of piperidine and refluxed for 5 hours. The bright yellow precipitate that formed in this time was filtered from the still warm solution and washed with ethanol then diethyl ether. The solid was then directly suspended in sulfolane (12 mL) and heated to 250 °C until cyclization was complete (monitored by TLC 1:1 EtOAc:hexanes, approximately 2 hours). The brown solution was then cooled to 100 °C at which point it was added to a vigorously stirred solution of water (150 mL) in a dropwise manner. The yellow precipitate which formed was filtered, washed with water, ethanol then diethyl ether to yield the title compound (3.45 g, 11.8 mmol, 82%). Spectral data matches that of this compound prepared through a different procedure.<sup>5</sup>

<sup>1</sup>H NMR (500 MHz, DMSO-*d*<sub>6</sub>); 8.85 (d, *J*=2.9 Hz, 1H), 8.71 (dd, *J*=8.8, 0.7 Hz, 1H), 8.24 (d, *J*=8.3 Hz, 1H), 8.16 (d, *J*=8.8 Hz, 1H), 7.99 - 8.10 (m, 3H), 7.87 (t, *J*=7.6 Hz, 1H), 7.73 (t, *J*=7.6 Hz, 1H), 7.62 (t, *J*=7.8 Hz, 1H), 7.42 (t, *J*=7.8 Hz, 1H). <sup>13</sup>C NMR (126 MHz, DMSO-*d*<sub>6</sub>); 146.3, 144.1, 139.6, 135.0, 133.3, 132.2, 129.6, 128.6, 126.5, 125.6, 125.5, 125.3, 124.1, 121.5, 121.0, 120.4, 120.1, 115.6, 115.4, 101.0. ESI-TOF MS (in MeCN) m/z: Calculated for C<sub>20</sub>H<sub>12</sub>N<sub>3</sub> 294.1031, found 294.1024.

### General procedure for the synthesis of DPP derivatives **3a-3i**

A mixture of nitrile **2** (1.2 eq) and lithium tert-butoxide (4 eq) was heated to 100 °C under argon. To this solid mixture, pyrrolodone **1** (1 eq) dissolved in a 1:1 mixture of toluene and *tert*-amyl alcohol was added in a dropwise manner. The resulting dark purple/blue solution was left to stir at this temperature overnight. It was then cooled, quenched with acetic acid and the volatiles removed. The residue was extracted into dichloromethane, dried with MgSO<sub>4</sub> then the solvent was removed *in vacuo*. The resulting residue was recrystallized from an appropriate solvent to yield the desired DPP product.

#### Synthesis of **3a**

**2a** (0.26 g, 1.8 mmol) and **1a** (0.61 g, 1.5 mmol) in 8 mL of combined solvent were used to produce **3a** as a dark red solid (0.38 g, 0.91 mmol, 61%). Recrystallized from ethyl acetate.

<sup>1</sup>H NMR (500 MHz, CDCl<sub>3</sub>); 11.19 (br. s, 1H), 9.18 (d, *J*=7.3 Hz, 1H), 8.23 (d, *J*=6.7 Hz, 1H), 7.89 (d, *J*=8.8 Hz, 2H), 7.66 (d, *J*=6.6 Hz, 2H), 7.04 - 7.10 (m, 3H), 3.91 (s, 3H), 3.88 (t, *J*=7.5 Hz, 2H), 1.68 (quin, *J*=7.5 Hz, 2H), 1.35 (sxt, 7.5 Hz, 2H), 0.91 (t, *J*=7.5 Hz, 1H). <sup>13</sup>C NMR (126 MHz, CDCl<sub>3</sub>); 162.6, 161.9, 161.8, 147.8, 142.1, 141.7, 133.1, 130.7, 128.1, 127.7, 120.6, 116.8, 114.5, 113.3, 113.0, 110.7, 110.3, 55.5, 42.1, 31.6, 20.1, 13.6. ESI-TOF MS (in MeCN) m/z: Calculated for C<sub>24</sub>H<sub>23</sub>N<sub>4</sub>O<sub>3</sub> 415.1770, found 415.1762. m.p 199 °C.

#### Synthesis of **3b**

**2b** (0.40 g, 2.0 mmol) and **1a** (0.68 g, 1.7 mmol) in 8 mL of combined solvent were used to produce **3b** as a dark red solid (0.35 g, 0.75 mmol, 45%). Recrystallized from diethyl ether.

<sup>1</sup>H NMR (500 MHz, CDCl<sub>3</sub>); 11.19 (br. s, 1H), 9.14 (d, *J*=7.3, 1H), 8.15 (d, *J*=6.4 Hz, 1H), 7.89 (d, *J*=8.7, 2H), 7.39 (s, 1H), 7.08 (d, *J*=8.7 Hz, 2H), 6.98 (dd, *J*=7.3, 6.4 Hz, 2H), 3.92 (s, 3H), 3.89 (t, *J*=7.7 Hz, 2H), 1.68 (quin, *J*=7.7 Hz, 2H), 1.42 (s, 9H), 1.35 (sxt, 7.5 Hz, 2H), 0.91 (t, *J*=7.5 Hz, 2H). <sup>13</sup>C NMR (126 MHz, CDCl<sub>3</sub>); 162.5, 162.0, 161.8, 157.4, 142.3, 141.7, 130.7, 127.8, 127.5, 120.7, 120.4, 116.0, 114.4, 114.1, 112.6, 107.22, 55.5, 42.1, 32.4, 31.7, 30.11, 20.1, 13.6. ESI-TOF MS (in MeCN) *m/z*: Calculated for C<sub>28</sub>H<sub>31</sub>N<sub>4</sub>O<sub>3</sub> 471.2396, found 471.2400. m.p 200 °C.

#### Synthesis of **3c**

**2c** (0.56 g, 2.6 mmol) and **1a** (0.87 g, 2.1 mmol) in 8 mL of combined solvent were used to produce **3c** as a dark red solid (0.61 g, 1.2 mmol, 59%). Recrystallized from ethyl acetate.

<sup>1</sup>H NMR (500 MHz, CDCl<sub>3</sub>); 11.15 (br. s, 1H), 9.17 (d, *J*=7.4, 1H), 8.20 (d, *J*=6.5 Hz, 1H), 7.99 (d, *J*=7.8, 2H), 7.89 (m, 3H), 7.47 (t, *J*=7.7 Hz, 1H), 7.38 (m, 1H), 7.09 (d, *J*=8.8 Hz, 2H), 7.01 (dd, *J*=7.0, 6.4 Hz, 2H), 3.92 (s, 3H), 3.87 (t, *J*=7.7 Hz, 2H), 1.68 (m, 2H), 1.34 (sxt, 7.3 Hz, 2H), 0.92 (t, *J*=7.3 Hz, 1H). <sup>13</sup>C NMR (126 MHz, CDCl<sub>3</sub>); 162.5, 161.9, 161.8, 147.7, 145.7, 142.3, 141.7, 132.6, 130.7, 128.8, 128.5, 128.2, 127.4, 126.3, 120.6, 116.3, 114.5, 113.4, 110.7, 110.2, 108.4, 55.5, 42.1, 31.7, 20.1, 13.6. ESI-TOF MS (in MeCN) *m/z*: Calculated for C<sub>30</sub>H<sub>27</sub>N<sub>4</sub>O<sub>3</sub> 491.2083, found 491.2078. m.p 222 °C.

#### Synthesis of **3d**

**2d** (0.26 g, 1.3 mmol) and **1a** (0.40 g, 1.1 mmol) in 8 mL of combined solvent were used to produce **3d** as a dark purple solid (0.26 g, 0.55 mmol, 50%). Recrystallized from ethylacetate.

<sup>1</sup>H NMR (500 MHz, CDCl<sub>3</sub>); 11.34 (br. s, 1H), 9.62 (s, 1H), 8.12 (m, 2H), 7.91 (m, 3H), 7.73 (t, *J*=8.1 Hz, 1H), 7.68 (s, 1H), 7.54 (t, *J*=7.6 Hz, 1H), 7.09 (d, *J*=8.8 Hz, 2H), 3.92 (s, 3H), 3.91 (m, 2H), 1.71 (quin, *J*=7.7 Hz, 2H), 1.38 (qt, *J*=7.7, 7.4 Hz, 2H), 0.93 (t, *J*=7.4 Hz, 1H). <sup>13</sup>C NMR (126 MHz, CDCl<sub>3</sub>); 162.6, 162.0, 161.9, 147.7, 141.9, 140.9, 132.9, 131.8, 131.2, 130.8, 130.7, 130.1, 125.6, 123.5, 120.7, 115.9, 115.1, 114.5, 111.5, 110.8, 110.4, 55.5, 42.1, 31.7, 20.1, 13.7. ESI-TOF MS (in MeCN) *m/z*: Calculated for C<sub>28</sub>H<sub>25</sub>N<sub>4</sub>O<sub>3</sub> 465.1927, found 465.1924. m.p 218 °C.

#### Synthesis of **3e**

**2e** (0.70 g, 2.9 mmol) and **1a** (0.98 g, 2.4 mmol) in 16 mL of combined solvent were used to produce **3e** as a dark purple solid (0.65 g, 1.3 mmol, 53%). Recrystallized from ethyl acetate.

<sup>1</sup>H NMR (500 MHz, CDCl<sub>3</sub>); 11.59 (br. s, 1H), 9.86 (s, 1H), 8.6 (d, *J*=8.6 Hz, 1H), 8.45 (d, *J*=8.4 Hz, 1H), 8.16 (d, *J*=7.8 Hz, 1H), 8.08 (d, *J*=8.61 Hz, 1H), 7.93 (d, *J*=8.6 Hz, 2H), 7.85 (m, 1H), 7.61 (m, 1H), 7.56 (m, 2H), 7.10 (d, *J*=8.6 Hz, 2H), 3.93 (s, 3H), 3.91 (m, 2H), 1.75 (m, 2H), 1.37 (m, 2H), 0.94 (t, *J*=7.3 Hz, 3H). <sup>13</sup>C NMR (126 MHz, CDCl<sub>3</sub>); 162.6, 162.0, 161.9, 147.8, 145.2, 143.6, 141.9, 135.8, 134.9, 131.8, 131.7, 130.7, 130.4, 125.1, 124.9, 123.5, 123.4, 120.7, 120.6, 115.9, 115.1, 114.5, 114.1, 110.8, 110.4, 55.5, 42.2, 31.7, 20.1, 13.7. ESI-TOF MS (in MeCN) *m/z*: Calculated for C<sub>32</sub>H<sub>27</sub>N<sub>4</sub>O<sub>3</sub> 515.2083, found 515.2084. m.p 240 °C.

#### Synthesis of **3f**

**2f** (0.44 g, 1.5 mmol) and **1a** (0.50 g, 1.2 mmol) in 8 mL of combined solvent were used to produce **3f** as a dark green solid (77 mg, 0.14 mmol, 11%). Recrystallized from diethyl ether.

<sup>1</sup>H NMR (500 MHz, CDCl<sub>3</sub>); 11.53 (br. s, 1H), 9.80 (s, 1H), 8.74 (d, *J*=8.6 Hz, 1H), 7.96 - 8.10 (m, 4H), 7.88 - 7.94 (m, 2H), 7.72 (t, *J*=7.5 Hz, 1H), 7.58 (m, 2H), 7.35 (dd, *J*=8.4, 7.2 Hz, 1H), 7.11 (d, *J*=8.6 Hz, 2H), 3.93 (s, 3H), 3.91 (m, 2H), 1.72 (qt, *J*=7.7, 7.2 Hz, 2H), 1.39 (qt, *J*=7.7, 7.3 Hz, 2H), 0.94 (t, *J*=7.3 Hz, 3H). <sup>13</sup>C NMR (126 MHz, CDCl<sub>3</sub>); 162.6, 162.0, 161.9, 147.8, 146.6, 143.9, 141.6, 135.1, 134.1, 132.7, 131.9, 130.7, 128.8, 128.6, 126.6, 126.5, 125.5, 124.9, 124.4, 122.5, 122.4, 120.7, 120.6, 120.6, 115.8, 115.6, 114.5, 111.0, 110.5, 55.5, 42.2, 31.7, 20.1, 13.7. ESI-TOF MS (in MeCN) *m/z*: Calculated for C<sub>36</sub>H<sub>29</sub>N<sub>4</sub>O<sub>3</sub> 565.2240, found 565.2245. m.p 304 °C.

#### Synthesis of **3g**

**2a** (0.22 g, 1.5 mmol) and **1b** (0.52 g, 1.3 mmol) in 8 mL of combined solvent were used to produce **3g** as a red solid (0.18 g, 0.42 mmol, 33%). Recrystallized from ethyl acetate.

<sup>1</sup>H NMR (500 MHz, CDCl<sub>3</sub>); 11.09 (br. s, 1H), 9.18 (d, *J*=7.2 Hz, 1H), 8.24 (d, *J*=6.8 Hz, 1H), 7.65 (s, 1H), 7.57 (dd, *J*=7.5, 1.2 Hz, 1H), 7.49 (td, *J*=7.8, 1.4 Hz), 7.12 (t, *J*=7.7 Hz, 1H), 7.04 (m, 2H), 3.89 (s, 3H), 3.64 (m, 2H), 1.50 (quin, *J*=7.5 Hz, 2H), 1.20 (sxt, *J*=7.5 Hz, 2H), 0.79 (t, *J*=7.4 Hz, 3H). <sup>13</sup>C NMR (126 MHz, CDCl<sub>3</sub>); 161.9, 161.8, 156.9, 145.4, 142.7, 142.1, 133.1, 132.3, 131.2, 128.5, 127.9, 121.1, 117.6, 116.7, 113.3, 113.0, 111.4, 111.4, 110.6, 55.6, 41.9, 31.3, 20.0, 13.5. ESI-TOF MS (in MeCN) *m/z*: Calculated for C<sub>24</sub>H<sub>23</sub>N<sub>4</sub>O<sub>3</sub> 415.1770, found 415.1773. m.p 127 °C.

#### Synthesis of **3h**

**2e** (0.35 g, 1.4 mmol) and **1b** (0.49 g, 1.2 mmol) in 8 mL of combined solvent were used to produce **3h** as a red solid (0.30 g, 0.56 mmol, 48%). Recrystallized from ethyl acetate.

<sup>1</sup>H NMR (500 MHz, CDCl<sub>3</sub>); 11.32 (s, 1H), 9.69 (s, 1H), 8.48 (d, *J*=8.5 Hz, 1H), 8.32 (d, *J*=8.4 Hz, 1H), 8.05 (d, *J*=7.8 Hz, 1H), 7.93 (d, *J*=8.0 Hz, 1H), 7.76 (m, 1H), 7.60 (dd, *J*=7.4, 1.5 Hz, 1H), 7.53 (m, 4H), 7.17 (m, 1H), 7.09 (d, *J*=8.5 Hz, 1H), 3.94 (s, 3H), 3.69 (br. m, 2H), 1.56 (quin, *J*=7.5 Hz), 1.24 (m, 2H), 0.82 (t, *J*=7.4 Hz, 3H). <sup>13</sup>C NMR (126 MHz, CDCl<sub>3</sub>); 161.8, 161.8, 156.9, 145.3, 144.8, 143.4, 142.7, 135.7, 135.1, 132.4, 131.7, 131.7, 131.2, 130.2, 125.0, 124.8, 123.4, 123.1, 121.2, 120.6, 117.7, 115.5, 115.0, 114.0, 111.5, 110.6, 55.6, 41.9, 31.4, 20.0, 13.6. ESI-TOF MS (in MeCN) *m/z*: Calculated for C<sub>32</sub>H<sub>27</sub>N<sub>4</sub>O<sub>3</sub> 515.2083, found 515.2087. m.p 250 °C.

#### Synthesis of **3i**

**2e** (0.21 g, 0.86 mmol) and **1c** (0.30 g, 0.72 mmol) in 8 mL of combined solvent were used to produce **3i** as a green solid (0.22 g, 0.41 mmol, 57%). Recrystallized from ethyl acetate.

<sup>1</sup>H NMR (500 MHz, CDCl<sub>3</sub>); 11.49 (s, 1H), 9.74 (s, 1H), 8.54 (d, *J*=8.3 Hz, 1H), 8.38 (d, *J*=8.2 Hz, 1H), 8.09 (d, *J*=7.8 Hz, 1H), 8.02 (d, *J*=7.8 Hz, 1H), 7.97 (d, *J*=8.9 Hz, 2H), 7.78 (t, *J*=7.8 Hz, 1H), 7.56 (m, 1H), 7.50 (m, 2H), 6.83 (d, *J*=8.9 Hz, 2H), 3.93 (t, *J*=8.0 Hz, 2H), 1.78 (t, *J*=8.0, 7.5 Hz, 2H), 1.43 (qt, *J*=7.5, 7.4 Hz, 2H), 0.98 (t, *J*=7.4 Hz, 1H). <sup>13</sup>C NMR (126 MHz, CDCl<sub>3</sub>); 163.0, 161.8, 152.1, 149.3, 145.2, 143.6, 139.4, 135.5, 133.7, 131.5, 131.2, 130.8, 130.3, 124.9, 124.7, 123.5, 123.3, 120.7, 116.0, 115.2, 115.0, 114.0, 111.6, 111.2, 109.0, 42.5, 40.0, 31.8, 20.2, 13.8. ESI-TOF MS (in MeCN) *m/z*: Calculated for C<sub>33</sub>H<sub>30</sub>N<sub>5</sub>O<sub>2</sub> 528.2400, found 528.2405. m.p 216 °C.

### General procedure A for the synthesis of **4** (using Et<sub>3</sub>N)

To a solution of **3** (0.1 g) in dry DCM (10 mL) under argon was added Et<sub>3</sub>N (10 eq) with no observable color change. Subsequently, BF<sub>3</sub>·OEt<sub>2</sub> was added slowly at room temperature and stirring was continued overnight. The reaction was quenched with water and extracted into DCM. The residue was purified by column chromatography (DCM/MeOH).

### General procedure B for the synthesis of **4** (using LiHMDS)

To a solution of **3** (0.1 g) in dry DCM (10 mL) under argon was added a 1.0M THF solution of LiHMDS (1.2 eq) which rapidly darkened the solution. Subsequently, BF<sub>3</sub>·OEt<sub>2</sub> was added slowly at room temperature and stirring was continued overnight. The reaction was quenched with water and extracted into DCM. The residue was purified by column chromatography (DCM/MeOH).

Note - Despite many attempts in a range of solvents, the solubility of DPP-BF<sub>2</sub> compounds with large aromatic imidazopyridine substituents at levels required for well resolved <sup>13</sup>CNMR spectra proved difficult. In these cases some quaternary carbon atoms are not observed.

### Synthesis of **4a**

General Procedure B; Yield 37 %.

<sup>1</sup>H NMR (500 MHz, DMSO-*d*<sub>6</sub>); 8.96 (d, *J*=7.6 Hz, 1H), 8.90 (d, *J*=7.6 Hz, 1H), 8.40 (d, *J*=2.0 Hz, 1H), 8.20 (d, *J*=2.0 Hz, 1H), 7.92 (d, *J*=8.4 Hz, 2H), 7.65 (t, *J*=7.1 Hz, 1H), 7.16 (d, *J*=8.4 Hz, 2H), 3.88 (m, 5H), 1.48 (m, 2H), 1.21 (m, 2H), 0.80 (m, 3H). <sup>13</sup>C NMR (126 MHz, DMSO-*d*<sub>6</sub>); 161.6, 161.5, 161.3, 147.1, 139.0, 137.5, 130.6, 130.1, 129.2, 124.3, 120.2, 117.3, 114.4, 113.0, 111.4, 110.6, 109.5, 55.5, 40.9, 30.8, 19.3, 13.4. <sup>19</sup>F NMR (470 MHz, DMSO-*d*<sub>6</sub>); -148.4. ESI-TOF MS (in MeCN) *m/z*: Calculated for C<sub>24</sub>H<sub>21</sub>N<sub>4</sub>O<sub>3</sub>BF<sub>2</sub>Na 485.1572, found 485.1579. m.p 155 °C.

### Synthesis of **4b**

General Procedure B; Yield 50 %.

<sup>1</sup>H NMR (500 MHz, DMSO-*d*<sub>6</sub>); 8.98 (dd, *J*=7.2, 1.0 Hz, 1H), 8.79 (dd, *J*=6.7, 1.0 Hz, 1H), 8.22 (s, 1H), 7.90 (d, *J*=8.9 Hz, 2H), 7.61 (dd, *J*=7.2, 6.7 Hz, 1H), 7.14 (d, *J*=8.9 Hz, 2H), 3.86 (s, 3H), 3.82 (m, 2H), 1.48 (s, 6H), 1.45 (m, 2H), 1.21 (s, 3H), 1.18 (m, 2H), 0.78 (t, *J*=7.4 Hz, 3H). <sup>13</sup>C NMR (126 MHz, DMSO-*d*<sub>6</sub>); 163.7, 161.4, 161.2, 149.7, 146.6, 139.2, 130.5, 129.7, 129.2, 120.2, 117.0, 144.4, 112.8, 111.5, 109.5, 105.9, 55.5, 32.4, 30.8, 29.5, 22.1, 19.29, 13.9, 13.4. <sup>19</sup>F NMR (470 MHz, DMSO-*d*<sub>6</sub>); -132.5, -148.3. ESI-TOF MS (in MeCN) *m/z*: Calculated for C<sub>28</sub>H<sub>29</sub>N<sub>4</sub>O<sub>3</sub>BF<sub>2</sub>Na 541.2198, found 541.2207. decomp. at 200 °C.

### Synthesis of **4c**

General Procedure B; Yield 44 %.

<sup>1</sup>H NMR (500 MHz, DMSO-*d*<sub>6</sub>); 9.03 (d, *J*=7.4 Hz, 1H), 8.91 (d, *J*=6.8 Hz, 1H), 8.63 (s, 1H), 7.96 (dd, *J*=7.4, 1.8 Hz, 2H), 7.91 (d, *J*=8.3 Hz, 2H), 7.68 (t, *J*=7.1 Hz, 1H), 7.56 (m, 3H), 7.15 (d, *J*=8.3 Hz, 2H), 3.88 (s, 3H), 3.85 (m, 2H), 1.48 (m, 2H), 1.21 (m, 2H), 0.80 (m, 3H). <sup>13</sup>C NMR (126 MHz, DMSO-*d*<sub>6</sub>); 163.7, 161.4, 161.3, 146.9, 139.2, 130.6, 130.5, 129.8, 129.3, 129.0, 128.7, 127.9, 120.2, 120.1, 117.5, 114.5, 114.4, 113.0,

111.4, 109.5, 55.5, 40.9, 30.7, 19.3, 13.4. ESI-TOF MS (in MeCN) m/z: Calculated for C<sub>30</sub>H<sub>25</sub>N<sub>4</sub>O<sub>3</sub>BF<sub>2</sub>Na 561.1885, found 561.1896. m.p 248 °C.

#### Synthesis of **4d**

General Procedure B; Yield 46 %.

<sup>1</sup>H NMR (500 MHz, toluene-*d*<sub>8</sub>); 9.81 (s, 1H), 7.98 (d, *J*=9.0 Hz, 2H), 7.68 (m, 1H), 7.33 (m, 2H), 7.21 (m, 1H), 7.06 (1, 2H), 6.96 (m, partially obscured by residual solvent), 6.76 (d, *J*=9.0 Hz, 2H), 3.83 (t, *J*=7.6 Hz, 2H), 3.26 (s, 3H), 1.64 (m, 2H), 1.26 (m, 2H), 0.81 (t, *J*=7.4 Hz, 3H). <sup>13</sup>C NMR (126 MHz, DMSO-*d*<sub>6</sub>); 162.3, 161.6, 161.3, 146.7, 141.5, 140.8, 132.5, 131.3, 130.8, 130.6, 129.5, 128.9, 124.3, 123.6, 121.1, 116.1, 114.5, 114.1, 111.2, 110.9, 110.7, 54.4, 41.7, 31.6, 20.6, 13.4. <sup>19</sup>F NMR (470 MHz, toluene-*d*<sub>8</sub>); -147.5. ESI-TOF MS (in MeCN) m/z: Calculated for C<sub>28</sub>H<sub>23</sub>N<sub>4</sub>O<sub>3</sub>BF<sub>2</sub>Na 535.1729, found 535.1736. decomp. at. 204 °C.

#### Synthesis of **4e**

General Procedure A; Yield 9 %. General Procedure B; Yield 62 %. Instead of column chromatography, residue was purified by slurrying in 2mL DMF, then filtering and washing with DMF then diethyl ether.

<sup>1</sup>H NMR (500 MHz, CD<sub>2</sub>Cl<sub>2</sub> + TFA); 9.68 (s, 1H), 8.77 (d, *J*=8.6 Hz, 1H), 8.61 (m, 1H), 8.34 (d, *J*=7.4 Hz, 1H), 8.21 (m, 1H), 8.12 (m, 1H), 7.97 (m, 1H), 7.87-7.80 (m, 4H), 7.10 (d, *J*=8.8 Hz, 2H), 3.92 (s, 3H), 3.89 (m, 2H), 1.68 (m, 2H), 1.35 (m, 2H), 0.91 (t, *J*=7.3 Hz, 3H). <sup>13</sup>C NMR (126 MHz, CD<sub>2</sub>Cl<sub>2</sub> + TFA); 167.0, 165.2, 163.4, 138.7, 136.9, 134.4, 133.4, 132.7, 131.9, 130.3, 129.6, 129.1, 128.4, 127.1, 124.1, 117.5, 116.9, 116.4, 116.1, 115.8, 115.4, 112.2, 110.6, 56.5, 43.2, 31.6, 20.5, 13.8. <sup>19</sup>F NMR (470 MHz, CD<sub>2</sub>Cl<sub>2</sub> + TFA); -146.3. ESI-TOF MS (in MeCN) m/z: Calculated for C<sub>32</sub>H<sub>25</sub>N<sub>4</sub>O<sub>3</sub>BF<sub>2</sub>Na 585.1885, found 585.1889. m.p 239 °C.

#### Synthesis of **4g**

General Procedure A; Yield 5 %.

<sup>1</sup>H NMR (500 MHz, DMSO-*d*<sub>6</sub>); 8.95 (d, *J*=7.4 Hz, 1H), 8.93 (d, *J*=6.8 Hz, 1H), 8.41 (1H), 8.20 (1H), 7.66 (t, *J*=7.1 Hz, 1H), 7.57 (m, 1H), 7.50 (m, 1H), 7.25 (d, *J*=8.3 Hz, 1H), 7.13 (t, *J*=7.4 Hz, 1H), 3.86 (s, 3H), 3.52 (m, 2H), 1.35 (quin, *J*=7.0 Hz, 2H), 1.09 (td, *J*=7.4 Hz, *J*=7.0 Hz, 2H), 0.69 (t, *J*=7.4 Hz, 3H). <sup>13</sup>C NMR (126 MHz, DMSO-*d*<sub>6</sub>); 163.6, 160.6, 156.6, 144.6, 140.3, 137.5, 132.5, 130.8, 130.4, 129.5, 124.3, 120.7, 117.3, 117.0, 116.92, 112.9, 112.5, 111.9, 110.2, 55.7, 40.7, 30.6, 19.1, 13.2. <sup>19</sup>F NMR (470 MHz, DMSO-*d*<sub>6</sub>); -140.4. ESI-TOF MS (in MeCN) m/z: Calculated for C<sub>24</sub>H<sub>21</sub>N<sub>4</sub>O<sub>3</sub>BF<sub>2</sub>Na 485.1572, found 485.1576. decomp. at. 215 °C.

#### Synthesis of **4h**

General Procedure A; Yield 9 %. General Procedure B; Yield 41 %.

<sup>1</sup>H NMR (500 MHz, DMSO-*d*<sub>6</sub>); 9.68 (s, 1H), 9.12 (d, *J*=8.3 Hz, 1H), 9.07 (d, *J*=8.3 Hz, 1H), 8.36 (d, *J*=8.0 Hz, 1H), 8.12 (m, 2H), 7.89-7.78 (m, 3H), 7.60 (m, 1H), 7.56 (m, 1H), 7.28 (d, *J*=8.3 Hz, 1H), 7.16(t, *J*=7.4 Hz, 1H), 3.89 (s, 3H), 3.57 (m, 2H), 1.41 (m, 2H), 1.12 (m, 2H), 0.72 (t, *J*=7.4 Hz, 3H). <sup>13</sup>C NMR (126 MHz, DMSO-*d*<sub>6</sub>); 163.4, 160.6, 156.6, 144.6, 141.2, 140.6, 135.5, 134.0, 133.9, 133.2, 132.6, 131.9, 130.9, 129.4, 127.8, 127.3, 125.8, 123.9, 120.8, 117.4, 117.1, 116.5, 116.0, 112.4, 111.9, 111.8, 110.1, 55.7,

45.8, 30.6, 19.2, 13.3. ESI-TOF MS (in MeCN) m/z: Calculated for  $C_{32}H_{25}N_4O_3BF_2Na$  585.1885, found 585.1893. decomp. at. 240 °C.

#### Synthesis of **4i**

General Procedure A; Yield 10 %.

$^1H$  NMR (500 MHz, DMSO- $d_6$ ); 9.57 (s, 1H), 9.02 (m, 2H), 8.27 (m, 1H), 8.10 (m, 1H), 8.06, (m, 1H), 7.99 (d,  $J=9.0$  Hz, 2H), 7.85 (m, 1H), 7.80 (m, 1H), 6.84 (d,  $J=9.0$  Hz, 2H), 3.88 (m, 2H), 3.06 (s, 6H), 1.57 (m, 2H), 1.26 (m, 2H), 0.85 (m, 3H). Solubility prevented well resolved  $^{13}C$  NMR.  $^{19}F$  NMR (470 MHz, DMSO- $d_6$ ); 142.3. ESI-TOF MS (in MeCN) m/z: Calculated for  $C_{33}H_{29}N_5O_2BF_2$  576.2382, found 576.2401. decomp. at. 244 °C.



### Section S3: Absorption and Emission Data

Most of emission decays could be fitted successfully to a single exponent accounting for a background due to the instruments dark counts. In some cases a bi-exponential decay model had to be used, but when the second component contribution was less than 5% it was ignored. Other case are marked in the table and discussed separately in the Table S1 footnote field.

**Table S1. Photophysical data of DPPs and DPP-BF<sub>2</sub> hybrids in a range of solvents.**

| Dye       | Solvent           | $\max\lambda_{\text{abs}}$<br>[nm] | $\epsilon_{\text{max}}$ [M <sup>-1</sup> cm <sup>-1</sup> ] | $\max\lambda_{\text{ems}}$<br>[nm] | Stokes shift<br>[cm-1] | $\Phi_{\text{fl}}^{\text{a}}$ | $\tau_{\text{F}}$<br>[ns] | $k_{\text{r}}$<br>[10 <sup>8</sup> s <sup>-1</sup> ] | $k_{\text{nr}}$<br>[10 <sup>8</sup> s <sup>-1</sup> ] |
|-----------|-------------------|------------------------------------|-------------------------------------------------------------|------------------------------------|------------------------|-------------------------------|---------------------------|------------------------------------------------------|-------------------------------------------------------|
| <b>3a</b> | Toluene           | 512, 549                           | 12900, 13700                                                | 573, 611                           | 760                    | 0.78                          | 5.2                       | 1.5                                                  | 0.4                                                   |
|           | THF               | 508, 546                           | 14900, 15800                                                | 566, 611                           | 650                    | 0.72                          | 5.4                       | 1.3                                                  | 0.5                                                   |
|           | CHCl <sub>3</sub> | 509, 544                           | 15000, 15900                                                | 569, 614                           | 810                    | 0.63                          | 5.5                       | 1.1                                                  | 0.7                                                   |
|           | DMF               | 507, 542                           | 12700, 13700                                                | 566, 611                           | 780                    | 0.70                          | 5.4                       | 1.3                                                  | 0.6                                                   |
|           | MeCN              | 503, 536                           | 17400, 18100                                                | 562, 605                           | 860                    | 0.54                          | 5.4                       | 1.0                                                  | 0.9                                                   |
|           | MeOH              | 504, 530                           | 14800, 17000                                                | 565, 604                           | 1170                   | 0.43                          | 3.6                       | 1.2                                                  | 1.6                                                   |
| <b>3b</b> | Toluene           | 510, 549                           | 13600, 14400                                                | 570, 617                           | 670                    | 0.79                          | 5.1                       | 1.5                                                  | 0.4                                                   |
|           | THF               | 510, 544                           | 13500, 14100                                                | 565, 610                           | 680                    | 0.71                          | 5.3                       | 1.3                                                  | 0.5                                                   |
|           | CHCl <sub>3</sub> | 509, 544                           | 17400, 18500                                                | 568, 613                           | 780                    | 0.61                          | 5.2                       | 1.2                                                  | 0.8                                                   |
|           | DMF               | 507, 543                           | 15400, 16500                                                | 565, 611                           | 720                    | 0.76                          | 5.4                       | 1.4                                                  | 0.4                                                   |
|           | MeCN              | 503, 537                           | 13100, 13300                                                | 562, 605                           | 830                    | 0.73                          | 5.4                       | 1.4                                                  | 0.5                                                   |
|           | MeOH              | 504, 530                           | 12500, 15200                                                | 562, 604                           | 1070                   | 0.59                          | 3.7                       | 1.6                                                  | 1.1                                                   |
| <b>3c</b> | Toluene           | 516, 555                           | 16800, 17800                                                | 576, 622                           | 660                    | 0.69                          | 5.0                       | 1.4                                                  | 0.6                                                   |
|           | THF               | 512, 549                           | 20800, 21600                                                | 570, 616                           | 670                    | 0.62                          | 5.2                       | 1.2                                                  | 0.7                                                   |
|           | CHCl <sub>3</sub> | 513, 548                           | 24100, 25400                                                | 573, 618                           | 800                    | 0.58                          | 5.1                       | 1.1                                                  | 0.8                                                   |
|           | DMF               | 511, 546                           | 19300, 20400                                                | 572, 614                           | 830                    | 0.71                          | 5.3                       | 1.3                                                  | 0.5                                                   |
|           | MeCN              | 506, 539                           | 21200, 21400                                                | 567, 610                           | 920                    | 0.60                          | 5.3                       | 1.1                                                  | 0.8                                                   |
|           | MeOH              | 503, 535                           | 16800, 19200                                                | 568, 611                           | 1100                   | 0.47                          | 3.7                       | 1.3                                                  | 1.4                                                   |
| <b>3d</b> | Toluene           | 521, 561                           | 17700, 18500                                                | 584, 633                           | 700                    | 0.71                          | 4.9                       | 1.4                                                  | 0.6                                                   |
|           | THF               | 517, 558                           | 18900, 19700                                                | 580, 627                           | 680                    | 0.62                          | 5.0                       | 1.2                                                  | 0.8                                                   |
|           | CHCl <sub>3</sub> | 517, 554                           | 19600, 20400                                                | 581, 629                           | 840                    | 0.70                          | 5.1                       | 1.4                                                  | 0.6                                                   |
|           | DMF               | 516, 554                           | 18200, 19200                                                | 580, 627                           | 810                    | 0.53                          | 4.9                       | 1.1                                                  | 1.0                                                   |

|           |                   |          |              |          |      |      |     |     |     |
|-----------|-------------------|----------|--------------|----------|------|------|-----|-----|-----|
|           | MeCN              | 511, 546 | 16600, 16900 | 576, 620 | 950  | 0.59 | 4.8 | 1.2 | 0.9 |
|           | MeOH              | 508, 540 | 14800, 16500 | 579, 625 | 1250 | 0.43 | 3.2 | 1.3 | 1.8 |
| <b>3e</b> | Toluene           | 534, 576 | 35700, 34600 | 601, 653 | 720  | 0.32 | 3.1 | 1.0 | 2.2 |
|           | THF               | 531, 572 | 30900, 30000 | 598, 646 | 760  | 0.36 | 3.4 | 1.1 | 1.9 |
|           | CHCl <sub>3</sub> | 530, 567 | 25100, 24700 | 597, 646 | 890  | 0.36 | 3.3 | 1.1 | 1.9 |
|           | DMF               | 529, 567 | 31600, 31000 | 601, 645 | 1000 | 0.37 | 3.3 | 1.1 | 1.9 |
|           | MeCN              | 524, 560 | 28600, 27900 | 595, 640 | 1050 | 0.32 | 3.1 | 1.0 | 2.2 |
|           | MeOH              | 520, 550 | 26900, 28600 | 597, 645 | 1430 | 0.23 | 2.1 | 1.1 | 3.7 |
| <b>3f</b> | Toluene           | 552, 595 | 34800, 32600 | 626, 678 | 830  | 0.27 | 2.7 | 1.0 | 2.7 |
|           | THF               | 549, 593 | 29300, 27700 | 620, 676 | 730  | 0.32 | 2.9 | 1.1 | 2.3 |
|           | CHCl <sub>3</sub> | 547, 588 | 27100, 26200 | 618, 673 | 830  | 0.38 | 2.8 | 1.4 | 2.2 |
|           | DMF               | 546, 589 | 29600, 28700 | 623, 674 | 930  | 0.33 | 2.8 | 1.2 | 2.4 |
|           | MeCN              | 541, 577 | 31600, 30300 | 616, 670 | 1100 | 0.31 | 2.8 | 1.1 | 2.5 |
|           | MeOH              | 537, 572 | 24700, 26300 | 616, 669 | 1250 | 0.15 | 1.5 | 1.0 | 5.7 |
| <b>3g</b> | Toluene           | 506, 536 | 14700, 12600 | 566, 611 | 920  | 0.60 | 5.4 | 1.1 | 0.7 |
|           | THF               | 502, 534 | 13900, 11800 | 560, 605 | 870  | 0.50 | 5.7 | 0.9 | 0.9 |
|           | CHCl <sub>3</sub> | 501, 530 | 15600, 13800 | 566, 611 | 1200 | 0.50 | 5.5 | 0.9 | 0.9 |
|           | DMF               | 497, 529 | 14100, 12600 | 564, 604 | 1170 | 0.55 | 5.5 | 1.0 | 0.8 |
|           | MeCN              | 494, 521 | 15200, 13400 | 558, 603 | 1270 | 0.55 | 5.4 | 1.0 | 0.8 |
|           | MeOH              | 496, 505 | 16600, 16600 | 564, 604 | 2430 | 0.25 | 3.1 | 0.8 | 2.4 |
| <b>3h</b> | Toluene           | 527, 564 | 25800, 20800 | 599, 648 | 1040 | 0.25 | 2.9 | 0.9 | 2.6 |
|           | THF               | 525, 562 | 27100, 21800 | 596, 644 | 1020 | 0.29 | 3.1 | 0.9 | 2.3 |
|           | CHCl <sub>3</sub> | 521, 555 | 22400, 20100 | 595, 640 | 1210 | 0.27 | 3.1 | 0.9 | 2.4 |
|           | DMF               | 519, 554 | 28700, 23400 | 596, 637 | 1270 | 0.27 | 3.3 | 0.8 | 2.2 |
|           | MeCN              | 516, 546 | 26700, 22000 | 591, 634 | 1340 | 0.21 | 2.9 | 0.7 | 2.7 |
|           | MeOH              | 510, 535 | 21600, 19700 | 594, 641 | 1860 | 0.13 | 1.8 | 0.7 | 4.8 |
| <b>3i</b> | Toluene           | 555, 602 | 25900, 33800 | 630, 684 | 740  | 0.97 | 4.1 | 2.4 | 0.1 |
|           | THF               | 555, 600 | 26700, 33600 | 646, 691 | 1190 | 0.66 | 4.3 | 1.5 | 0.8 |

|           |                   |          |              |          |      |      |                       |     |     |
|-----------|-------------------|----------|--------------|----------|------|------|-----------------------|-----|-----|
|           | CHCl <sub>3</sub> | 557, 596 | 27300, 35600 | 636, 687 | 1060 | 0.69 | 4.3                   | 1.6 | 0.7 |
|           | DMF               | 559, 598 | 22700, 28900 | 667      | 1730 | 0.16 | 6.9, 1.0 <sup>b</sup> | -   | -   |
|           | MeCN              | 553, 589 | 17200, 23000 | 654      | 1690 | 0.34 | 1.3                   | 2.6 | 5.1 |
|           | MeOH              | 550, 586 | 19600, 27100 | 651      | 1700 | 0.01 | - <sup>c</sup>        | -   | -   |
| <b>4a</b> | Toluene           | 338, 545 | 58,006,800   | 613, 655 | 2040 | 0.44 | 5.4                   | 0.8 | 1.0 |
|           | THF               | 550      | 8100         | 611      | 1820 | 0.48 | 5.5                   | 0.9 | 0.9 |
|           | CHCl <sub>3</sub> | 546      | 10100        | 608      | 1870 | 0.31 | 5.8                   | 0.5 | 1.2 |
|           | DMF               | 517, 551 | 7400, 7900   | 599      | 1450 | 0.52 | 5.8                   | 0.9 | 0.8 |
|           | MeCN              | 514, 542 | 8800, 5800   | 598      | 1730 | 0.45 | 5.8                   | 0.8 | 0.9 |
|           | MeOH              | 537      | 9400         | 594      | 1790 | 0.35 | 4.5                   | 0.8 | 1.4 |
| <b>4b</b> | Toluene           | 540, 576 | 14600, 15100 | 612      | 1020 | 0.44 | 5.3                   | 0.8 | 1.1 |
|           | THF               | 525, 563 | 12300, 12500 | 602      | 1150 | 0.25 | 5.4                   | 0.5 | 1.4 |
|           | CHCl <sub>3</sub> | 534, 570 | 13700, 14700 | 606      | 1040 | 0.42 | 5.8                   | 0.7 | 1.0 |
|           | DMF               | 519, 556 | 14800, 16100 | 598      | 1260 | 0.52 | 6.0                   | 0.9 | 0.8 |
|           | MeCN              | 514, 550 | 14900, 15900 | 594      | 1350 | 0.51 | 6.00                  | 0.9 | 0.8 |
|           | MeOH              | 332, 540 | 10800, 18600 | 591      | 1600 | 0.38 | 4.3                   | 0.9 | 1.4 |
| <b>4c</b> | Toluene           | 541, 577 | 11700, 12000 | 617, 659 | 1120 | 0.44 | 5.5                   | 0.8 | 1.0 |
|           | THF               | 531, 569 | 11500, 11800 | 611, 658 | 1210 | 0.46 | 5.7                   | 0.8 | 0.9 |
|           | CHCl <sub>3</sub> | 537, 574 | 11100, 11500 | 611, 655 | 1050 | 0.47 | 5.9                   | 0.8 | 0.9 |
|           | DMF               | 523, 560 | 11500, 12200 | 604, 635 | 1300 | 0.51 | 5.9                   | 0.9 | 0.8 |
|           | MeCN              | 519, 550 | 11700, 12200 | 600      | 1520 | 0.47 | 6.1                   | 0.8 | 0.9 |
|           | MeOH              | 544      | 13500        | 598      | 1660 | 0.37 | 4.6                   | 0.8 | 1.4 |
| <b>4d</b> | Toluene           | 555, 598 | 20900, 19800 | 638      | 1050 | 0.42 | 4.9                   | 0.9 | 1.2 |
|           | THF               | 547, 587 | 17600, 16600 | 626      | 1060 | 0.49 | 4.9                   | 1.0 | 1.0 |
|           | CHCl <sub>3</sub> | 546, 585 | 16300, 16200 | 625      | 1090 | 0.50 | 5.3                   | 0.9 | 0.9 |
|           | DMF               | 536, 571 | 17400, 17800 | 621      | 1410 | 0.54 | 5.3                   | 1.0 | 0.9 |
|           | MeCN              | 531, 562 | 15800, 15800 | 625      | 1790 | 0.59 | 5.7                   | 1.0 | 0.7 |
|           | MeOH              | 555      | 19400        | 620      | 1890 | 0.35 | 3.6                   | 1.0 | 1.8 |

|           |                   |          |              |          |      |      |                       |     |     |
|-----------|-------------------|----------|--------------|----------|------|------|-----------------------|-----|-----|
| <b>4e</b> | Toluene           | 573, 605 | 20300, 16200 | 664      | 1470 | 0.16 | 2.7                   | 0.6 | 3.1 |
|           | THF               | 566, 590 | 15400, 13100 | 654      | 1660 | 0.16 | 2.9                   | 0.6 | 2.9 |
|           | CHCl <sub>3</sub> | 566, 603 | 24800, 20700 | 652      | 1250 | 0.22 | 3.0                   | 0.7 | 2.6 |
|           | DMF               | 551      | 22400, 21200 | 659      | 2970 | 0.22 | 3.4                   | 0.6 | 2.3 |
|           | MeCN              | 546      | 19700        | 657      | 3090 | 0.19 | 2.9                   | 0.7 | 2.8 |
|           | MeOH              | 564      | 18200        | 657      | 2510 | 0.10 | 1.7                   | 0.6 | 5.3 |
| <b>4g</b> | Toluene           | 533, 565 | 17100, 14900 | 611, 656 | 1330 | 0.49 | 5.5                   | 5.5 | 5.5 |
|           | THF               | 521, 554 | 21600, 19000 | 604, 640 | 1490 | 0.51 | 5.9                   | 5.9 | 5.9 |
|           | CHCl <sub>3</sub> | 525, 558 | 15000, 13700 | 604, 654 | 1360 | 0.51 | 6.0                   | 6   | 6   |
|           | DMF               | 508, 541 | 21900, 19900 | 590, 628 | 1540 | 0.62 | 6.4                   | 6.4 | 6.4 |
|           | MeCN              | 505, 531 | 22800, 21000 | 589, 629 | 1850 | 0.49 | 6.3                   | 6.3 | 6.3 |
|           | MeOH              | 503, 521 | 25900, 25300 | 599      | 2500 | 0.25 | 3.9                   | 3.9 | 3.9 |
| <b>4h</b> | Toluene           | 568, 603 | 13100, 10600 | 667      | 1590 | 0.09 | 2.1                   | 0.4 | 4.3 |
|           | THF               | 555, 592 | 12300, 10200 | 667      | 1900 | 0.09 | 1.9                   | 0.5 | 4.8 |
|           | CHCl <sub>3</sub> | 555, 583 | 10700, 9200  | 656      | 1910 | 0.07 | 2.5                   | 0.3 | 3.7 |
|           | DMF               | 540, 573 | 13800, 11500 | 668      | 2480 | 0.15 | 2.8                   | 0.5 | 3.0 |
|           | MeCN              | 531, 559 | 13600, 12000 | 665      | 2850 | 0.13 | 2.4                   | 0.5 | 3.6 |
|           | MeOH              | 527      | 15100        | 660      | 3820 | 0.07 | 1.4                   | 0.5 | 6.6 |
| <b>4i</b> | Toluene           | 601, 650 | 16000, 15800 | 697      | 1040 | 0.19 | 2.5                   | 0.8 | 3.2 |
|           | THF               | 602, 634 | 18200, 17500 | 706      | 1610 | 0.14 | 2.5                   | 0.6 | 3.4 |
|           | CHCl <sub>3</sub> | 601, 644 | 13300, 14400 | 702      | 1280 | 0.27 | 2.9                   | 0.9 | 2.5 |
|           | DMF               | 619      | 17200        | 723      | 2320 | 0.15 | 5.6, 0.8 <sup>d</sup> | -   | -   |
|           | MeCN              | 607      | 18100        | 717      | 2530 | 0.11 | 1.1                   | 1.0 | 8.1 |
|           | MeOH              | 604      | 15900        | 710      | 2470 | 0.01 | - <sup>e</sup>        | -   | -   |

<sup>a</sup>Quantum yields determined using rhodamine 6g in EtOH. Quantum yields of selected samples were compared to those determined using an integrating sphere and negligible differences were observed.

<sup>b</sup> bi-exponential decay **3i** in DMF was observed with dominating 1 ns decay component.

<sup>c</sup> the emission intensity was very weak and the lifetime below the instrument resolution, which is attributed to specific interaction of **3i** with MeOH and strong molecule distortion resulting in the fast quenching of the excited state.

<sup>d</sup> bi-exponential decay of **4i** in DMF was observed with dominating 0.8ns decay component.

<sup>e</sup> the emission intensity was very weak and the lifetime below the instrument resolution, which is attributed to specific interaction of **4i** with MeOH and strong molecule distortion resulting in the fast quenching of the excited state.

#### Section S4: Absorption and Emission Spectra

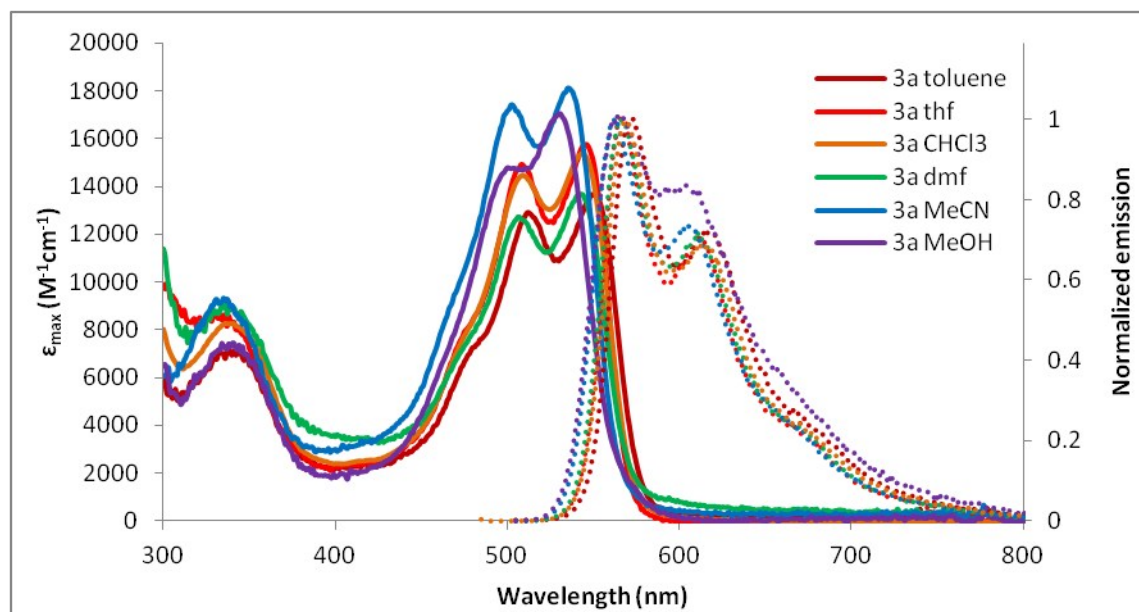

Figure S1. Absorption (solid lines) and emission (dashed lines) spectra of **3a** in various solvents.

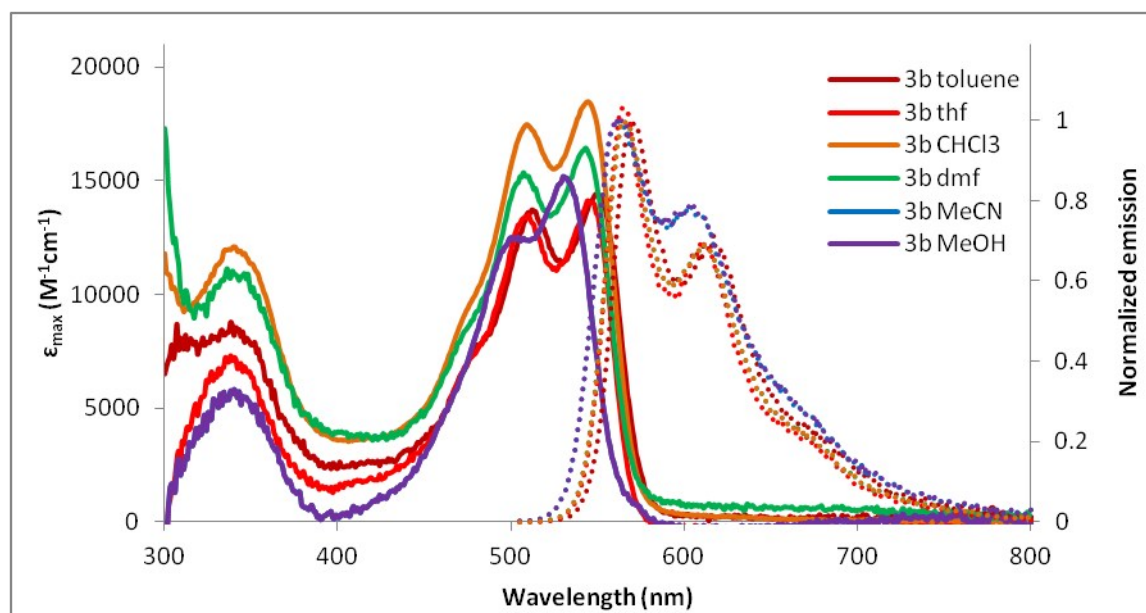

Figure S2. Absorption (solid lines) and emission (dashed lines) spectra of **3b** in various solvents.

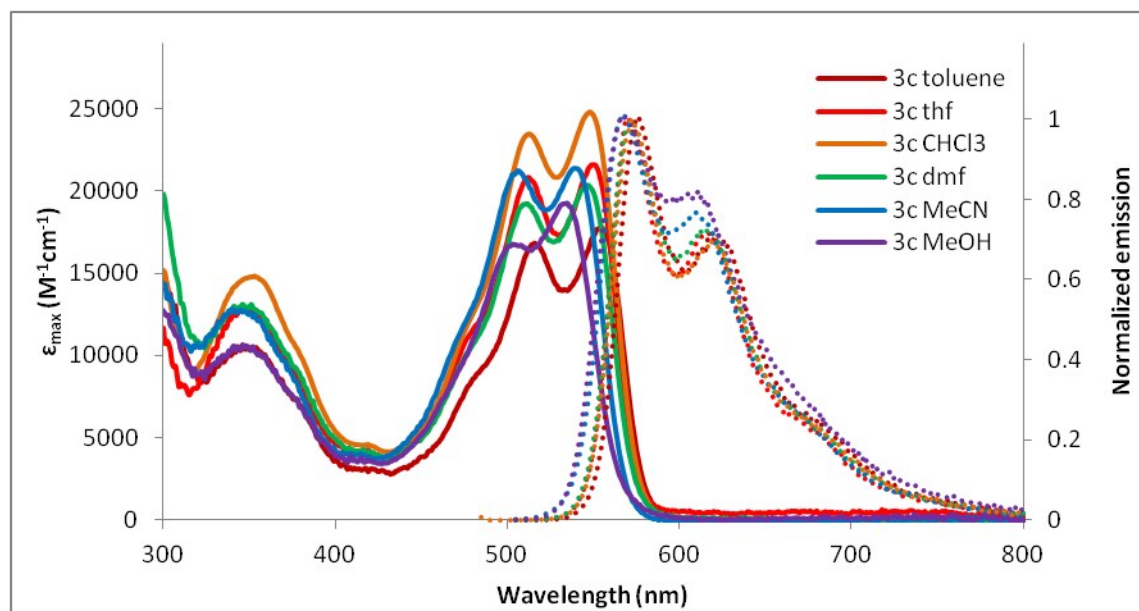

Figure S3. Absorption (solid lines) and emission (dashed lines) spectra of **3c** in various solvents.

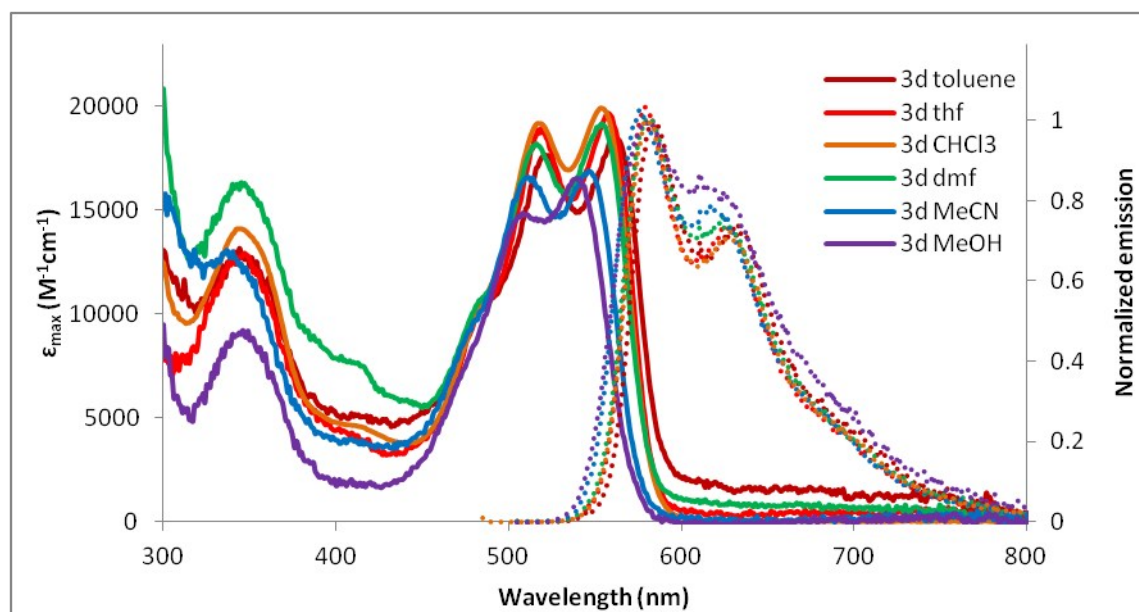

Figure S4. Absorption (solid lines) and emission (dashed lines) spectra of **3d** in various solvents.

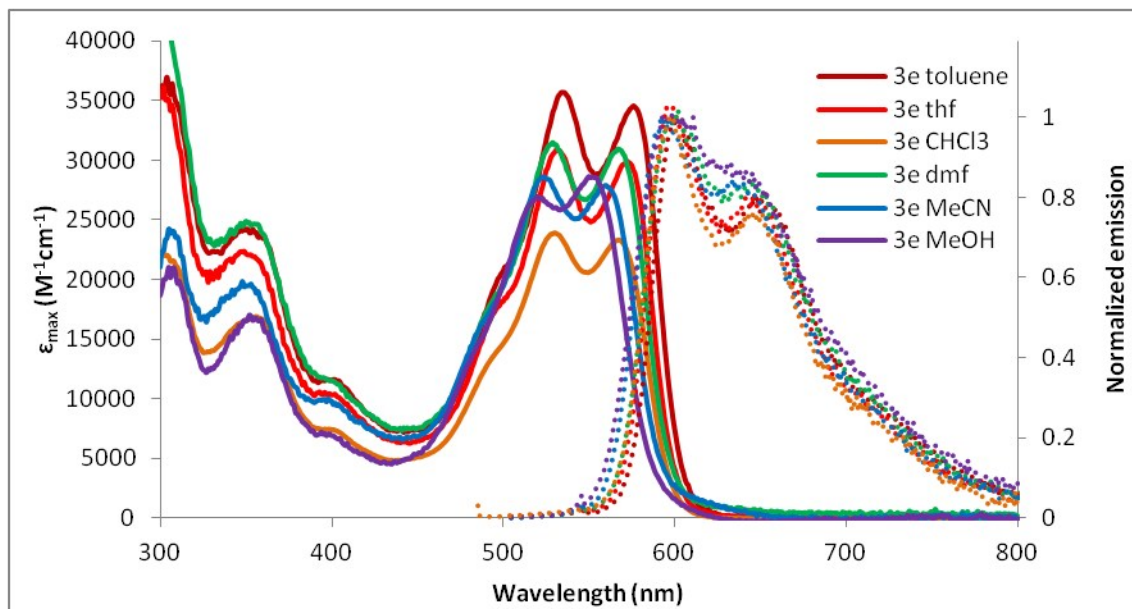

Figure S5. Absorption (solid lines) and emission (dashed lines) spectra of **3e** in various solvents.

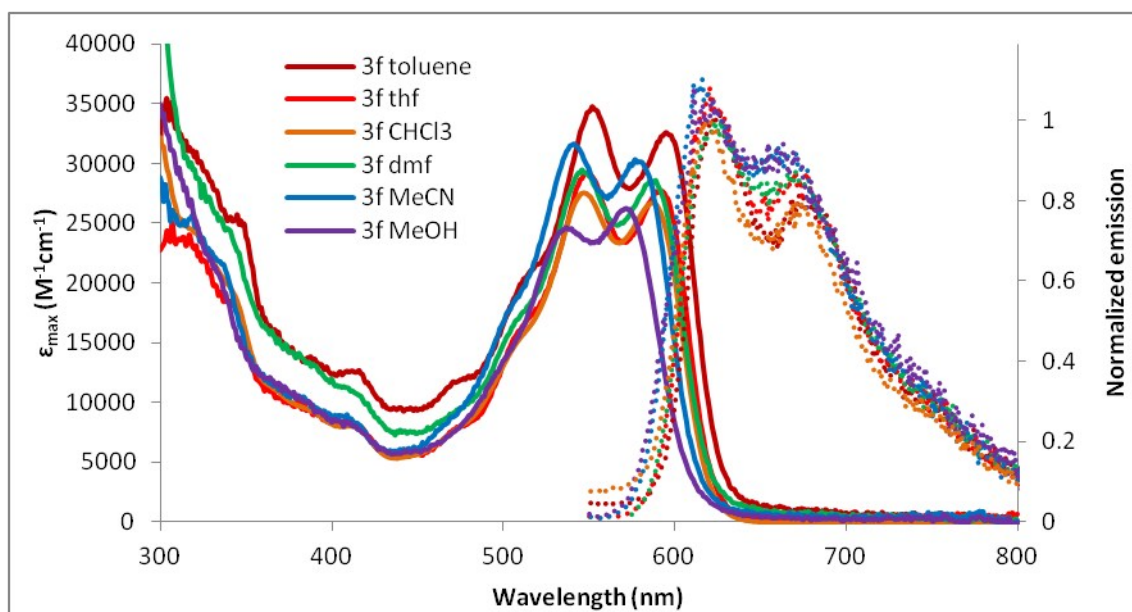

Figure S6. Absorption (solid lines) and emission (dashed lines) spectra of **3f** in various solvents.



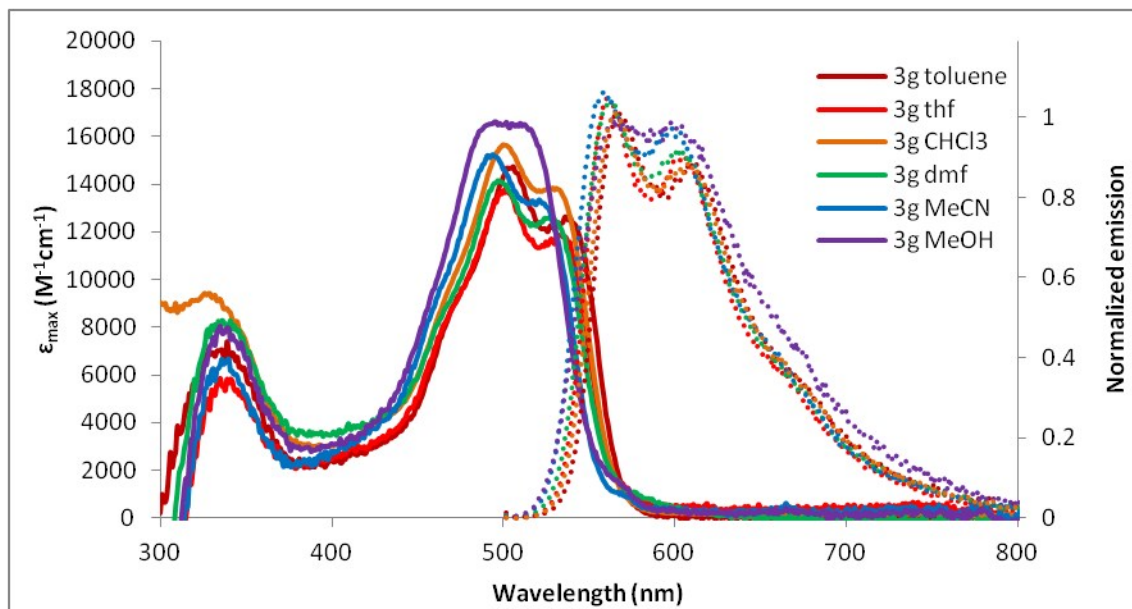

Figure S7. Absorption (solid lines) and emission (dashed lines) spectra of **3g** in various solvents.

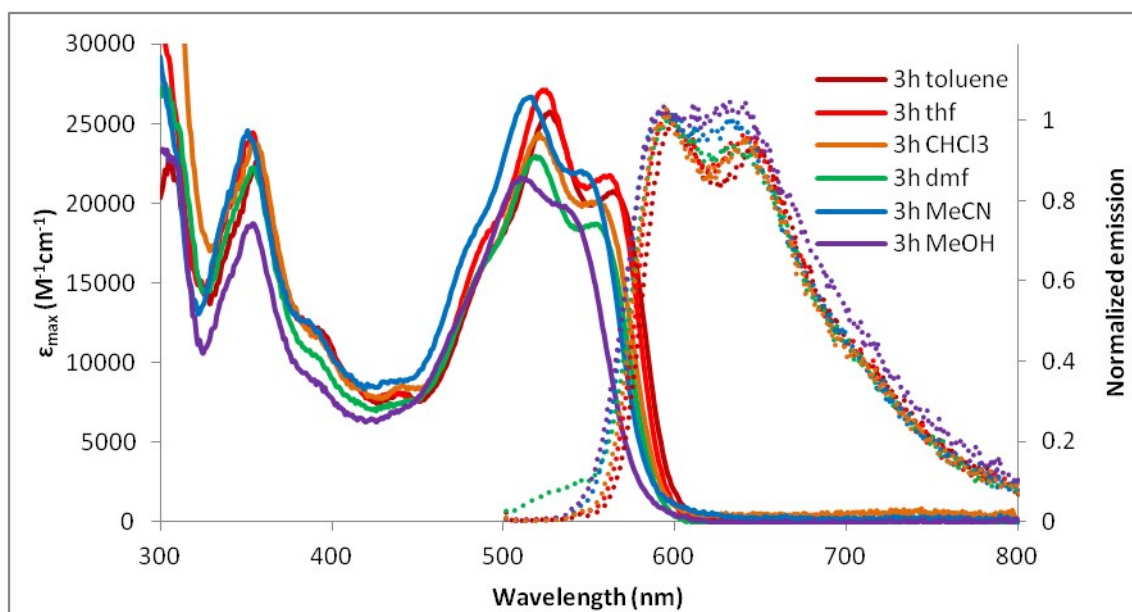

Figure S8. Absorption (solid lines) and emission (dashed lines) spectra of **3h** in various solvents.

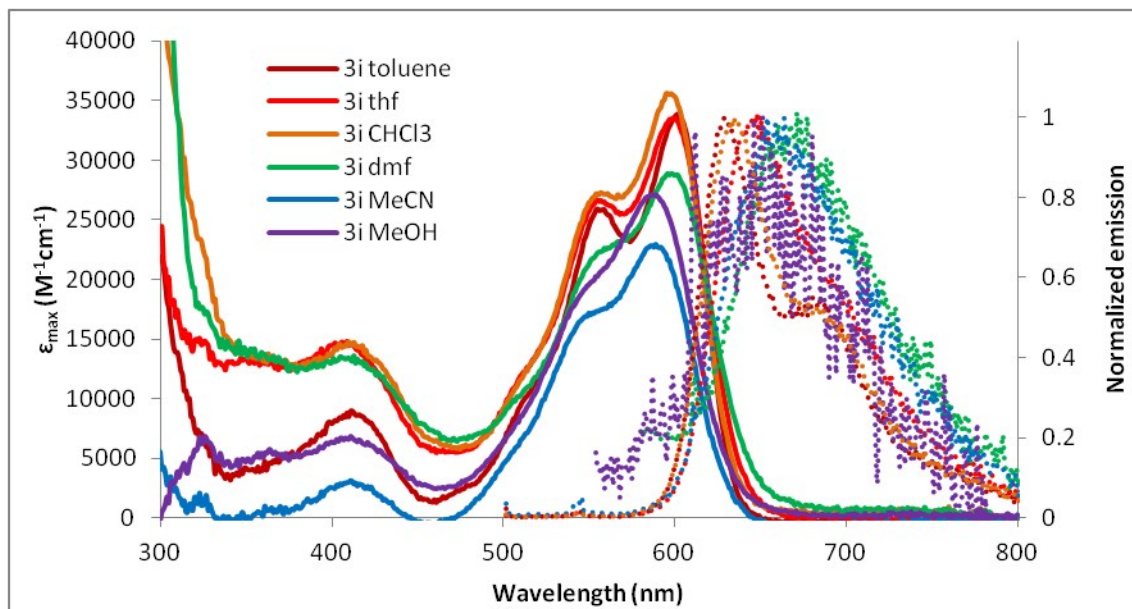

Figure S9. Absorption (solid lines) and emission (dashed lines) spectra of **3i** in various solvents.

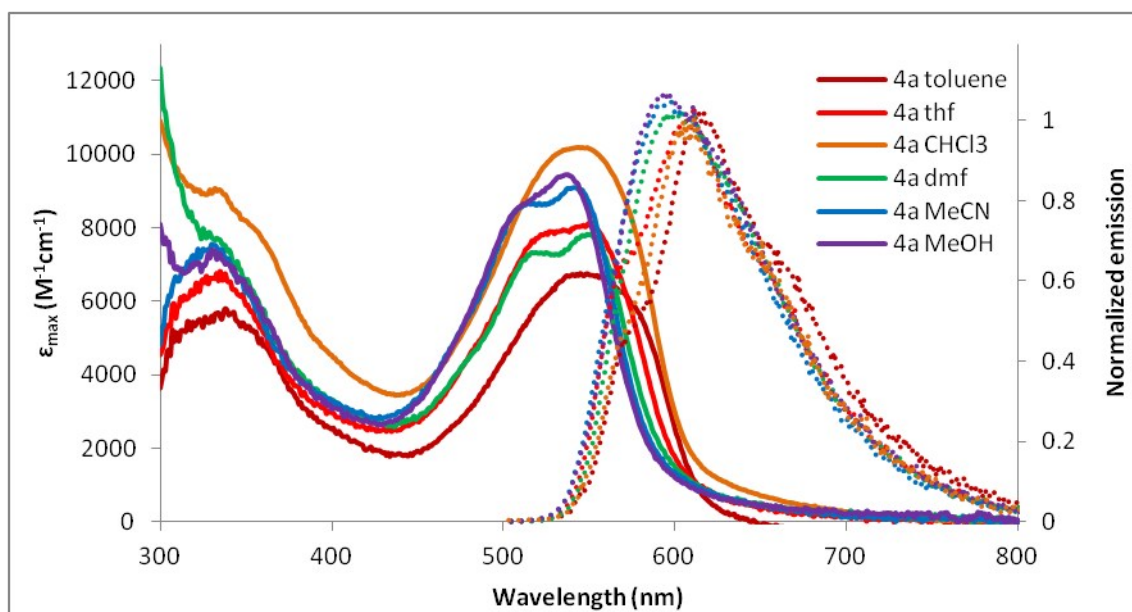

Figure S10. Absorption (solid lines) and emission (dashed lines) spectra of **4a** in various solvents.

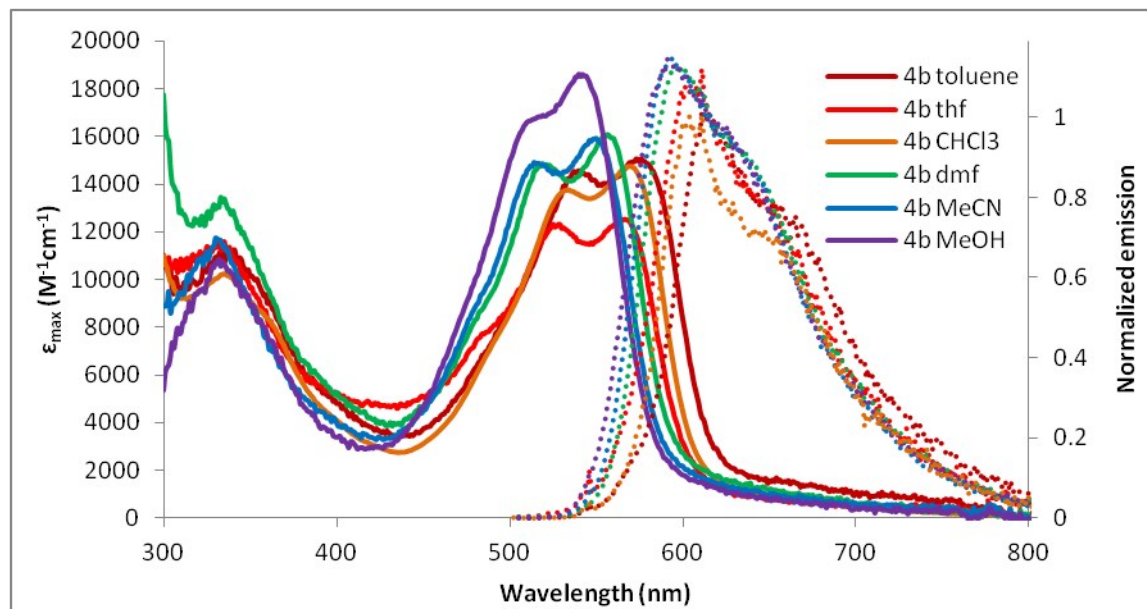

Figure S11. Absorption (solid lines) and emission (dashed lines) spectra of **4b** in various solvents.

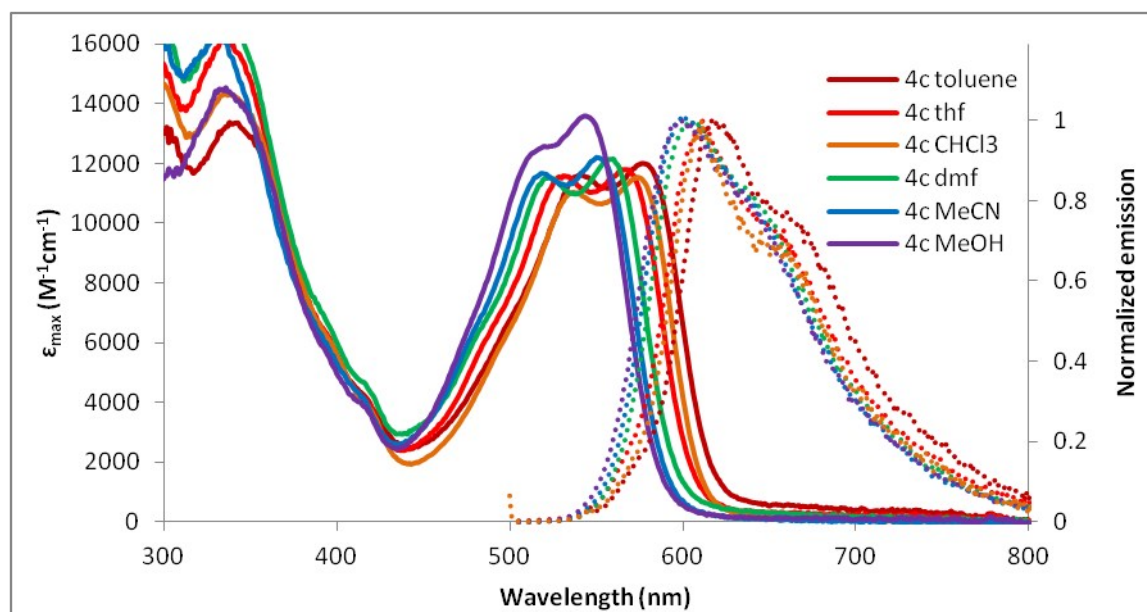

Figure S12. Absorption (solid lines) and emission (dashed lines) spectra of **4c** in various solvents.

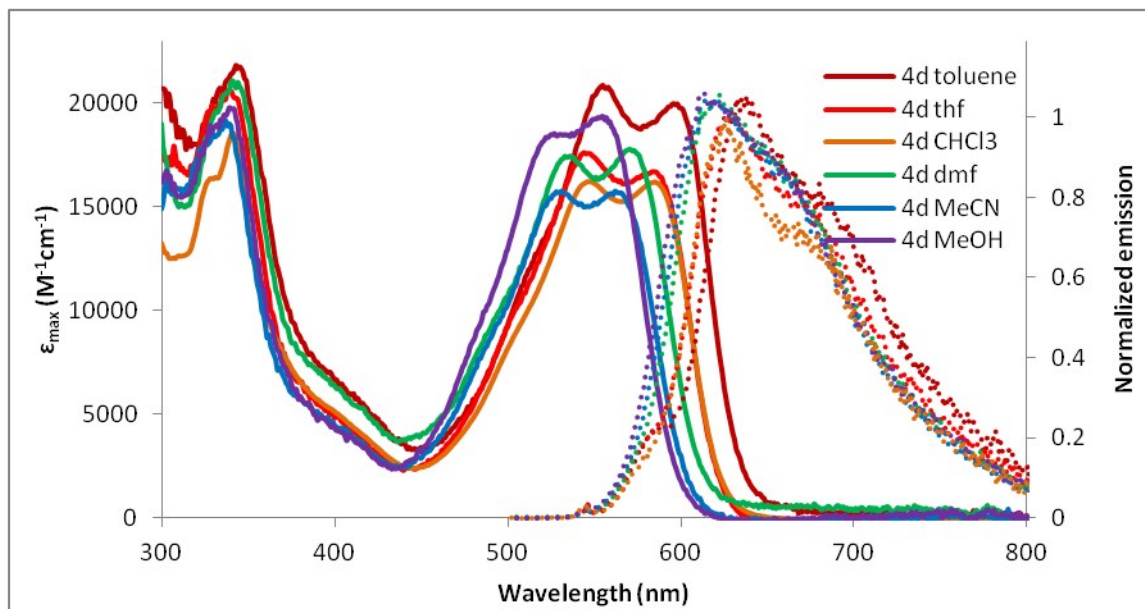

Figure S13. Absorption (solid lines) and emission (dashed lines) spectra of **4d** in various solvents.

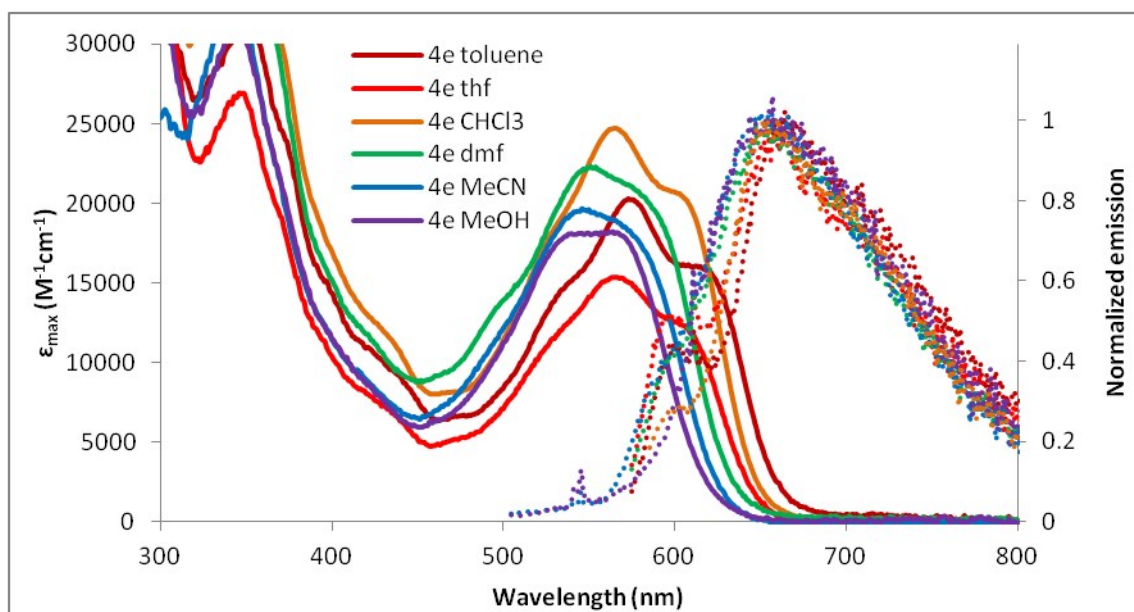

Figure S14. Absorption (solid lines) and emission (dashed lines) spectra of **4e** in various solvents.



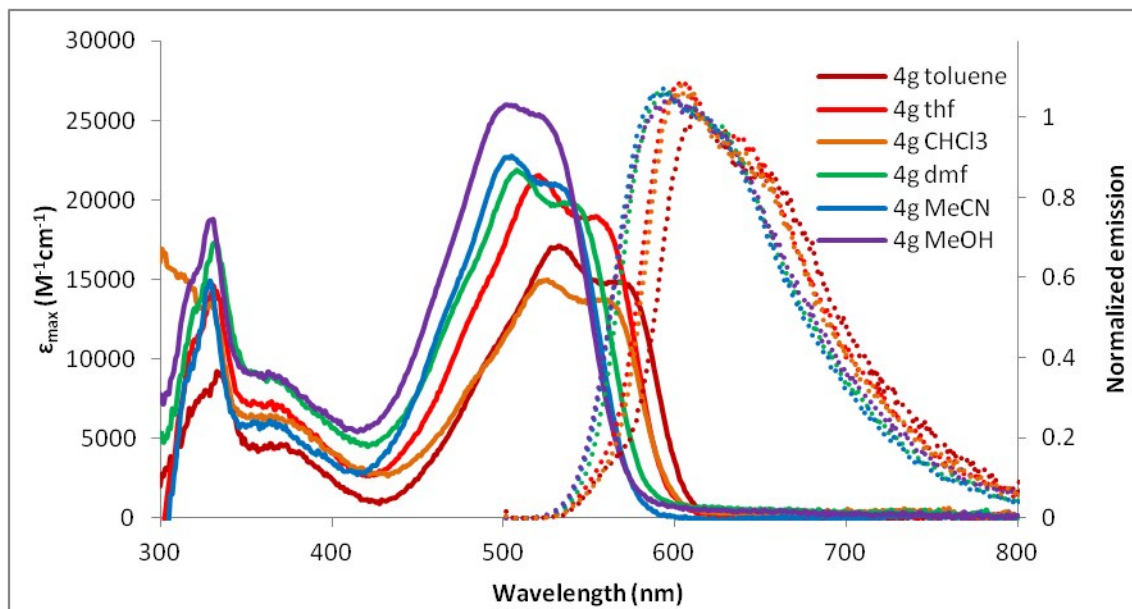

Figure S15. Absorption (solid lines) and emission (dashed lines) spectra of **4g** in various solvents.

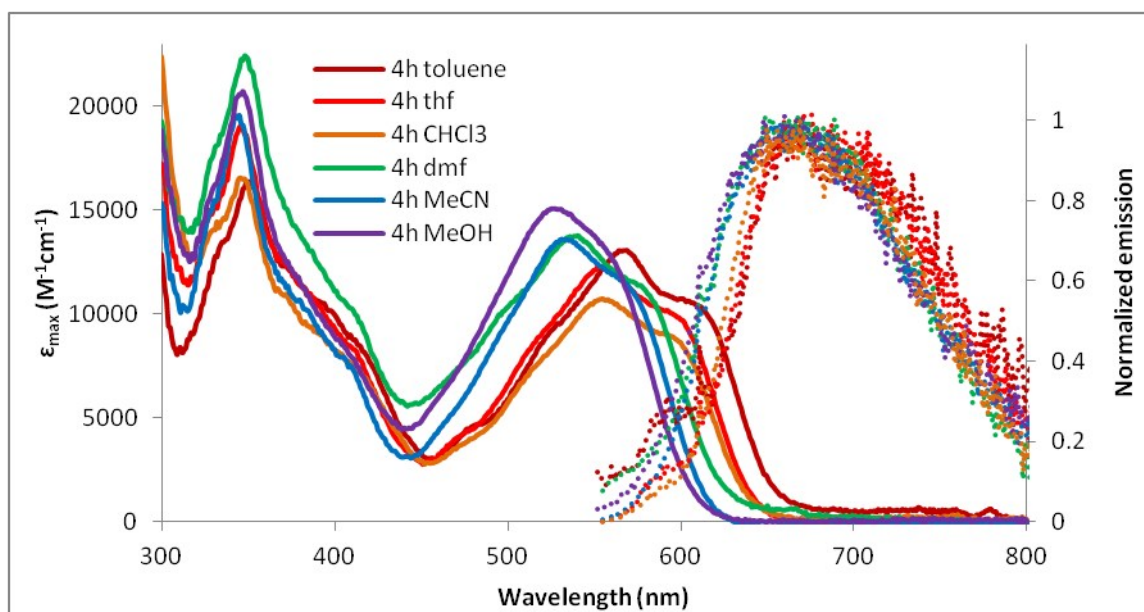

Figure S16. Absorption (solid lines) and emission (dashed lines) spectra of **4h** in various solvents.

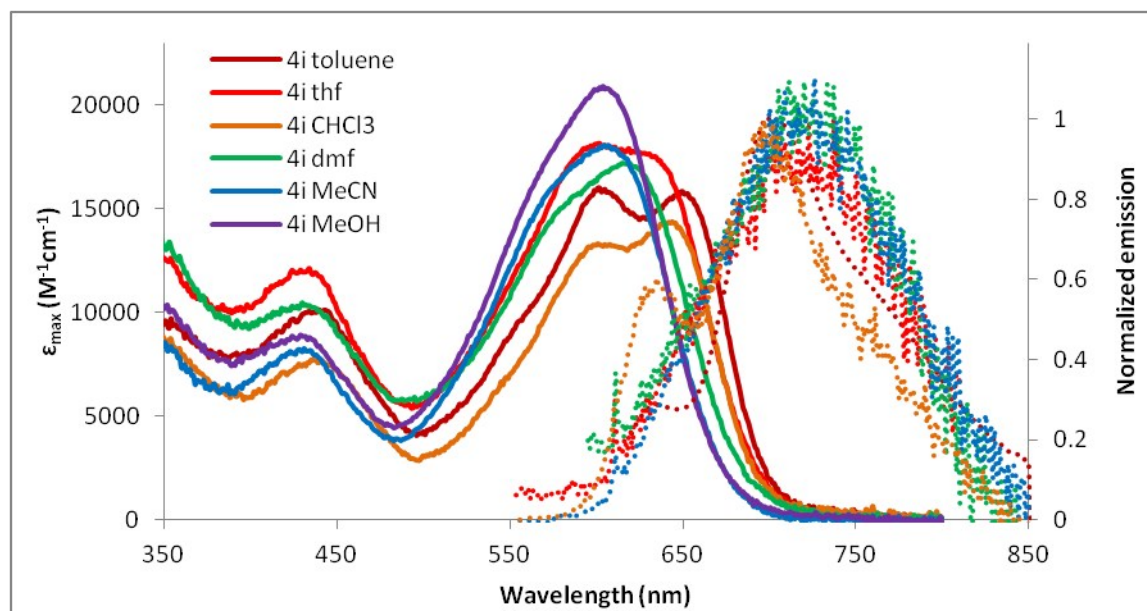

Figure S16. Absorption (solid lines) and emission (dashed lines) spectra of **4i** in various solvents.

## Section S5: Fluorescence Lifetime Measurements

Where two emission maxima were present, fluorescence lifetimes were measured and determined for both but in all cases only a negligible difference could be observed. Only the data recorded for the most intense emission maxima are presented here.

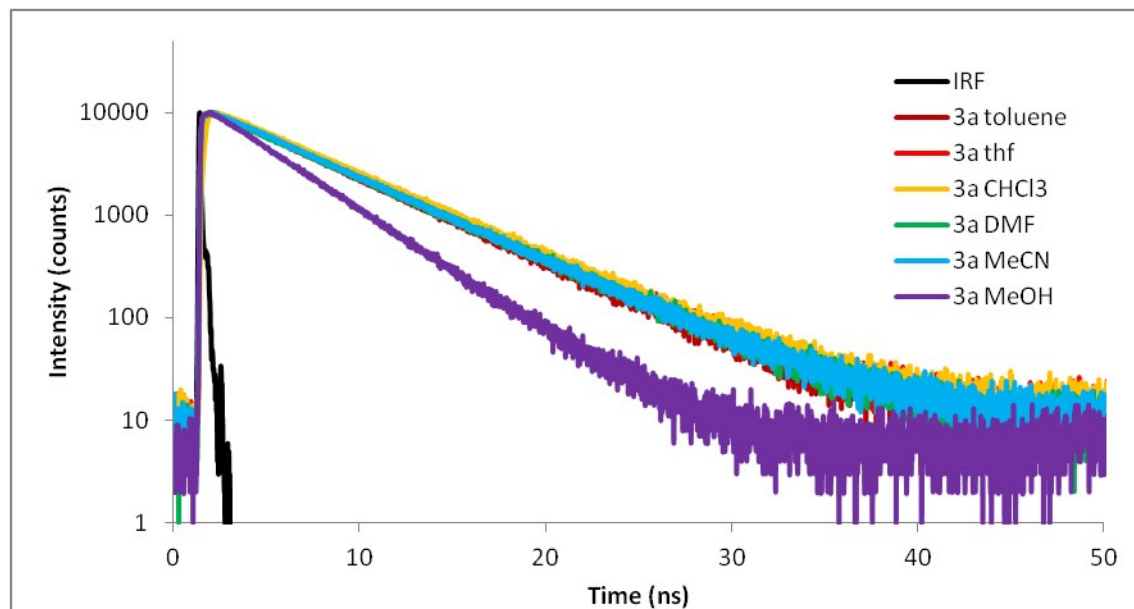

Figure S17. Fluorescence lifetime of **3a** in various solvents.

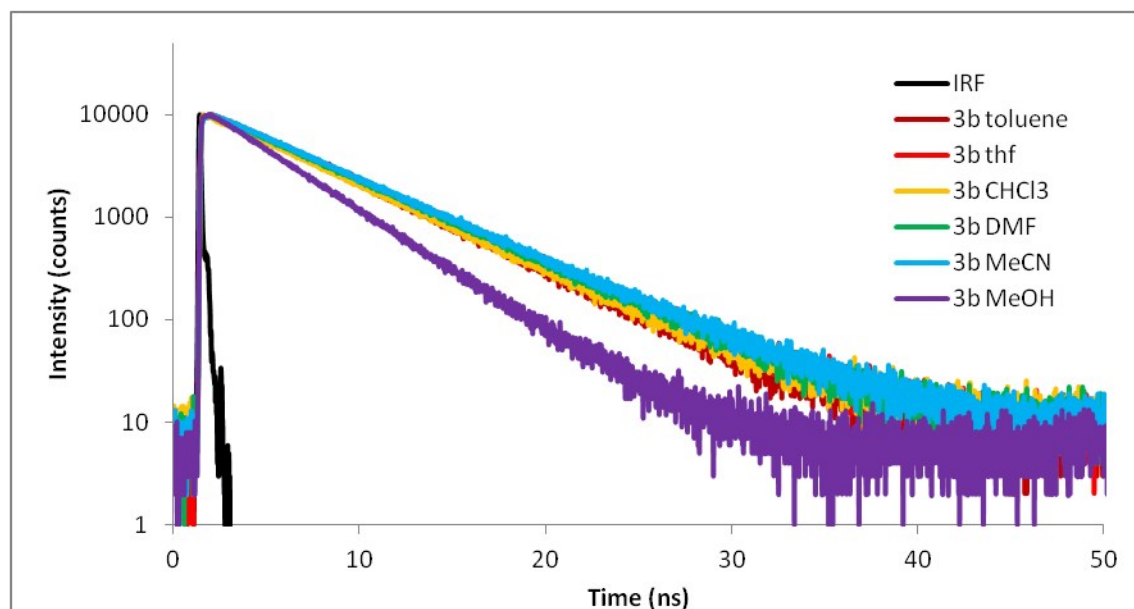

Figure S18. Fluorescence lifetime of **3b** in various solvents.

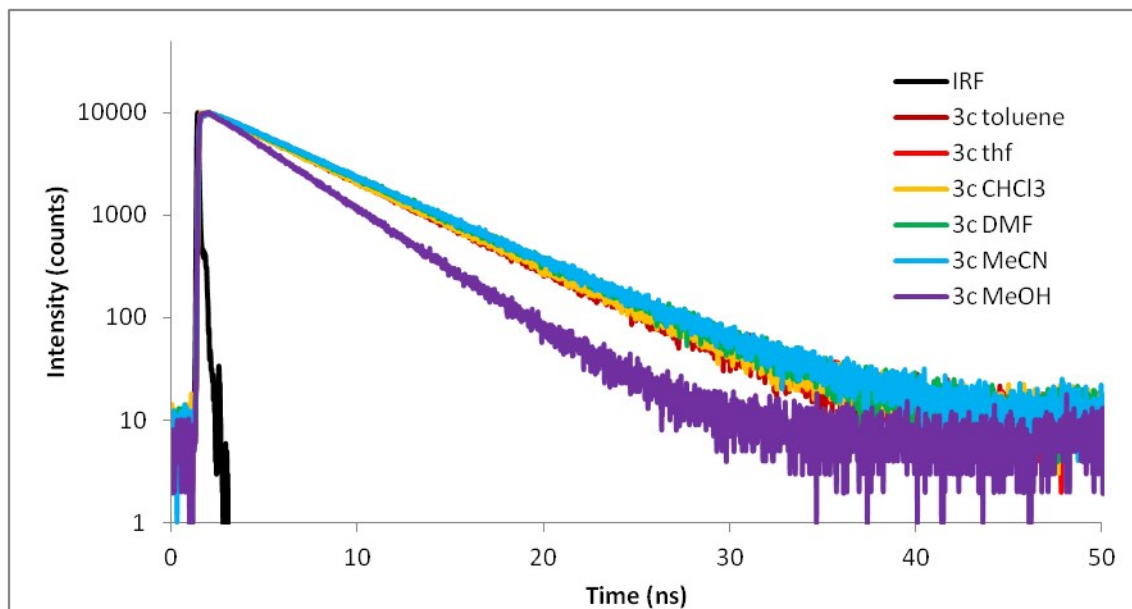

Figure S19. Fluorescence lifetime of **3c** in various solvents.

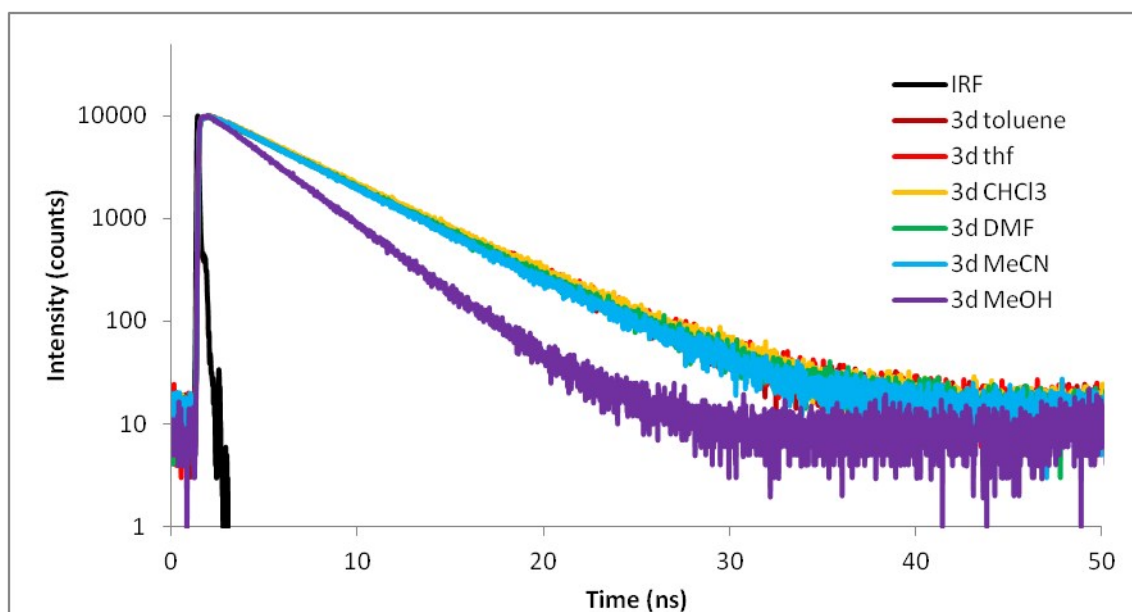

Figure S20. Fluorescence lifetime of **3d** in various solvents.



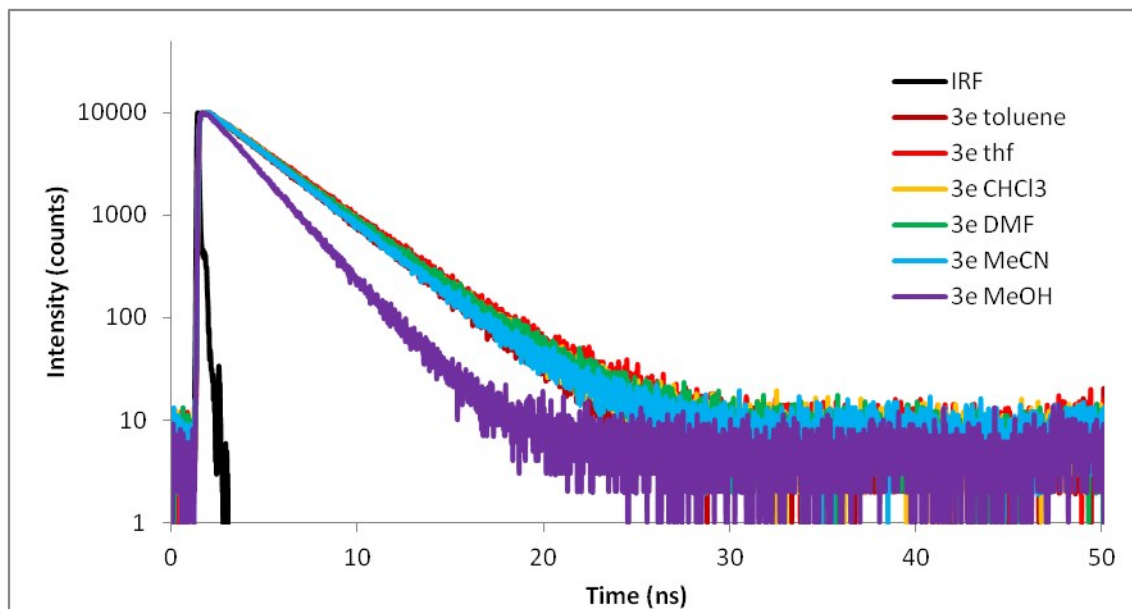

Figure S21. Fluorescence lifetime of **3e** in various solvents.

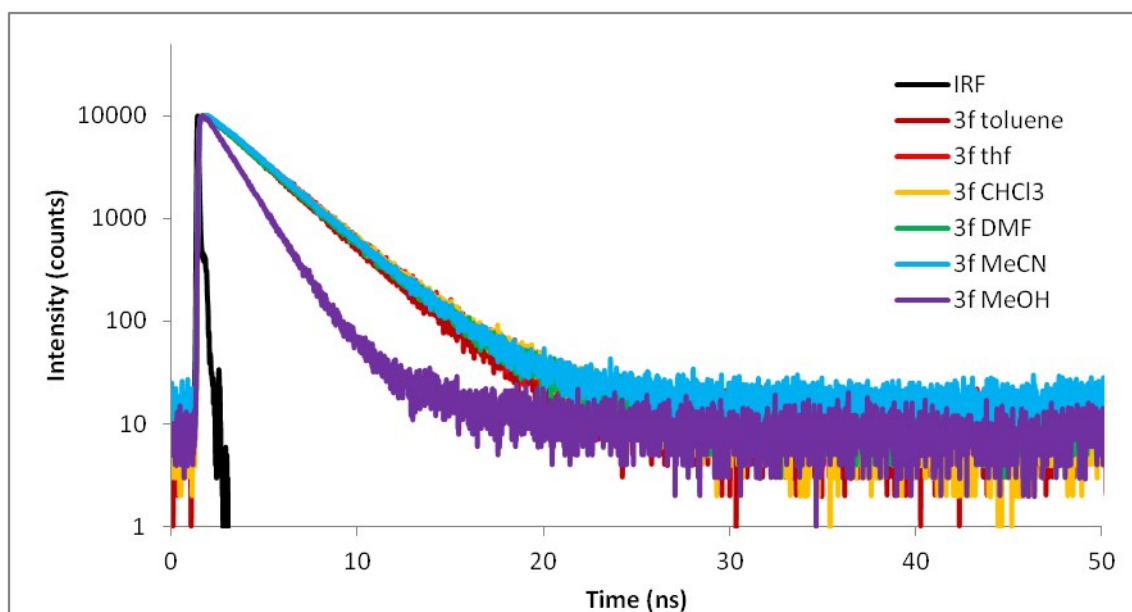

Figure S22. Fluorescence lifetime of **3f** in various solvents.

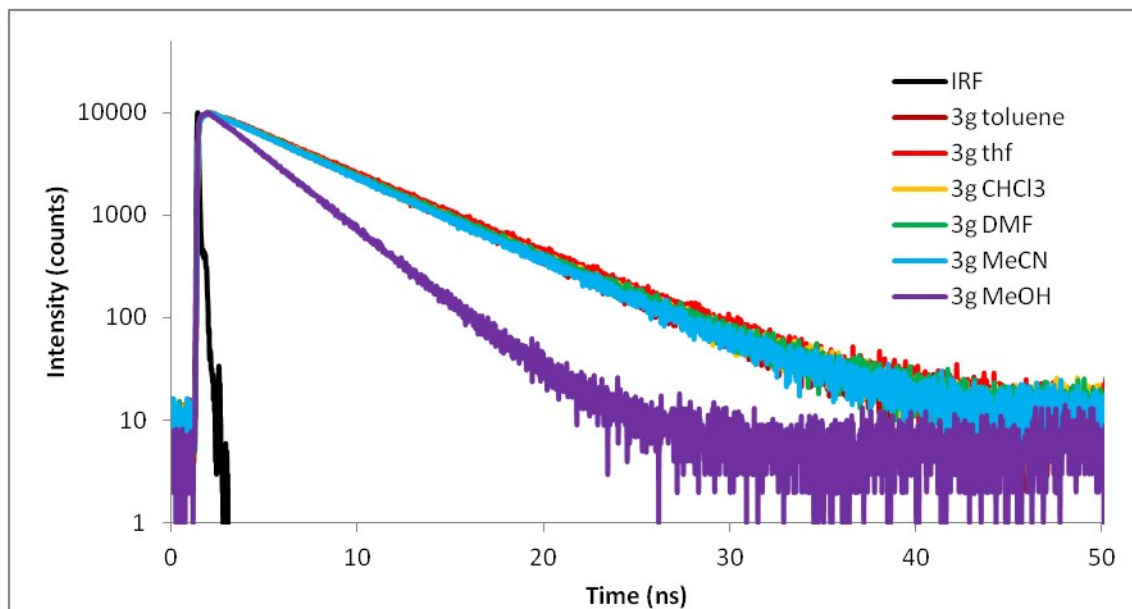

Figure S23. Fluorescence lifetime of **3g** in various solvents.

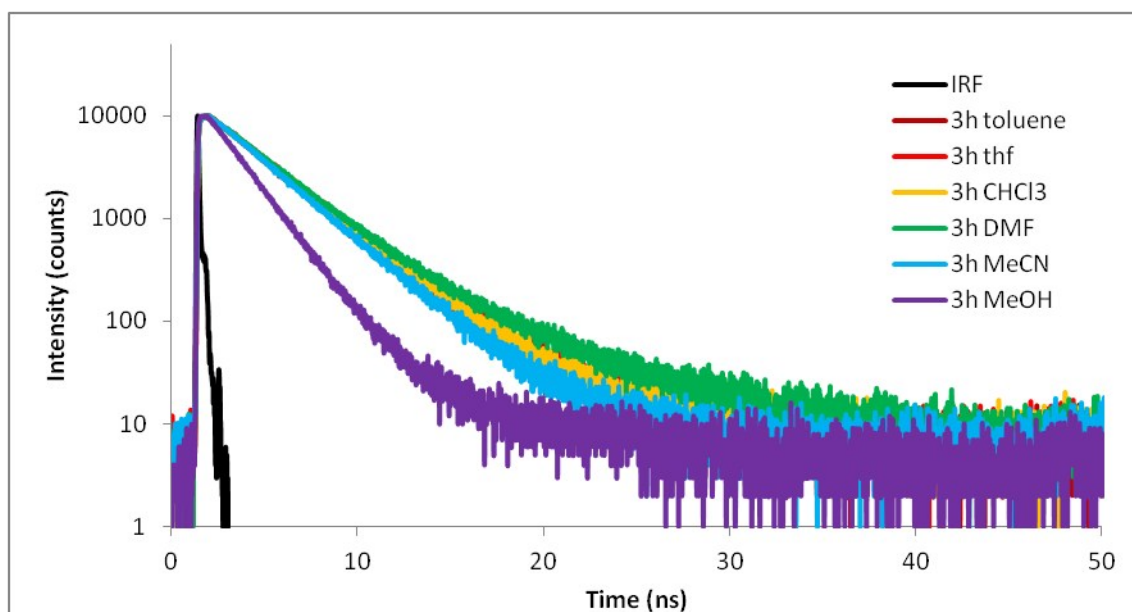

Figure S24. Fluorescence lifetime of **3h** in various solvents.

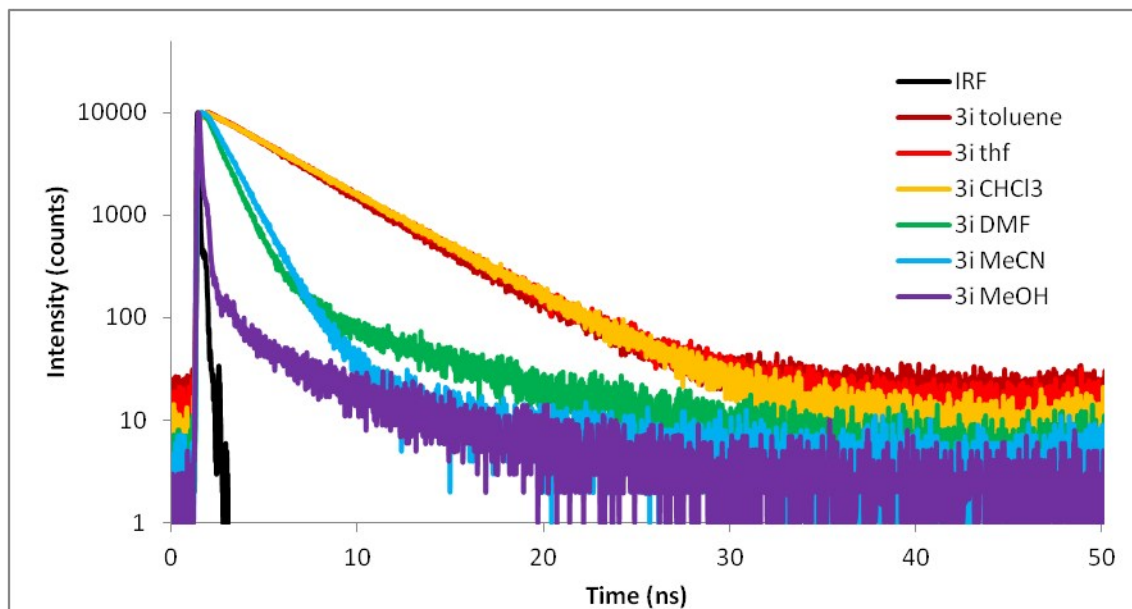

Figure S25. Fluorescence lifetime of **3i** in various solvents.

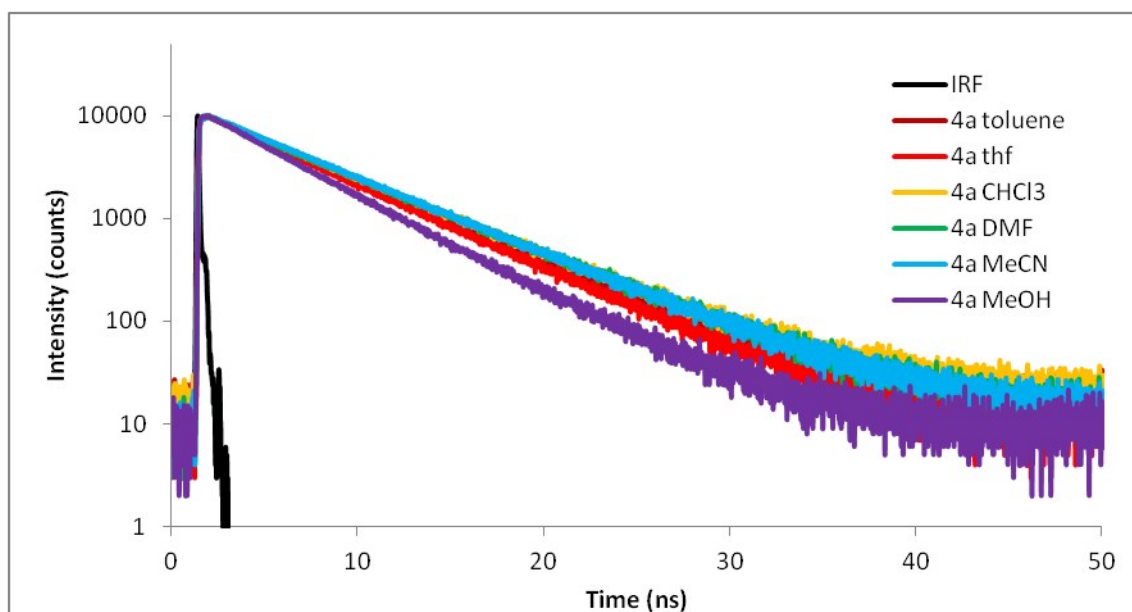

Figure S26. Fluorescence lifetime of **4a** in various solvents.

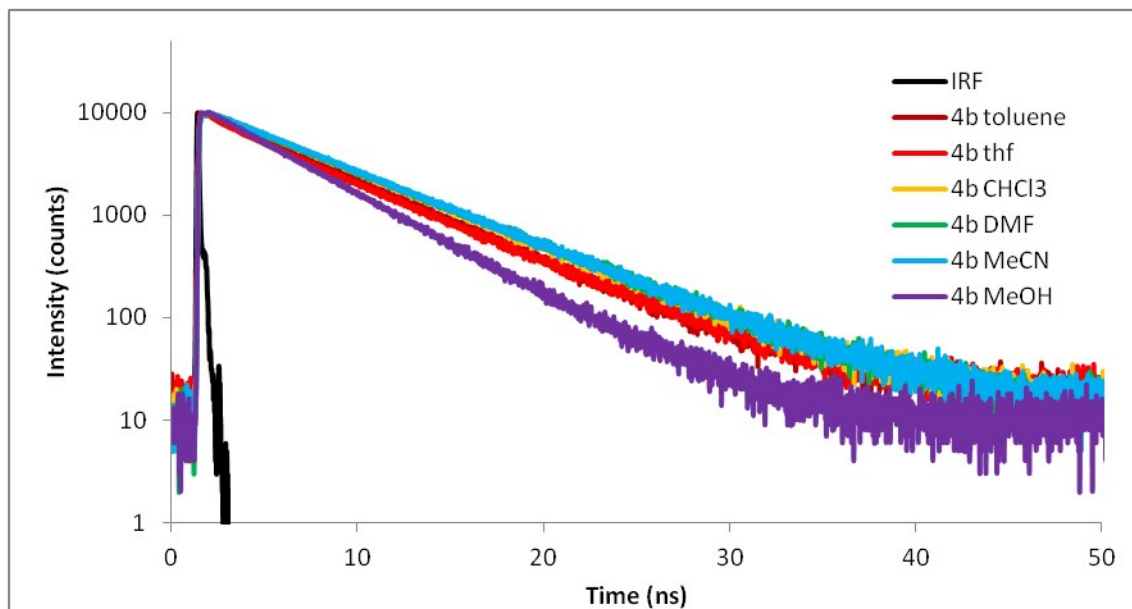

Figure S27. Fluorescence lifetime of **4b** in various solvents.

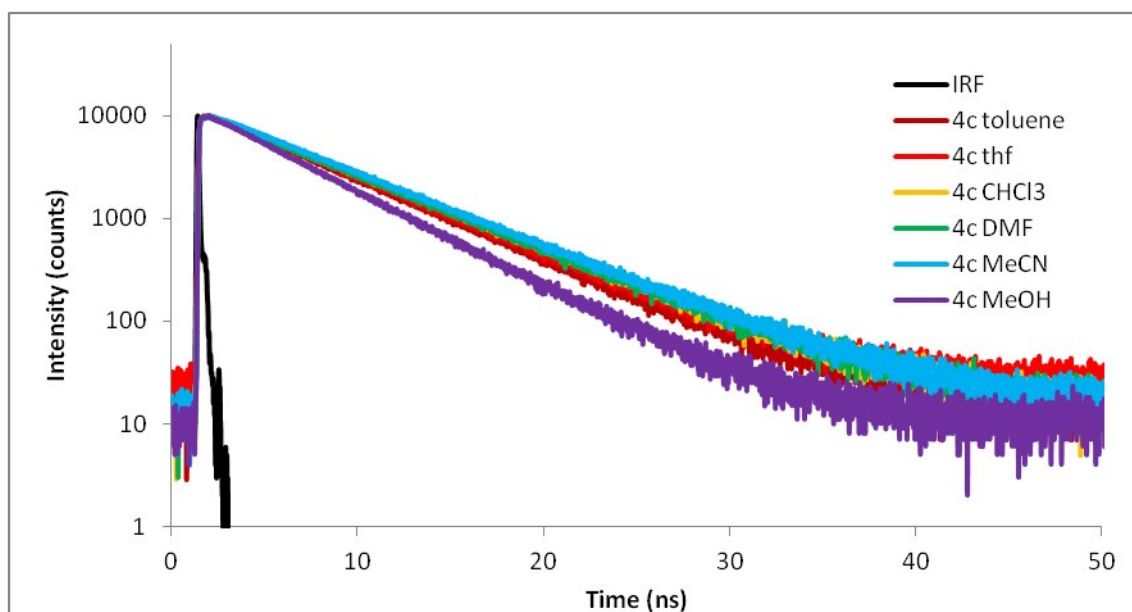

Figure S28. Fluorescence lifetime of **4c** in various solvents.

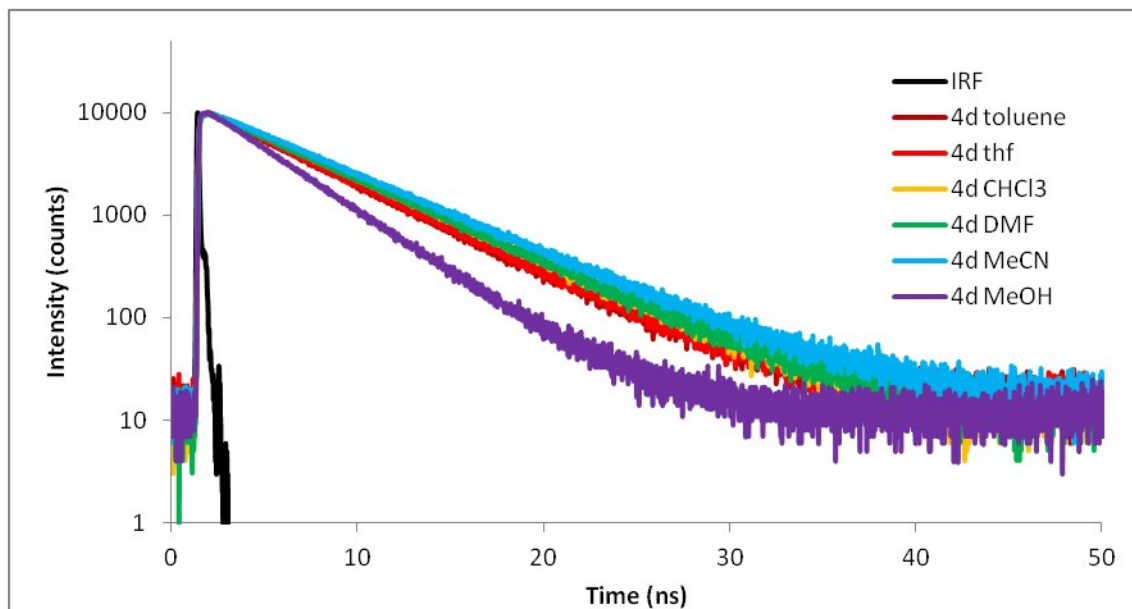

Figure S29. Fluorescence lifetime of **4d** in various solvents.

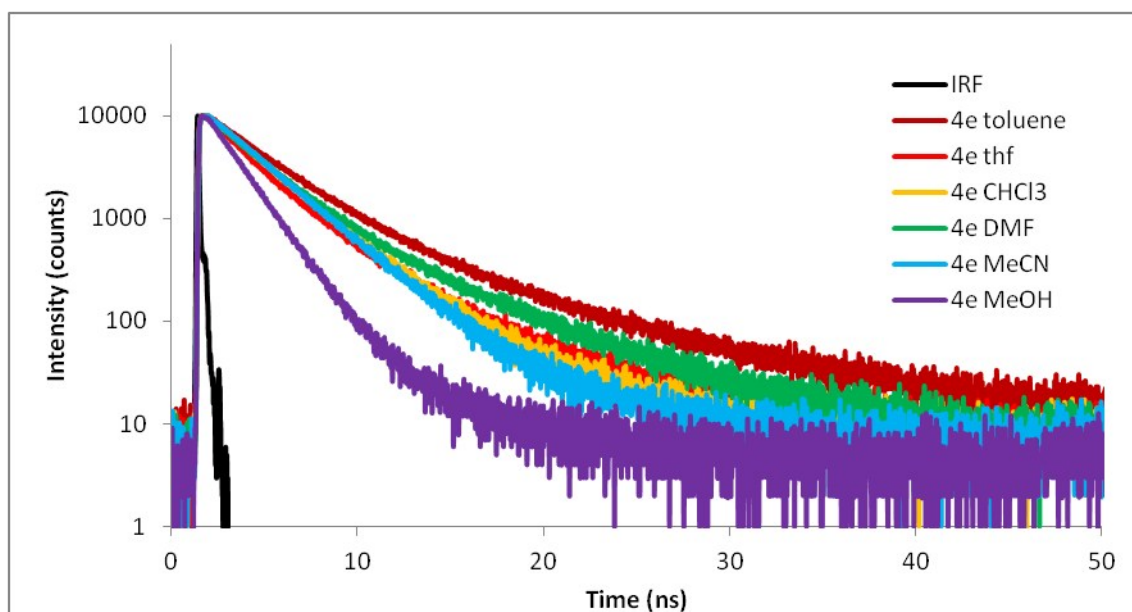

Figure S30. Fluorescence lifetime of **4e** in various solvents.

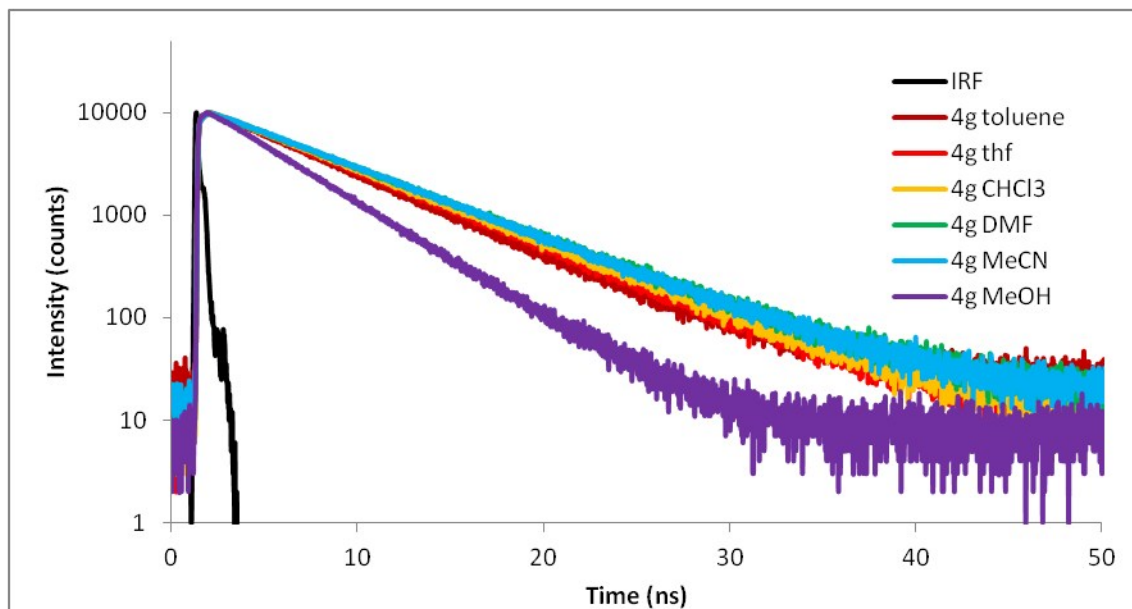

Figure S31. Fluorescence lifetime of **4g** in various solvents.

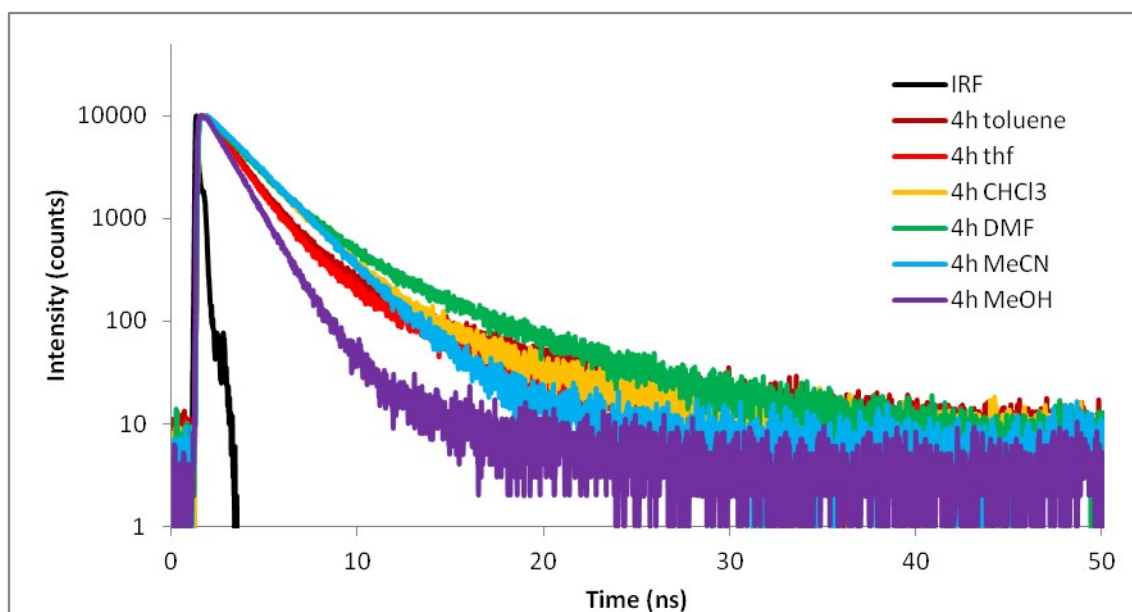

Figure 32 Fluorescence lifetime of **4h** in various solvents.

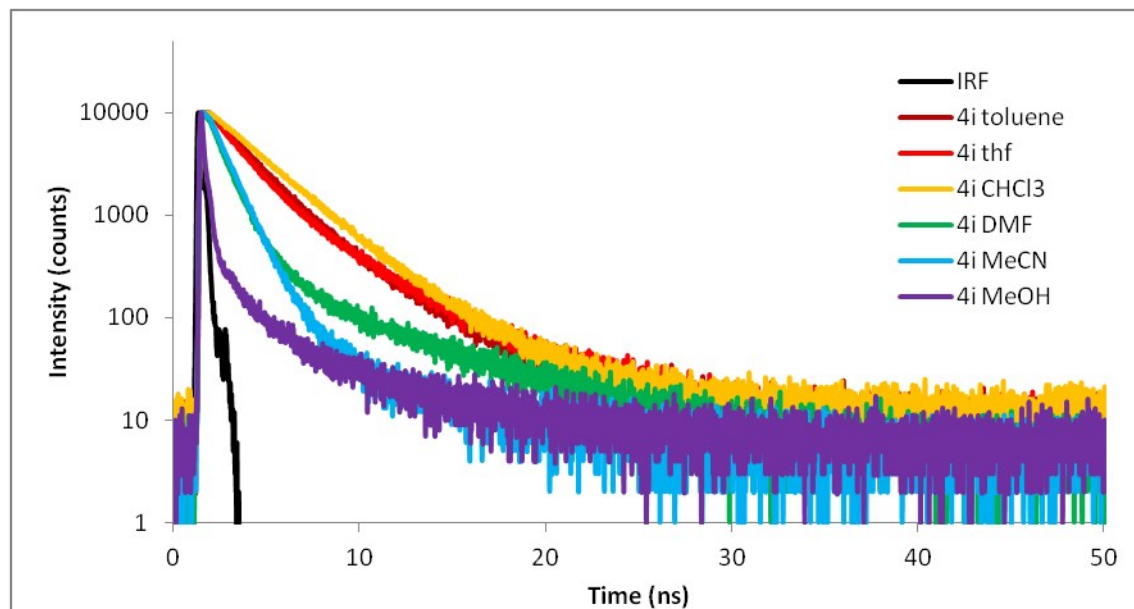

Figure S33. Fluorescence lifetime of **4i** in various solvents.



## Section S6: X-Ray Analysis

Crystals of **3d** are very thin, easy to bend, dark red coloured plates. Crystals were grown through slow evaporation of a DCM/MeOH solution containing **3d**. A suitable sample was measured on a Bruker D8 Venture single crystal diffractometer. Data were processed with help of Bruker software<sup>6</sup> and refined using the SHELX software package.<sup>7,8</sup> CCDC 1983938 contains the supplementary crystallographic data for this paper. The data can be obtained free of charge from The Cambridge Crystallographic Data Centre via [www.ccdc.cam.ac.uk/structures](http://www.ccdc.cam.ac.uk/structures). The compound crystallizes in the monoclinic system  $P2/c$  with two molecules in the asymmetric unit. Views along each of the crystallographic axes can be seen in Figure S34.

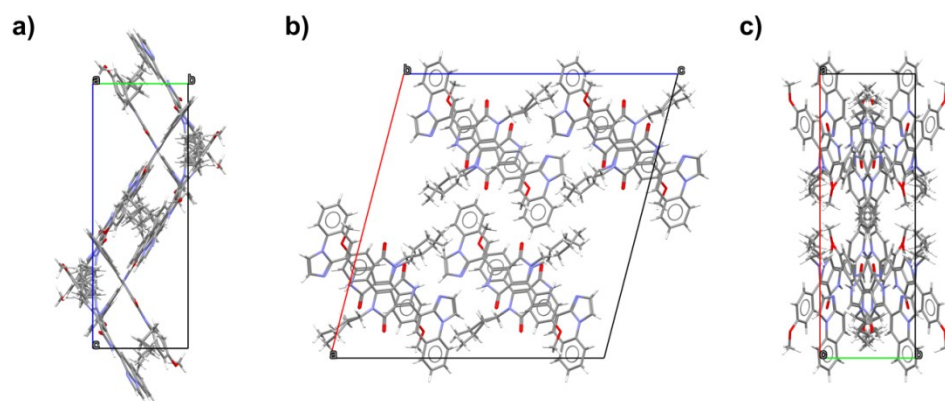

Figure S34. Views along the crystallographic  $a$  (a),  $b$  (b) and  $c$  (c) axes of **3d**.

In the asymmetric unit cell two molecules (denoted as A and B) of **3d** are present. Both of these species contain  $n$ butyl chains disordered over two alternative sites. In the molecule A, the alkyl substituted pyrrole skeleton also seems to be disordered. Both molecules A and B have similar geometry, however, slightly different orientations of the planar substituents around the diketopyrrolopyrrole (DPP) unit are observed. Indeed the angle between the LSQ mean planes<sup>9</sup> fitted to all heavy atoms in the DPP core, imidazo[1,5 $a$ ]quinoline and  $p$ methoxyphenyl moieties are equal to 1.2°, 7.0° and 5.9°, 18.7° for the molecule A and B respectively. In the crystal lattice the molecules are arranged in ...ABAB... columns in the [010] direction. In these columns the shortest distances between DPP LSQ plane of molecule B and atoms in neighbouring molecules A yields 3.38 Å and 3.45 Å which is presented in Figure S35. The arrangement of the molecules in stacks is responsible for the elongated shape of the crystals in one direction.

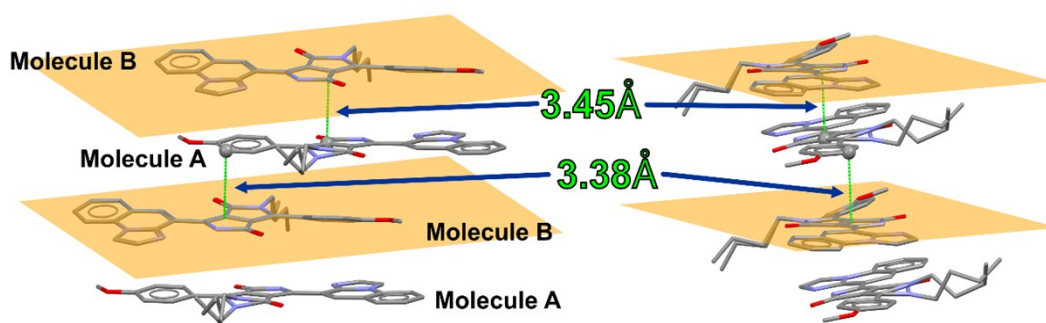

Figure S35. Stacking of molecules in the crystal structure of **3d**.



## Section S7: Theoretical Methods

To model the ground and excited state properties of the compounds, we use a protocol based on Time-Dependent Density Functional Theory (TD-DFT) level to determine the transition energies as well as the geometries and vibrations of all states, whereas the environmental effects are accounted for using the well-known Polarizable Continuum Model (PCM). This protocol has been described and tested elsewhere.<sup>10</sup> In all compounds the butyl chains on the DPP core are replaced by methyl groups during the calculations for decreased computational effort. No other simplification is made. All (TD-)DFT calculations are made with the Gaussian16.A03 program.<sup>11</sup> During these calculations, we use tightened self-consistent field ( $10^{-10}$  a.u.) and geometry optimization ( $10^{-5}$  a.u.) convergence thresholds, and a large DFT integration grid (so-called *ultrafine* grid, a pruned 99,590 grid). The DFT and TD-DFT calculations are performed with the M06-2X *meta*-GGA hybrid functional.<sup>12</sup> Given that the excited-states are not of cyanine nature, as in (isolated) BODIPYs, we have not applied post-Hartree-Fock corrections here.<sup>13</sup> Following a published protocol,<sup>10</sup> the 6-31+G(d) atomic basis set is used for geometries and vibrations whereas 6-311+G(2d,p) is used for the transition energies. The nature of the ground-state and excited-state stationary points is systematically confirmed by analytical Hessian calculations. The impact of the environment is taken into account at all DFT and TD-DFT steps by using the PCM model.<sup>14</sup> For both absorption and emission the LR+cLR<sup>15</sup> model in its *non-equilibrium* limit is applied. This model allows the recovery of both linear-response and state-specific solvent effects and is thus well suited for the bright transitions with a significant CT character as investigated here.

Table S2 displays additional theoretical results including computed vertical absorption and emission wavelengths as well as adiabatic energies and difference of zero-point vibrational energies between the ground and excited states.

Table S2: Computed vertical transition energies, adiabatic energies, zero point corrections and 0-0 energies at the cLR+LR-PCM(neq)-M06-2X/6-311+G(2d,p) level. All values are in eV.

| Compound  | $\Delta E^{\text{abs}}$ | $\Delta E^{\text{ems}}$ | $\Delta E^{\text{adia}}$ | $\Delta(\text{ZPVE})$ | $\Delta E^{0-0}$ |
|-----------|-------------------------|-------------------------|--------------------------|-----------------------|------------------|
| <b>3a</b> | 2.562                   | 2.034                   | 2.282                    | -0.060                | 2.221            |
| <b>4a</b> | 2.492                   | 1.954                   | 2.184                    | -0.057                | 2.127            |
| <b>3b</b> | 2.565                   | 2.042                   | 2.289                    | -0.061                | 2.227            |
| <b>4b</b> | 2.507                   | 1.963                   | 2.199                    | -0.058                | 2.141            |
| <b>3c</b> | 2.552                   | 2.021                   | 2.270                    | -0.060                | 2.210            |
| <b>4c</b> | 2.484                   | 1.941                   | 2.178                    | -0.054                | 2.124            |
| <b>3d</b> | 2.516                   |                         |                          |                       |                  |
| <b>4d</b> | -                       | -                       | -                        | -                     | -                |
| <b>3e</b> | 2.486                   | 1.947                   | 2.198                    | -0.056                | 2.142            |
| <b>4e</b> | 2.411                   | 1.846                   | 2.093                    | -0.058                | 2.035            |
| <b>3f</b> | 2.417                   | 1.878                   | 2.128                    | -0.056                | 2.072            |
| <b>4f</b> | 2.352                   | 1.774                   | 2.026                    | -0.056                | 1.969            |
| <b>3g</b> | 2.594                   | 2.050                   | 2.302                    | -0.063                | 2.238            |
| <b>4g</b> | 2.524                   | 1.966                   | 2.202                    | -0.059                | 2.143            |
| <b>3h</b> | 2.516                   | 1.960                   | 2.216                    | -0.055                | 2.160            |
| <b>4h</b> | 2.440                   | 1.853                   | 2.108                    | -0.061                | 2.047            |
| <b>3i</b> | 2.373                   | 1.853                   | 2.091                    | -0.051                | 2.040            |
| <b>4i</b> | 2.278                   | 1.736                   | 1.970                    | -0.053                | 1.917            |

Table S3: Computed dipole moments for the ground and excited states of selected compounds on the ground-state geometry. All values are in D. At the right-hand side, we provide the change of dipole moment between the two states, as computed from the individual Cartesian components. These values correspond to  $\mu^{\text{CT}} = q^{\text{CT}} \times d^{\text{CT}}$  in Le Bahers' model.

| Compound  | $S_0$   |         |         |                    | $S_1$   |         |         |                    | $\Delta\mu^{\text{CT}}$ |
|-----------|---------|---------|---------|--------------------|---------|---------|---------|--------------------|-------------------------|
|           | $\mu_x$ | $\mu_y$ | $\mu_z$ | $\mu_{\text{tot}}$ | $\mu_x$ | $\mu_y$ | $\mu_z$ | $\mu_{\text{tot}}$ |                         |
| <b>3a</b> | 2.47    | 1.78    | -0.45   | 3.08               | 0.41    | 1.30    | -0.44   | 1.44               | 2.11                    |
| <b>4a</b> | 6.70    | 5.73    | -0.12   | 8.82               | 2.06    | 4.88    | -0.18   | 5.30               | 4.73                    |
| <b>3e</b> | 1.95    | 2.76    | -0.44   | 3.41               | -1.1    | 1.64    | -0.44   | 2.04               | 3.28                    |
| <b>4e</b> | -7.45   | 6.47    | 0.15    | 9.88               | -1.10   | 5.05    | 0.20    | 5.17               | 6.52                    |

Below, we give the Cartesian coordinates (in Å), for all compounds, both the  $S_0$  and  $S_1$  as obtained with DFT and TD-DFT.

### 3a (ground state)

|   |            |            |            |
|---|------------|------------|------------|
| C | 1.5379210  | 0.7621670  | 0.0771790  |
| C | -0.3486650 | 2.1216670  | 0.1235240  |
| C | -0.7434950 | 0.7243030  | 0.1308510  |
| C | 0.4440140  | -0.0711210 | 0.1259620  |
| C | -1.8326150 | -0.1174860 | 0.0620860  |
| C | 0.0508310  | -1.4803830 | 0.0696930  |
| O | 0.6848240  | -2.5206660 | 0.0768690  |
| O | -0.9821800 | 3.1672660  | 0.1657240  |
| N | 1.0690230  | 2.0763500  | 0.0834590  |
| N | -1.3600170 | -1.4129660 | 0.0305260  |
| C | 2.9476950  | 0.3954710  | -0.0049450 |
| C | 3.9112770  | 1.1961180  | -0.6470550 |
| C | 3.3510440  | -0.8403360 | 0.5170840  |
| C | 5.2281210  | 0.7845250  | -0.7382920 |
| H | 3.6237300  | 2.1328840  | -1.1116720 |
| C | 4.6745860  | -1.2609310 | 0.4351540  |
| H | 2.6145290  | -1.4914750 | 0.9780170  |
| C | 5.6216430  | -0.4440640 | -0.1894570 |
| H | 5.9751410  | 1.3896160  | -1.2416810 |
| H | 4.9480140  | -2.2229690 | 0.8520350  |
| C | 7.3745580  | -1.9960980 | 0.1949270  |
| H | 8.4414900  | -2.0457690 | -0.0197530 |
| H | 7.2150690  | -2.0496780 | 1.2781400  |
| H | 6.8616660  | -2.8318010 | -0.2948210 |
| C | -3.2516470 | 0.1952660  | 0.0171430  |
| C | -4.2229880 | -0.8523860 | -0.0619200 |
| C | -3.6947950 | 1.5011430  | 0.0520690  |
| C | -5.0828790 | 1.7967490  | 0.0044690  |
| H | -2.9708250 | 2.3104000  | 0.1159340  |
| C | -6.0027940 | 0.7947050  | -0.0732870 |
| C | -6.2810050 | -1.6869450 | -0.1769590 |
| C | -5.3330240 | -2.6799870 | -0.1733410 |
| N | -5.5720550 | -0.5064980 | -0.1048760 |
| N | -4.0708420 | -2.1687730 | -0.1026390 |
| H | -1.9732990 | -2.2246020 | -0.0049960 |
| C | 1.8285080  | 3.2958490  | 0.2905000  |
| H | 2.6987950  | 3.0928880  | 0.9176030  |
| H | 2.1522540  | 3.7388760  | -0.6564300 |
| H | 1.1682830  | 4.0065990  | 0.7910270  |
| O | 6.9325450  | -0.7559130 | -0.3223970 |
| H | -5.4212410 | 2.8256200  | 0.0304300  |
| H | -7.0750210 | 0.9465570  | -0.1124260 |
| H | -7.3588450 | -1.7019070 | -0.2218610 |
| H | -5.5017760 | -3.7468820 | -0.2187140 |

### 3a (excited state)

|   |            |            |            |
|---|------------|------------|------------|
| C | -1.5754450 | 0.8151640  | -0.0384660 |
| C | 0.3428020  | 2.1390410  | -0.0811370 |
| C | 0.7297190  | 0.7458340  | -0.0681030 |
| C | -0.4284860 | -0.0308600 | -0.0609170 |
| C | 1.8688970  | -0.1185830 | -0.0218450 |
| C | -0.0295380 | -1.4509120 | 0.0034040  |
| O | -0.6798520 | -2.4825990 | 0.0344200  |
| O | 0.9655170  | 3.1935380  | -0.1284670 |
| N | -1.0905520 | 2.0989060  | -0.0563220 |
| N | 1.3712530  | -1.3985800 | 0.0128370  |
| C | -2.9595170 | 0.4242950  | 0.0204570  |
| C | -3.9906180 | 1.2551480  | 0.5249860  |
| C | -3.3148270 | -0.8736490 | -0.4047990 |
| C | -5.2974720 | 0.8169120  | 0.5734660  |
| H | -3.7601670 | 2.2351460  | 0.9248440  |
| C | -4.6283850 | -1.3179040 | -0.3607840 |
| H | -2.5432710 | -1.5488670 | -0.7613300 |
| C | -5.6328310 | -0.4706270 | 0.1224010  |
| H | -6.0869440 | 1.4451660  | 0.9734000  |
| H | -4.8546100 | -2.3219320 | -0.7003250 |
| C | -7.3271720 | -2.0969570 | -0.2139960 |
| H | -8.4042050 | -2.1503220 | -0.0599270 |
| H | -7.0989750 | -2.2501630 | -1.2749950 |
| H | -6.8302550 | -2.8677440 | 0.3860490  |
| C | 3.2486450  | 0.1881830  | -0.0114090 |
| C | 4.2285520  | -0.8628970 | 0.0410700  |
| C | 3.7130010  | 1.5123160  | -0.0501890 |
| C | 5.0935850  | 1.7856510  | -0.0358220 |
| H | 2.9933080  | 2.3272700  | -0.0918540 |
| C | 6.0186780  | 0.7741510  | 0.0156810  |
| C | 6.2777570  | -1.7137140 | 0.1052210  |
| C | 5.3271800  | -2.7023480 | 0.1219000  |
| N | 5.5740060  | -0.5272720 | 0.0530760  |
| N | 4.0648170  | -2.1776370 | 0.0821750  |
| H | 1.9784710  | -2.2176290 | 0.0453040  |
| C | -1.8281690 | 3.3349510  | -0.2391910 |
| H | -2.6727340 | 3.1686120  | -0.9112670 |
| H | -2.1853600 | 3.7345950  | 0.7147260  |
| H | -1.1358340 | 4.0565680  | -0.6754250 |
| O | -6.9398810 | -0.8013550 | 0.2050500  |
| H | 5.4427480  | 2.8115030  | -0.0657440 |
| H | 7.0919120  | 0.9179850  | 0.0292110  |
| H | 7.3564060  | -1.7334280 | 0.1245770  |
| H | 5.4884300  | -3.7704880 | 0.1607810  |

#### 4a (ground state)

|   |            |            |            |
|---|------------|------------|------------|
| C | -1.8046050 | 1.0317010  | -0.0823600 |
| C | -0.0158680 | 2.5180130  | -0.1238510 |
| C | 0.4623080  | 1.1493680  | -0.1364480 |
| C | -0.6568320 | 0.2726360  | -0.1336210 |
| C | 1.5994850  | 0.3853100  | -0.0673740 |
| C | -0.1445750 | -1.1063320 | -0.0810730 |
| O | -0.7140250 | -2.1791430 | -0.0952780 |
| O | 0.5649810  | 3.5948140  | -0.1611230 |
| N | -1.4245030 | 2.3804450  | -0.0854420 |
| N | 1.2740210  | -0.9565320 | -0.0370850 |
| C | -3.1847310 | 0.5694470  | -0.0001180 |
| C | -4.2123730 | 1.3110590  | 0.6136140  |
| C | -3.4893580 | -0.7069030 | -0.4931570 |
| C | -5.4953380 | 0.8038190  | 0.7045060  |
| H | -4.0021120 | 2.2774650  | 1.0578860  |
| C | -4.7780050 | -1.2234290 | -0.4107170 |
| H | -2.7010210 | -1.3138350 | -0.9283610 |
| C | -5.7900180 | -0.4646060 | 0.1846490  |
| H | -6.2905170 | 1.3631920  | 1.1865510  |
| H | -4.9733040 | -2.2143440 | -0.8031470 |
| C | -7.4162590 | -2.1549360 | -0.1711100 |
| H | -8.4784120 | -2.2797540 | 0.0366090  |
| H | -7.2423980 | -2.2250250 | -1.2511090 |
| H | -6.8461370 | -2.9355740 | 0.3453640  |
| C | 2.9834580  | 0.8075410  | -0.0143260 |
| C | 3.9324430  | -0.2343260 | 0.0577330  |
| C | 3.4612090  | 2.1004240  | -0.0277910 |
| C | 4.8639750  | 2.3275820  | 0.0359640  |
| H | 2.7611130  | 2.9319550  | -0.0856590 |
| C | 5.7548790  | 1.2943630  | 0.1078540  |
| C | 5.9109880  | -1.2301220 | 0.1787070  |
| C | 4.9188650  | -2.1698130 | 0.1524400  |
| N | 5.2759570  | 0.0041670  | 0.1175720  |
| N | 3.7043920  | -1.5445360 | 0.0779120  |
| B | 2.2238740  | -2.1857590 | 0.0044590  |
| F | 2.1749560  | -2.9355970 | -1.1493300 |
| F | 2.0640270  | -2.9441350 | 1.1407650  |
| C | -2.2633300 | 3.5461610  | -0.2961520 |
| H | -3.1058700 | 3.2904220  | -0.9417370 |
| H | -2.6343730 | 3.9570340  | 0.6478670  |
| H | -1.6447180 | 4.3053260  | -0.7787150 |
| O | -7.0746820 | -0.8710610 | 0.3155430  |
| H | 4.9890490  | -3.2470810 | 0.1815100  |
| H | 6.9842000  | -1.3167340 | 0.2336730  |
| H | 6.8303080  | 1.4086110  | 0.1581550  |
| H | 5.2468000  | 3.3412940  | 0.0278540  |

#### 4a (excited state)

|   |            |            |            |
|---|------------|------------|------------|
| C | -1.8430030 | 1.0801520  | -0.0467970 |
| C | -0.0212570 | 2.5371610  | -0.0819670 |
| C | 0.4506250  | 1.1767860  | -0.0753720 |
| C | -0.6445970 | 0.3176280  | -0.0721300 |
| C | 1.6352790  | 0.3918190  | -0.0313300 |
| C | -0.1232980 | -1.0692680 | -0.0160560 |
| O | -0.7062430 | -2.1340250 | 0.0041660  |
| O | 0.5342350  | 3.6277730  | -0.1212930 |
| N | -1.4524590 | 2.3967510  | -0.0596170 |
| N | 1.2883210  | -0.9326060 | -0.0006530 |
| C | -3.1987140 | 0.5912580  | 0.0123700  |
| C | -4.2808900 | 1.3420500  | 0.5307530  |
| C | -3.4601840 | -0.7236790 | -0.4234820 |
| C | -5.5525000 | 0.8102120  | 0.5851140  |
| H | -4.1178030 | 2.3331670  | 0.9364360  |
| C | -4.7375550 | -1.2626020 | -0.3752340 |
| H | -2.6439790 | -1.3370230 | -0.7921310 |
| C | -5.7963830 | -0.4944050 | 0.1243980  |
| H | -6.3824110 | 1.3758940  | 0.9961420  |
| H | -4.8931050 | -2.2771510 | -0.7227640 |
| C | -7.3697770 | -2.2378930 | -0.2137660 |
| H | -8.4385940 | -2.3701270 | -0.0508850 |
| H | -7.1407820 | -2.3646520 | -1.2779080 |
| H | -6.8127510 | -2.9749620 | 0.3753930  |
| C | 2.9936120  | 0.7970180  | -0.0166510 |
| C | 3.9429800  | -0.2501350 | 0.0308600  |
| C | 3.4944130  | 2.1088590  | -0.0415910 |
| C | 4.8882570  | 2.3115280  | -0.0159590 |
| H | 2.8026800  | 2.9475820  | -0.0796990 |
| C | 5.7836330  | 1.2679240  | 0.0323320  |
| C | 5.9125780  | -1.2632130 | 0.0998550  |
| C | 4.9205410  | -2.2004370 | 0.1009830  |
| N | 5.2843740  | -0.0250720 | 0.0549950  |
| N | 3.7049320  | -1.5612870 | 0.0577510  |
| B | 2.2389030  | -2.1824270 | 0.0323690  |
| F | 2.1127480  | -2.9393040 | -1.1109930 |
| F | 2.0653790  | -2.9188330 | 1.1815030  |
| C | -2.2759740 | 3.5787440  | -0.2321260 |
| H | -3.1077760 | 3.3594900  | -0.9049810 |
| H | -2.6588370 | 3.9450570  | 0.7252020  |
| H | -1.6363490 | 4.3505750  | -0.6631920 |
| O | -7.0737030 | -0.9203290 | 0.2138640  |
| H | 4.9846340  | -3.2776210 | 0.1294020  |
| H | 6.9865780  | -1.3543760 | 0.1262640  |
| H | 6.8601650  | 1.3695000  | 0.0539510  |
| H | 5.2834730  | 3.3211010  | -0.0341150 |

### 3b (ground state)

|   |            |            |            |
|---|------------|------------|------------|
| C | -2.5880010 | 0.8811000  | -0.0651200 |
| C | -1.0478710 | 2.6243750  | -0.0878300 |
| C | -0.3549710 | 1.3495360  | -0.1316290 |
| C | -1.3378150 | 0.3112280  | -0.1399100 |
| C | 0.8938640  | 0.7678400  | -0.0894150 |
| C | -0.6425870 | -0.9771820 | -0.1201570 |
| O | -1.0304760 | -2.1320910 | -0.1491990 |
| O | -0.6614540 | 3.7848510  | -0.1074200 |
| N | -2.4205390 | 2.2659760  | -0.0413360 |
| N | 0.7181960  | -0.6004840 | -0.0868110 |
| C | -3.8810830 | 0.2096290  | 0.0144420  |
| C | -4.9918350 | 0.7614370  | 0.6803620  |
| C | -4.0057300 | -1.0723970 | -0.5361500 |
| C | -6.1837770 | 0.0658400  | 0.7674040  |
| H | -4.9146960 | 1.7277160  | 1.1665820  |
| C | -5.2021460 | -1.7781260 | -0.4584180 |
| H | -3.1477690 | -1.5330280 | -1.0163970 |
| C | -6.3004950 | -1.2064660 | 0.1904610  |
| H | -7.0413230 | 0.4785660  | 1.2888000  |
| H | -5.2594560 | -2.7670610 | -0.8975120 |
| C | -7.6692110 | -3.0997570 | -0.2234480 |
| H | -8.6963670 | -3.3900000 | -0.0051820 |
| H | -7.5124570 | -3.0919510 | -1.3083750 |
| H | -6.9788680 | -3.8116760 | 0.2434580  |
| C | 2.2111020  | 1.3800820  | -0.0452790 |
| C | 3.3862650  | 0.5657810  | 0.0021210  |
| C | 2.3604440  | 2.7524880  | -0.0509390 |
| C | 3.6507970  | 3.3403100  | -0.0052210 |
| H | 1.4770180  | 3.3859650  | -0.0902800 |
| C | 4.7662050  | 2.5569620  | 0.0426390  |
| C | 5.5754040  | 0.1923530  | 0.0847360  |
| C | 4.8735550  | -0.9915800 | 0.0630650  |
| N | 4.6273770  | 1.1952620  | 0.0454080  |
| N | 3.5262400  | -0.7509270 | 0.0118760  |
| H | 1.4976360  | -1.2550700 | -0.0746650 |
| C | -3.4325560 | 3.2921360  | -0.2125700 |
| H | -4.2425230 | 2.9182220  | -0.8419260 |
| H | -3.8372580 | 3.6282740  | 0.7471470  |
| H | -2.9502060 | 4.1438320  | -0.6958430 |
| O | -7.5082940 | -1.8045730 | 0.3219480  |
| H | 3.7594480  | 4.4181900  | -0.0083530 |
| H | 5.7808590  | 2.9360840  | 0.0786060  |
| H | 6.6304130  | 0.4157440  | 0.1232980  |
| C | 5.4071870  | -2.4016510 | 0.0890790  |
| C | 4.8490330  | -3.1202400 | 1.3273490  |
| C | 4.9412480  | -3.1321410 | -1.1799310 |
| C | 6.9371330  | -2.3900520 | 0.1452470  |
| H | 5.1722690  | -2.6209760 | 2.2474900  |
| H | 3.7552930  | -3.1290140 | 1.3093140  |
| H | 5.2055160  | -4.1563830 | 1.3529370  |
| H | 5.3312240  | -2.6415000 | -2.0785960 |
| H | 5.2984580  | -4.1682970 | -1.1694290 |
| H | 3.8491120  | -3.1414740 | -1.2419140 |
| H | 7.3176240  | -3.4168270 | 0.1633460  |
| H | 7.3647260  | -1.8898340 | -0.7316220 |
| H | 7.2992360  | -1.8828150 | 1.0471990  |

### 3b (excited state)

|   |            |            |            |
|---|------------|------------|------------|
| C | -2.6351990 | 0.9196190  | -0.0314270 |
| C | -1.0598420 | 2.6374070  | -0.0560090 |
| C | -0.3728600 | 1.3647850  | -0.0709490 |
| C | -1.3290860 | 0.3499530  | -0.0746420 |
| C | 0.9310350  | 0.7756400  | -0.0445010 |
| C | -0.6239700 | -0.9464450 | -0.0384090 |
| O | -1.0270090 | -2.0982980 | -0.0249140 |
| O | -0.6858530 | 3.8042220  | -0.0858860 |
| N | -2.4474710 | 2.2798460  | -0.0266210 |
| N | 0.7296860  | -0.5834950 | -0.0323820 |
| C | -3.8972170 | 0.2306150  | 0.0268140  |
| C | -5.0832800 | 0.8043370  | 0.5489490  |
| C | -3.9592800 | -1.1077360 | -0.4174770 |
| C | -6.2601010 | 0.0865730  | 0.5956680  |
| H | -5.0728610 | 1.8049210  | 0.9637730  |
| C | -5.1414120 | -1.8326440 | -0.3751270 |
| H | -3.0597960 | -1.5899540 | -0.7874220 |
| C | -6.3051530 | -1.2363920 | 0.1252930  |
| H | -7.1660360 | 0.5182380  | 1.0090280  |
| H | -5.1420660 | -2.8568190 | -0.7296220 |
| C | -7.5989670 | -3.1928590 | -0.2307600 |
| H | -8.6362210 | -3.4863450 | -0.0739340 |
| H | -7.3497580 | -3.2759720 | -1.2948700 |
| H | -6.9392900 | -3.8430290 | 0.3551420  |
| C | 2.2086250  | 1.3785590  | -0.0329040 |
| C | 3.3953770  | 0.5672720  | -0.0032890 |
| C | 2.3710520  | 2.7737660  | -0.0485660 |
| C | 3.6571100  | 3.3425870  | -0.0336390 |
| H | 1.4892800  | 3.4108260  | -0.0726810 |
| C | 4.7815110  | 2.5552390  | -0.0036940 |
| C | 5.5800640  | 0.1832340  | 0.0387070  |
| C | 4.8779940  | -0.9987430 | 0.0399970  |
| N | 4.6330190  | 1.1900580  | 0.0108500  |
| N | 3.5271510  | -0.7499840 | 0.0136640  |
| H | 1.5052170  | -1.2457920 | -0.0176860 |
| C | -3.4421940 | 3.3241430  | -0.1855450 |
| H | -4.2331670 | 2.9858680  | -0.8582690 |
| H | -3.8730510 | 3.6188040  | 0.7761180  |
| H | -2.9301910 | 4.1886320  | -0.6108740 |
| O | -7.5059630 | -1.8501470 | 0.2076080  |
| H | 3.7738230  | 4.4202360  | -0.0455840 |
| H | 5.7973880  | 2.9304970  | 0.0091440  |
| H | 6.6359990  | 0.4055880  | 0.0546280  |
| C | 5.4049780  | -2.4108830 | 0.0656760  |
| C | 4.8689890  | -3.1198100 | 1.3193220  |
| C | 4.9123400  | -3.1495230 | -1.1885980 |
| C | 6.9357660  | -2.4056810 | 0.0920060  |
| H | 5.2127070  | -2.6158780 | 2.2294000  |
| H | 3.7749670  | -3.1232870 | 1.3234280  |
| H | 5.2207810  | -4.1577560 | 1.3447160  |
| H | 5.2874980  | -2.6671850 | -2.0979670 |
| H | 5.2643920  | -4.1876320 | -1.1771620 |
| H | 3.8190970  | -3.1536120 | -1.2302240 |
| H | 7.3128440  | -3.4338560 | 0.1100480  |
| H | 7.3476940  | -1.9128320 | -0.7964170 |
| H | 7.3169580  | -1.8929240 | 0.9828600  |



#### 4b (ground state)

|   |            |            |            |
|---|------------|------------|------------|
| C | -2.7502120 | 1.0362730  | -0.0505850 |
| C | -1.2963980 | 2.8525470  | -0.0707400 |
| C | -0.5553510 | 1.6100310  | -0.1553170 |
| C | -1.4768610 | 0.5263540  | -0.1632770 |
| C | 0.7113130  | 1.0833670  | -0.1366560 |
| C | -0.7001660 | -0.7235810 | -0.1826750 |
| O | -1.0473960 | -1.8850990 | -0.2555340 |
| O | -0.9455610 | 4.0255500  | -0.0771420 |
| N | -2.6472870 | 2.4329710  | -0.0035230 |
| N | 0.6616760  | -0.2927310 | -0.1390070 |
| C | -4.0081330 | 0.3050410  | 0.0458980  |
| C | -5.1360000 | 0.7996400  | 0.7281970  |
| C | -4.0764140 | -0.9810130 | -0.5069770 |
| C | -6.2909580 | 0.0460250  | 0.8282450  |
| H | -5.1007990 | 1.7668800  | 1.2170900  |
| C | -5.2355640 | -1.7445660 | -0.4156460 |
| H | -3.2021470 | -1.3984280 | -0.9976540 |
| C | -6.3523220 | -1.2291160 | 0.2486830  |
| H | -7.1609060 | 0.4144260  | 1.3621790  |
| H | -5.2491680 | -2.7344650 | -0.8561200 |
| C | -7.6308550 | -3.1863980 | -0.1546640 |
| H | -8.6397240 | -3.5276910 | 0.0748230  |
| H | -7.4877550 | -3.1675960 | -1.2413090 |
| H | -6.9005370 | -3.8646680 | 0.3012710  |
| C | 1.9903780  | 1.7537150  | -0.0825200 |
| C | 3.1266210  | 0.9172750  | -0.0055580 |
| C | 2.1893570  | 3.1186980  | -0.0735860 |
| C | 3.5081570  | 3.6351590  | 0.0140120  |
| H | 1.3288390  | 3.7837370  | -0.1238770 |
| C | 4.5870210  | 2.8012560  | 0.0979690  |
| C | 5.2646690  | 0.3799450  | 0.1719890  |
| C | 4.5240930  | -0.7736800 | 0.1252000  |
| N | 4.3814930  | 1.4435910  | 0.0901730  |
| N | 3.1864360  | -0.4187790 | 0.0089530  |
| B | 1.8430540  | -1.2800630 | -0.3074660 |
| F | 1.9479370  | -1.7078490 | -1.6182930 |
| F | 1.7725350  | -2.3187450 | 0.5905900  |
| C | -3.7088120 | 3.4126670  | -0.1448500 |
| H | -4.5056390 | 3.0141530  | -0.7759990 |
| H | -4.1211890 | 3.7092920  | 0.8245460  |
| H | -3.2718520 | 4.2962890  | -0.6141690 |
| O | -7.5275470 | -1.8863500 | 0.3933920  |
| H | 6.3267120  | 0.5410900  | 0.2593940  |
| H | 5.6165170  | 3.1282100  | 0.1742010  |
| H | 3.6734150  | 4.7059390  | 0.0215690  |
| C | 5.0595070  | -2.1828360 | 0.2590020  |
| C | 4.6750900  | -2.7352310 | 1.6444820  |
| C | 4.5205840  | -3.1043020 | -0.8462100 |
| C | 6.5912150  | -2.1363180 | 0.1563110  |
| H | 5.0985950  | -2.1130490 | 2.4411540  |
| H | 3.5913950  | -2.7798560 | 1.7657490  |
| H | 5.0784130  | -3.7486010 | 1.7506980  |
| H | 4.7014610  | -2.6804160 | -1.8394740 |
| H | 5.0400430  | -4.0667220 | -0.7810580 |
| H | 3.4512490  | -3.2874810 | -0.7425420 |
| H | 6.9863470  | -3.1521370 | 0.2518650  |
| H | 6.9190410  | -1.7370160 | -0.8102890 |
| H | 7.0362290  | -1.5361340 | 0.9583660  |

#### 4b (excited state)

|   |            |            |            |
|---|------------|------------|------------|
| C | -2.7994960 | 1.0740010  | -0.0124940 |
| C | -1.3102140 | 2.8693870  | -0.0294870 |
| C | -0.5738210 | 1.6328700  | -0.0814280 |
| C | -1.4725420 | 0.5707330  | -0.0887810 |
| C | 0.7455000  | 1.0992260  | -0.0844490 |
| C | -0.6827410 | -0.6847120 | -0.0938520 |
| O | -1.0422860 | -1.8438740 | -0.1250800 |
| O | -0.9871620 | 4.0507730  | -0.0410350 |
| N | -2.6822590 | 2.4422320  | 0.0142230  |
| N | 0.6727800  | -0.2648360 | -0.0785810 |
| C | -4.0277280 | 0.3213750  | 0.0559540  |
| C | -5.2232050 | 0.8230880  | 0.6242160  |
| C | -4.0346430 | -1.0039250 | -0.4248640 |
| C | -6.3621690 | 0.0469870  | 0.6825930  |
| H | -5.2489780 | 1.8124820  | 1.0647410  |
| C | -5.1781050 | -1.7878210 | -0.3724970 |
| H | -3.1228540 | -1.4290200 | -0.8327660 |
| C | -6.3546860 | -1.2634580 | 0.1764180  |
| H | -7.2765730 | 0.4216460  | 1.1311760  |
| H | -5.1385940 | -2.8005620 | -0.7560930 |
| C | -7.5597570 | -3.2723460 | -0.1999010 |
| H | -8.5762330 | -3.6208860 | -0.0217710 |
| H | -7.3387190 | -3.3139340 | -1.2724720 |
| H | -6.8518630 | -3.9037760 | 0.3486840  |
| C | 1.9976010  | 1.7549130  | -0.0789500 |
| C | 3.1399250  | 0.9181870  | -0.0263390 |
| C | 2.2119860  | 3.1439050  | -0.0868390 |
| C | 3.5274350  | 3.6383670  | -0.0422550 |
| H | 1.3566210  | 3.8154560  | -0.1186040 |
| C | 4.6161060  | 2.7996090  | 0.0172650  |
| C | 5.2754610  | 0.3668880  | 0.0966220  |
| C | 4.5356910  | -0.7851430 | 0.0849170  |
| N | 4.3946970  | 1.4340150  | 0.0281130  |
| N | 3.1921290  | -0.4204950 | 0.0018630  |
| B | 1.8580630  | -1.2727600 | -0.2497900 |
| F | 1.8825740  | -1.7391170 | -1.5510600 |
| F | 1.7777220  | -2.2848650 | 0.6789500  |
| C | -3.7306860 | 3.4379220  | -0.1060100 |
| H | -4.5185230 | 3.0725560  | -0.7681940 |
| H | -4.1546790 | 3.6951680  | 0.8693410  |
| H | -3.2707200 | 4.3336580  | -0.5264760 |
| O | -7.5198430 | -1.9381670 | 0.2735840  |
| H | 6.3400120  | 0.5262860  | 0.1524770  |
| H | 5.6489760  | 3.1180800  | 0.0594550  |
| H | 3.7026920  | 4.7082990  | -0.0489960 |
| C | 5.0645600  | -2.1958200 | 0.2240420  |
| C | 4.7267050  | -2.7260280 | 1.6301990  |
| C | 4.4822110  | -3.1330540 | -0.8454100 |
| C | 6.5919010  | -2.1623250 | 0.0667180  |
| H | 5.1838800  | -2.0956590 | 2.4012480  |
| H | 3.6476980  | -2.7578600 | 1.7920570  |
| H | 5.1238250  | -3.7419730 | 1.7377770  |
| H | 4.6273870  | -2.7255540 | -1.8513050 |
| H | 4.9989300  | -4.0974430 | -0.7847010 |
| H | 3.4165540  | -3.3107090 | -0.6994690 |
| H | 6.9847570  | -3.1788180 | 0.1668120  |
| H | 6.8868930  | -1.7811990 | -0.9175140 |
| H | 7.0676950  | -1.5498230 | 0.8411420  |

**3c (ground state)**

|   |            |            |            |
|---|------------|------------|------------|
| C | -2.9516880 | 0.8176220  | -0.0625540 |
| C | -1.6102610 | 2.7177400  | -0.0644130 |
| C | -0.7830010 | 1.5261220  | -0.1285980 |
| C | -1.6472850 | 0.3876780  | -0.1497240 |
| C | 0.5215420  | 1.0832550  | -0.0961000 |
| C | -0.8166680 | -0.8179120 | -0.1493070 |
| O | -1.0765130 | -2.0076370 | -0.1933860 |
| O | -1.3516770 | 3.9131940  | -0.0688910 |
| N | -2.9354690 | 2.2119850  | -0.0193940 |
| N | 0.4953670  | -0.2959390 | -0.1131420 |
| C | -4.1636890 | 0.0090500  | 0.0128840  |
| C | -5.3239270 | 0.4290510  | 0.6906130  |
| C | -4.1515650 | -1.2721380 | -0.5536850 |
| C | -6.4327590 | -0.3926840 | 0.7738660  |
| H | -5.3491080 | 1.3919920  | 1.1887890  |
| C | -5.2639810 | -2.1042380 | -0.4800710 |
| H | -3.2514760 | -1.6307800 | -1.0436860 |
| C | -6.4140970 | -1.6630500 | 0.1809810  |
| H | -7.3270980 | -0.0821230 | 1.3042470  |
| H | -5.2166300 | -3.0879700 | -0.9318700 |
| C | -7.5724150 | -3.6879980 | -0.2520560 |
| H | -8.5610060 | -4.0901190 | -0.0332330 |
| H | -7.4236960 | -3.6494440 | -1.3374290 |
| H | -6.8066260 | -4.3270430 | 0.2023790  |
| C | 1.7637670  | 1.8354750  | -0.0430320 |
| C | 3.0213880  | 1.1553780  | -0.0001100 |
| C | 1.7615710  | 3.2160040  | -0.0348250 |
| C | 2.9793370  | 3.9417400  | 0.0195070  |
| H | 0.8139570  | 3.7489180  | -0.0696700 |
| C | 4.1749000  | 3.2872560  | 0.0599170  |
| C | 5.2380400  | 1.0297050  | 0.0783500  |
| C | 4.6704600  | -0.2277660 | 0.0455710  |
| N | 4.1867740  | 1.9175330  | 0.0477200  |
| N | 3.3051830  | -0.1371650 | -0.0006130 |
| H | 1.3401550  | -0.8626200 | -0.1154770 |
| C | -4.0536090 | 3.1246330  | -0.1740190 |
| H | -4.8223480 | 2.6714620  | -0.8029020 |
| H | -4.4858610 | 3.4049210  | 0.7915610  |
| H | -3.6695180 | 4.0284340  | -0.6506670 |
| O | -7.5490500 | -2.3899400 | 0.3097430  |
| H | 2.9680730  | 5.0250090  | 0.0281030  |
| H | 5.1415350  | 3.7753200  | 0.1006870  |
| H | 6.2598360  | 1.3716810  | 0.1338930  |
| C | 5.3556380  | -1.5295040 | 0.0612460  |
| C | 6.7469050  | -1.6139670 | -0.0722320 |
| C | 4.6157390  | -2.7071340 | 0.2127610  |
| C | 7.3861130  | -2.8491750 | -0.0475290 |
| H | 7.3357260  | -0.7102460 | -0.2066540 |
| C | 5.2563560  | -3.9429310 | 0.2354280  |
| H | 3.5373570  | -2.6429760 | 0.3156650  |
| C | 6.6423970  | -4.0192220 | 0.1070090  |
| H | 8.4657810  | -2.8991850 | -0.1541490 |
| H | 4.6698470  | -4.8491240 | 0.3548250  |
| H | 7.1407800  | -4.9838840 | 0.1245960  |

### 3c (excited state)

|   |            |            |            |
|---|------------|------------|------------|
| C | 3.0021080  | -0.8514650 | -0.0285440 |
| C | 1.6241150  | -2.7316400 | -0.0370930 |
| C | 0.8021940  | -1.5423440 | -0.0664780 |
| C | 1.6416560  | -0.4289910 | -0.0796410 |
| C | -0.5581430 | -1.0987870 | -0.0463760 |
| C | 0.7989730  | 0.7831600  | -0.0570240 |
| O | 1.0734750  | 1.9717380  | -0.0550950 |
| O | 1.3813830  | -3.9324590 | -0.0545260 |
| N | 2.9650020  | -2.2231840 | -0.0100700 |
| N | -0.5068030 | 0.2741970  | -0.0476860 |
| C | 4.1805220  | -0.0269060 | 0.0251180  |
| C | 5.4198310  | -0.4608800 | 0.5580190  |
| C | 4.0965920  | 1.3047280  | -0.4347950 |
| C | 6.5098900  | 0.3828880  | 0.6012140  |
| H | 5.5174610  | -1.4520480 | 0.9838990  |
| C | 5.1911430  | 2.1562570  | -0.3964420 |
| H | 3.1515210  | 1.6802470  | -0.8144990 |
| C | 6.4108750  | 1.6976510  | 0.1159330  |
| H | 7.4558660  | 0.0585520  | 1.0228780  |
| H | 5.0807210  | 3.1701460  | -0.7630170 |
| C | 7.4832010  | 3.7810700  | -0.2569340 |
| H | 8.4807400  | 4.1885650  | -0.0974740 |
| H | 7.2337850  | 3.8244060  | -1.3233060 |
| H | 6.7518900  | 4.3607070  | 0.3177510  |
| C | -1.7617970 | -1.8372960 | -0.0291520 |
| C | -3.0302380 | -1.1604700 | -0.0048420 |
| C | -1.7702240 | -3.2427120 | -0.0345880 |
| C | -2.9854450 | -3.9480680 | -0.0161300 |
| H | -0.8239980 | -3.7792650 | -0.0537830 |
| C | -4.1910020 | -3.2901500 | 0.0059610  |
| C | -5.2436270 | -1.0244660 | 0.0294290  |
| C | -4.6756880 | 0.2320660  | 0.0245710  |
| N | -4.1942730 | -1.9162480 | 0.0098750  |
| N | -3.3054430 | 0.1327480  | 0.0048140  |
| H | -1.3494830 | 0.8477700  | -0.0428490 |
| C | 4.0689330  | -3.1539090 | -0.1542090 |
| H | 4.8212810  | -2.7380210 | -0.8276830 |
| H | 4.5245430  | -3.3895790 | 0.8122600  |
| H | 3.6566720  | -4.0736000 | -0.5719780 |
| O | 7.5355890  | 2.4408400  | 0.1964730  |
| H | -2.9832050 | -5.0320840 | -0.0197420 |
| H | -5.1591710 | -3.7750130 | 0.0200350  |
| H | -6.2668920 | -1.3658960 | 0.0549100  |
| C | -5.3526880 | 1.5355870  | 0.0414970  |
| C | -6.7470060 | 1.6275130  | -0.0619150 |
| C | -4.6055710 | 2.7130220  | 0.1637330  |
| C | -7.3793040 | 2.8659320  | -0.0383110 |
| H | -7.3437570 | 0.7253670  | -0.1688590 |
| C | -5.2395430 | 3.9521150  | 0.1858090  |
| H | -3.5255590 | 2.6454950  | 0.2440580  |
| C | -6.6276460 | 4.0348470  | 0.0860680  |
| H | -8.4610010 | 2.9195260  | -0.1208020 |
| H | -4.6459770 | 4.8566000  | 0.2823150  |
| H | -7.1210590 | 5.0020830  | 0.1032870  |

**4c (ground state)**

|   |            |            |            |
|---|------------|------------|------------|
| C | -3.0926010 | 0.9295220  | -0.0876140 |
| C | -1.8422070 | 2.8913920  | -0.0882320 |
| C | -0.9690580 | 1.7348160  | -0.0883390 |
| C | -1.7672060 | 0.5578980  | -0.1124280 |
| C | 0.3456660  | 1.3507460  | -0.0075750 |
| C | -0.8607040 | -0.5999710 | -0.0545890 |
| O | -1.0775210 | -1.7949640 | -0.0603640 |
| O | -1.6190450 | 4.0948720  | -0.1136430 |
| N | -3.1423120 | 2.3295860  | -0.0809450 |
| N | 0.4454940  | -0.0234430 | -0.0067390 |
| C | -4.2681200 | 0.0680250  | -0.0388880 |
| C | -5.4842140 | 0.4552620  | 0.5556710  |
| C | -4.1611050 | -1.2345200 | -0.5450030 |
| C | -6.5543400 | -0.4183780 | 0.6149030  |
| H | -5.5859330 | 1.4345950  | 1.0096880  |
| C | -5.2334890 | -2.1187810 | -0.4944660 |
| H | -3.2172230 | -1.5684360 | -0.9653790 |
| C | -6.4397970 | -1.7098950 | 0.0817440  |
| H | -7.4911610 | -0.1323050 | 1.0819610  |
| H | -5.1107800 | -3.1176170 | -0.8961230 |
| C | -7.4687310 | -3.8097850 | -0.3189300 |
| H | -8.4471040 | -4.2532220 | -0.1369320 |
| H | -7.2588820 | -3.8118220 | -1.3948490 |
| H | -6.6997030 | -4.3866640 | 0.2074470  |
| C | 1.5403670  | 2.1632300  | 0.0511010  |
| C | 2.7634010  | 1.4587390  | 0.0866910  |
| C | 1.5915730  | 3.5416650  | 0.0315240  |
| C | 2.8513080  | 4.1958700  | 0.0439840  |
| H | 0.6643990  | 4.1109340  | -0.0062850 |
| C | 4.0187600  | 3.4858080  | 0.0504670  |
| C | 4.9540080  | 1.1480850  | 0.0413170  |
| C | 4.3275480  | -0.0746320 | 0.0556370  |
| N | 3.9624240  | 2.1127470  | 0.0598750  |
| N | 2.9617500  | 0.1386580  | 0.0978810  |
| B | 1.7130130  | -0.8940720 | 0.1859070  |
| F | 1.8846330  | -1.8270060 | -0.8032550 |
| F | 1.7314950  | -1.4442720 | 1.4582480  |
| C | -4.2924690 | 3.1853360  | -0.3074870 |
| H | -5.0044930 | 2.6894030  | -0.9701890 |
| H | -4.7891070 | 3.4569080  | 0.6291820  |
| H | -3.9257590 | 4.1003910  | -0.7766180 |
| O | -7.5431230 | -2.4885370 | 0.1811990  |
| H | 6.0013810  | 1.4054820  | 0.0477270  |
| H | 5.0088450  | 3.9239560  | 0.0421770  |
| H | 2.9004670  | 5.2782470  | 0.0344470  |
| C | 4.9942910  | -1.3861670 | 0.0020790  |
| C | 6.1787280  | -1.4979730 | -0.7391000 |
| C | 4.5043660  | -2.5011480 | 0.6904110  |
| C | 6.8707680  | -2.7034040 | -0.7842070 |
| H | 6.5420100  | -0.6448720 | -1.3063250 |
| C | 5.2000990  | -3.7058930 | 0.6373550  |
| H | 3.5876080  | -2.4284660 | 1.2641010  |
| C | 6.3817830  | -3.8116050 | -0.0937270 |
| H | 7.7822830  | -2.7805950 | -1.3692200 |
| H | 4.8109890  | -4.5671220 | 1.1715630  |
| H | 6.9162070  | -4.7561880 | -0.1326650 |

#### 4c (excited state)

|   |            |            |            |
|---|------------|------------|------------|
| C | -3.1443800 | 0.9626500  | -0.0580040 |
| C | -1.8601030 | 2.9098830  | -0.0537090 |
| C | -0.9918870 | 1.7608040  | -0.0374410 |
| C | -1.7687420 | 0.6067470  | -0.0577760 |
| C | 0.3766960  | 1.3758750  | 0.0279060  |
| C | -0.8484980 | -0.5536120 | 0.0119930  |
| O | -1.0778890 | -1.7451040 | 0.0426730  |
| O | -1.6673310 | 4.1188320  | -0.0794010 |
| N | -3.1782780 | 2.3355390  | -0.0611870 |
| N | 0.4531640  | 0.0117940  | 0.0375070  |
| C | -4.2839250 | 0.0793860  | -0.0298430 |
| C | -5.5561410 | 0.4558900  | 0.4637630  |
| C | -4.1179500 | -1.2490130 | -0.4721320 |
| C | -6.6025700 | -0.4424810 | 0.4884610  |
| H | -5.7157050 | 1.4457230  | 0.8738600  |
| C | -5.1675870 | -2.1558240 | -0.4536850 |
| H | -3.1447240 | -1.5782780 | -0.8220830 |
| C | -6.4222940 | -1.7552480 | 0.0216730  |
| H | -7.5751640 | -0.1633740 | 0.8807050  |
| H | -4.9951250 | -3.1662200 | -0.8053230 |
| C | -7.3736640 | -3.8964960 | -0.3518890 |
| H | -8.3524570 | -4.3534260 | -0.2119950 |
| H | -7.0949250 | -3.9395920 | -1.4108530 |
| H | -6.6284140 | -4.4293630 | 0.2492250  |
| C | 1.5476210  | 2.1695990  | 0.0541060  |
| C | 2.7742960  | 1.4635800  | 0.0725310  |
| C | 1.6109110  | 3.5733920  | 0.0134820  |
| C | 2.8671620  | 4.2035880  | -0.0164960 |
| H | 0.6886660  | 4.1499220  | -0.0067690 |
| C | 4.0427400  | 3.4878050  | -0.0248230 |
| C | 4.9584430  | 1.1368420  | -0.0187390 |
| C | 4.3348290  | -0.0842840 | 0.0287400  |
| N | 3.9723040  | 2.1059760  | 0.0085470  |
| N | 2.9656850  | 0.1404450  | 0.0990350  |
| B | 1.7330560  | -0.8724880 | 0.2184270  |
| F | 1.8465690  | -1.8197250 | -0.7662110 |
| F | 1.7330950  | -1.4144690 | 1.4939150  |
| C | -4.3224230 | 3.2081730  | -0.2469530 |
| H | -5.0326780 | 2.7507700  | -0.9391070 |
| H | -4.8184240 | 3.4284890  | 0.7031250  |
| H | -3.9432340 | 4.1439910  | -0.6606100 |
| O | -7.5078400 | -2.5547710 | 0.0816610  |
| H | 6.0062460  | 1.3920340  | -0.0408750 |
| H | 5.0349460  | 3.9167510  | -0.0613260 |
| H | 2.9268350  | 5.2858100  | -0.0447720 |
| C | 4.9912780  | -1.3994040 | -0.0159090 |
| C | 6.1694650  | -1.5303270 | -0.7651540 |
| C | 4.5015130  | -2.5050950 | 0.6887900  |
| C | 6.8538810  | -2.7403380 | -0.8003750 |
| H | 6.5336810  | -0.6864840 | -1.3453640 |
| C | 5.1877740  | -3.7155110 | 0.6436420  |
| H | 3.5925840  | -2.4201090 | 1.2731260  |
| C | 6.3635330  | -3.8383640 | -0.0944940 |
| H | 7.7609910  | -2.8294270 | -1.3907550 |
| H | 4.7973840  | -4.5675180 | 1.1918420  |
| H | 6.8917320  | -4.7867370 | -0.1262690 |

### 3e (ground state)

|   |            |            |            |
|---|------------|------------|------------|
| C | 3.0553020  | 0.7563010  | 0.0563090  |
| C | 1.2137090  | 2.1759420  | 0.0666560  |
| C | 0.7742280  | 0.7943740  | 0.1315850  |
| C | 1.9356360  | -0.0383050 | 0.1463890  |
| C | -0.3431070 | -0.0149090 | 0.1058440  |
| C | 1.4973530  | -1.4347990 | 0.1482170  |
| O | 2.0966630  | -2.4945950 | 0.1890640  |
| O | 0.6141560  | 3.2436480  | 0.0730210  |
| N | 2.6279910  | 2.0840470  | 0.0165990  |
| N | 0.0888210  | -1.3234930 | 0.1201210  |
| C | 4.4515080  | 0.3407780  | -0.0243420 |
| C | 5.4336670  | 1.0828300  | -0.7074460 |
| C | 4.8196930  | -0.8864630 | 0.5419710  |
| C | 6.7348280  | 0.6235470  | -0.7963920 |
| H | 5.1720890  | 2.0100210  | -1.2054840 |
| C | 6.1273060  | -1.3545860 | 0.4626220  |
| H | 4.0674750  | -1.4936060 | 1.0363040  |
| C | 7.0935470  | -0.5954820 | -0.2040660 |
| H | 7.4956020  | 1.1828960  | -1.3311480 |
| H | 6.3733710  | -2.3082790 | 0.9142670  |
| C | 8.7976560  | -2.1905450 | 0.2213290  |
| H | 9.8595130  | -2.2850470 | -0.0031860 |
| H | 8.6499880  | -2.1967630 | 1.3075200  |
| H | 8.2506440  | -3.0264070 | -0.2297150 |
| C | -1.7495330 | 0.3555500  | 0.0631880  |
| C | -2.7827290 | -0.6556740 | 0.0292010  |
| C | -2.1238640 | 1.6667090  | 0.0493320  |
| C | -3.5050610 | 2.0510740  | 0.0223280  |
| H | -1.3655990 | 2.4482830  | 0.0699460  |
| C | -4.5239990 | 1.0695220  | 0.0021090  |
| C | -4.8592200 | -1.4612090 | -0.0859140 |
| C | -3.8859430 | -2.4845160 | -0.0401940 |
| N | -4.1260860 | -0.2705630 | -0.0268870 |
| N | -2.6183840 | -1.9566000 | 0.0287290  |
| C | -6.2205300 | -1.7765320 | -0.1982080 |
| C | -6.5667470 | -3.1200680 | -0.2375030 |
| H | -7.0029690 | -1.0354360 | -0.2718310 |
| H | -7.6157640 | -3.3849340 | -0.3254480 |
| C | -4.2541130 | -3.8346530 | -0.0790700 |
| C | -5.5998420 | -4.1405720 | -0.1733940 |
| H | -3.4883060 | -4.6025670 | -0.0401310 |
| H | -5.9179420 | -5.1778860 | -0.2066690 |
| C | -3.8649180 | 3.4125020  | 0.0376230  |
| C | -5.1908880 | 3.7994500  | 0.0440470  |
| H | -3.0680420 | 4.1512790  | 0.0494630  |
| H | -5.4569760 | 4.8511960  | 0.0560370  |
| C | -5.8664930 | 1.4683810  | 0.0286450  |
| C | -6.1892660 | 2.8170050  | 0.0468690  |
| H | -6.6611800 | 0.7398850  | 0.0525690  |
| H | -7.2355000 | 3.1062370  | 0.0687640  |
| H | -0.5522160 | -2.1134610 | 0.1190160  |
| C | 3.4284460  | 3.2855490  | 0.1668790  |
| H | 4.2995210  | 3.0787920  | 0.7915960  |
| H | 3.7543770  | 3.6802290  | -0.8004760 |
| H | 2.7978020  | 4.0364020  | 0.6464760  |
| O | 8.3914270  | -0.9567750 | -0.3390190 |

### 3e (excited state)

|   |            |            |            |
|---|------------|------------|------------|
| C | -1.2210080 | 2.1934900  | -0.0061260 |
| C | -0.7869230 | 0.8144450  | -0.0598290 |
| C | -1.9192140 | 0.0003560  | -0.0837620 |
| C | 0.3815330  | -0.0176750 | -0.0559840 |
| C | -1.4753450 | -1.4069080 | -0.0865430 |
| O | -2.0892170 | -2.4589350 | -0.1029060 |
| O | -0.6381800 | 3.2718150  | -0.0073730 |
| N | -2.6516970 | 2.1024590  | 0.0238600  |
| N | -0.0746760 | -1.3100530 | -0.0785150 |
| C | -4.4616550 | 0.3631280  | 0.0371630  |
| C | -5.5079290 | 1.1303670  | 0.6045140  |
| C | -4.7821030 | -0.9178910 | -0.4574910 |
| C | -6.7996400 | 0.6483190  | 0.6484630  |
| H | -5.2999930 | 2.0929170  | 1.0561280  |
| C | -6.0801660 | -1.4063580 | -0.4195140 |
| H | -3.9960130 | -1.5451180 | -0.8657170 |
| C | -7.1018310 | -0.6212360 | 0.1285070  |
| H | -7.6013130 | 1.2266330  | 1.0963920  |
| H | -6.2810460 | -2.3955890 | -0.8138430 |
| C | -8.7497780 | -2.2795120 | -0.2764560 |
| H | -9.8216770 | -2.3760680 | -0.1085870 |
| H | -8.5359280 | -2.3626530 | -1.3481220 |
| H | -8.2186240 | -3.0675940 | 0.2692230  |
| C | 1.7446920  | 0.3469570  | -0.0341320 |
| C | 2.7797060  | -0.6611020 | -0.0268170 |
| C | 2.1341950  | 1.6854510  | -0.0036220 |
| C | 3.4995160  | 2.0533800  | -0.0127490 |
| H | 1.3755650  | 2.4663500  | 0.0060090  |
| C | 4.5248720  | 1.0629790  | -0.0373410 |
| C | 4.8546200  | -1.4689640 | 0.0699790  |
| C | 3.8823840  | -2.4942230 | 0.0312470  |
| N | 4.1209680  | -0.2788060 | 0.0118160  |
| N | 2.6129830  | -1.9636770 | -0.0261790 |
| C | 6.2145160  | -1.7810660 | 0.1904970  |
| C | 6.5640950  | -3.1255350 | 0.2334520  |
| H | 6.9920660  | -1.0358130 | 0.2753840  |
| H | 7.6132580  | -3.3878370 | 0.3279750  |
| C | 4.2522500  | -3.8419570 | 0.0723690  |
| C | 5.6004370  | -4.1465570 | 0.1671910  |
| H | 3.4883010  | -4.6120810 | 0.0377690  |
| H | 5.9193650  | -5.1836220 | 0.2025250  |
| C | 3.8839960  | 3.4180470  | -0.0297600 |
| C | 5.2108380  | 3.7878320  | -0.0927900 |
| H | 3.0969070  | 4.1670020  | -0.0017680 |
| H | 5.4858840  | 4.8377500  | -0.1067660 |
| C | 5.8628990  | 1.4500670  | -0.1326840 |
| C | 6.2030020  | 2.7981820  | -0.1566540 |
| H | 6.6461630  | 0.7123860  | -0.2133220 |
| H | 7.2491230  | 3.0777870  | -0.2321360 |
| H | 0.5623240  | -2.1066430 | -0.0807030 |
| C | -3.4342340 | 3.3185690  | -0.0998430 |
| H | -4.2843120 | 3.1479760  | -0.7636520 |
| H | -3.7876130 | 3.6696300  | 0.8743450  |
| H | -2.7754800 | 4.0800230  | -0.5199400 |
| O | -8.3954450 | -0.9986400 | 0.2123500  |



#### 4e (ground state)

|   |            |            |            |
|---|------------|------------|------------|
| C | -3.1098310 | 1.0294330  | -0.0777510 |
| C | -1.3152110 | 2.5084260  | -0.1261020 |
| C | -0.8424610 | 1.1398900  | -0.1539000 |
| C | -1.9658020 | 0.2672700  | -0.1456790 |
| C | 0.2930650  | 0.3689740  | -0.1020320 |
| C | -1.4593560 | -1.1136500 | -0.1088390 |
| O | -2.0313460 | -2.1848660 | -0.1250900 |
| O | -0.7316160 | 3.5857740  | -0.1608260 |
| N | -2.7233520 | 2.3764650  | -0.0750670 |
| N | -0.0393520 | -0.9682540 | -0.0784840 |
| C | -4.4916140 | 0.5728850  | 0.0150210  |
| C | -5.5074720 | 1.3121420  | 0.6504800  |
| C | -4.8094400 | -0.6952910 | -0.4900150 |
| C | -6.7922340 | 0.8108170  | 0.7508290  |
| H | -5.2861320 | 2.2718540  | 1.1039560  |
| C | -6.0999020 | -1.2060350 | -0.3978740 |
| H | -4.0298870 | -1.3005920 | -0.9429360 |
| C | -7.1003140 | -0.4492960 | 0.2191600  |
| H | -7.5782920 | 1.3685940  | 1.2494520  |
| H | -6.3055030 | -2.1909060 | -0.8001700 |
| C | -8.7401940 | -2.1261640 | -0.1375890 |
| H | -9.8004570 | -2.2481290 | 0.0813210  |
| H | -8.5796980 | -2.1838320 | -1.2204300 |
| H | -8.1681590 | -2.9162940 | 0.3621350  |
| C | 1.6770310  | 0.7951910  | -0.0607110 |
| C | 2.6562740  | -0.2397490 | -0.0038360 |
| C | 2.1185020  | 2.0851390  | -0.0759170 |
| C | 3.5243210  | 2.3696800  | -0.0212160 |
| H | 1.4006670  | 2.9042890  | -0.1251290 |
| C | 4.4824820  | 1.3254300  | 0.0435370  |
| C | 4.6387240  | -1.2510990 | 0.0776020  |
| C | 3.5981330  | -2.1995250 | 0.0555810  |
| N | 4.0018060  | 0.0065370  | 0.0411720  |
| N | 2.3909050  | -1.5331350 | 0.0051640  |
| B | 0.9191920  | -2.1820610 | -0.0537500 |
| F | 0.8668110  | -2.9348320 | -1.2080080 |
| F | 0.7826970  | -2.9533110 | 1.0798810  |
| C | 5.9728330  | -1.6729300 | 0.1194130  |
| C | 6.2068280  | -3.0410290 | 0.1429380  |
| H | 6.8137470  | -0.9953800 | 0.1299640  |
| H | 7.2333660  | -3.3915020 | 0.1751840  |
| C | 3.8368500  | -3.5744190 | 0.0798520  |
| C | 5.1593050  | -3.9798510 | 0.1248110  |
| H | 3.0053080  | -4.2706030 | 0.0626790  |
| H | 5.3950350  | -5.0388200 | 0.1449620  |
| C | 3.9803870  | 3.7036120  | -0.0248320 |
| C | 5.3274270  | 3.9982690  | 0.0363000  |
| H | 3.2388360  | 4.4959660  | -0.0752950 |
| H | 5.6634310  | 5.0297990  | 0.0331860  |
| C | 5.8465140  | 1.6302890  | 0.1102150  |
| C | 6.2588110  | 2.9533240  | 0.1060130  |
| H | 6.5871360  | 0.8482410  | 0.1704260  |
| H | 7.3201900  | 3.1742110  | 0.1591350  |
| C | -3.5597660 | 3.5470560  | -0.2664410 |
| H | -4.4123060 | 3.2989680  | -0.9017960 |
| H | -3.9161430 | 3.9531040  | 0.6853620  |
| H | -2.9447670 | 4.3069240  | -0.7524790 |
| O | -8.3859480 | -0.8504480 | 0.3607590  |

**4e (excited state)**

|   |            |            |            |
|---|------------|------------|------------|
| C | 3.1458740  | 1.0744350  | 0.0563420  |
| C | 1.3268350  | 2.5303690  | 0.1005390  |
| C | 0.8565110  | 1.1661010  | 0.0979510  |
| C | 1.9554710  | 0.3113350  | 0.0900490  |
| C | -0.3263600 | 0.3697700  | 0.0493380  |
| C | 1.4431700  | -1.0755190 | 0.0299100  |
| O | 2.0205100  | -2.1395020 | 0.0090810  |
| O | 0.7739560  | 3.6210060  | 0.1419520  |
| N | 2.7566390  | 2.3919060  | 0.0706460  |
| N | 0.0223030  | -0.9405790 | 0.0136580  |
| C | 4.5050450  | 0.5904250  | -0.0135510 |
| C | 5.5715790  | 1.3397610  | -0.5623800 |
| C | 4.7805620  | -0.7142280 | 0.4394220  |
| C | 6.8455610  | 0.8149320  | -0.6308690 |
| H | 5.3936290  | 2.3234770  | -0.9801510 |
| C | 6.0604450  | -1.2463630 | 0.3790240  |
| H | 3.9749370  | -1.3248770 | 0.8342910  |
| C | 7.1051720  | -0.4801620 | -0.1525100 |
| H | 7.6647190  | 1.3784430  | -1.0655600 |
| H | 6.2289940  | -2.2535030 | 0.7414550  |
| C | 8.6957970  | -2.2078040 | 0.1882310  |
| H | 9.7623640  | -2.3353840 | 0.0082790  |
| H | 8.4870410  | -2.3168890 | 1.2583960  |
| H | 8.1336210  | -2.9587540 | -0.3779110 |
| C | -1.6872030 | 0.7807000  | 0.0367640  |
| C | -2.6517480 | -0.2477650 | -0.0115870 |
| C | -2.1358100 | 2.1022840  | 0.0793390  |
| C | -3.5252420 | 2.3731650  | 0.0410630  |
| H | -1.4183210 | 2.9192450  | 0.1284270  |
| C | -4.4890070 | 1.3183600  | -0.0308760 |
| C | -4.6393880 | -1.2620370 | -0.0311530 |
| C | -3.6031630 | -2.2172940 | -0.0464780 |
| N | -4.0001810 | -0.0070560 | -0.0212250 |
| N | -2.3904220 | -1.5512600 | -0.0332480 |
| B | -0.9411390 | -2.1812330 | -0.0182950 |
| F | -0.8040120 | -2.9444030 | 1.1211680  |
| F | -0.7683640 | -2.9172140 | -1.1692890 |
| C | -5.9731830 | -1.6791890 | -0.0052840 |
| C | -6.2176520 | -3.0494020 | -0.0163330 |
| H | -6.8087360 | -0.9965400 | 0.0368910  |
| H | -7.2469120 | -3.3929240 | 0.0036390  |
| C | -3.8497570 | -3.5874010 | -0.0586530 |
| C | -5.1780980 | -3.9903220 | -0.0471960 |
| H | -3.0240450 | -4.2906530 | -0.0715570 |
| H | -5.4166630 | -5.0488920 | -0.0556710 |
| C | -4.0101650 | 3.7060940  | 0.0521590  |
| C | -5.3599120 | 3.9829220  | -0.0202000 |
| H | -3.2810980 | 4.5093800  | 0.1126200  |
| H | -5.7047320 | 5.0121800  | -0.0116970 |
| C | -5.8473520 | 1.6110870  | -0.1218260 |
| C | -6.2833200 | 2.9336570  | -0.1150700 |
| H | -6.5767750 | 0.8213760  | -0.2141920 |
| H | -7.3456860 | 3.1420500  | -0.1875210 |
| C | 3.5816210  | 3.5735720  | 0.2443610  |
| H | 4.4239320  | 3.3472370  | 0.9012970  |
| H | 3.9485150  | 3.9521180  | -0.7143250 |
| H | 2.9490210  | 4.3396410  | 0.6954780  |
| O | 8.3826850  | -0.8997530 | -0.2572320 |

**3f (ground state)**

|   |             |            |            |
|---|-------------|------------|------------|
| C | -3.7460690  | -0.8141360 | -0.0128160 |
| C | -1.8160550  | -2.0956010 | -0.2159960 |
| C | -1.4663420  | -0.7038530 | -0.0004610 |
| C | -2.6779890  | 0.0405850  | 0.1385300  |
| C | -0.4044130  | 0.1754190  | 0.0515270  |
| C | -2.3304800  | 1.4538170  | 0.2983800  |
| O | -2.9959980  | 2.4593750  | 0.4712990  |
| O | -1.1480180  | -3.1120570 | -0.3562620 |
| N | -3.2343870  | -2.0961240 | -0.2169940 |
| N | -0.9185980  | 1.4408830  | 0.2361810  |
| C | -5.1685610  | -0.4897540 | -0.0067820 |
| C | -6.1244050  | -1.2186660 | -0.7396250 |
| C | -5.5958010  | 0.6395160  | 0.7037680  |
| C | -7.4554310  | -0.8442110 | -0.7381310 |
| H | -5.8213110  | -2.0647970 | -1.3463560 |
| C | -6.9333910  | 1.0214280  | 0.7157040  |
| H | -4.8675380  | 1.2399710  | 1.2403800  |
| C | -7.8716190  | 0.2743980  | -0.0026950 |
| H | -8.1969090  | -1.3931990 | -1.3094820 |
| H | -7.2248850  | 1.9006240  | 1.2779850  |
| C | -9.6602290  | 1.6912170  | 0.6475810  |
| H | -10.7336360 | 1.7353610  | 0.4666290  |
| H | -9.4730000  | 1.5896420  | 1.7228810  |
| H | -9.1866390  | 2.6071420  | 0.2759520  |
| C | 1.0201900   | -0.0903840 | -0.0536560 |
| C | 1.9825240   | 0.9826490  | 0.0048300  |
| C | 1.4835910   | -1.3543650 | -0.2930300 |
| C | 2.8837010   | -1.6478110 | -0.3103270 |
| H | 0.7777650   | -2.1747050 | -0.4159190 |
| C | 3.8198710   | -0.6359740 | -0.0696220 |
| C | 3.9862810   | 1.9074510  | -0.3015430 |
| C | 2.9633890   | 2.8719840  | -0.1870610 |
| N | 3.3465270   | 0.6776650  | -0.0956810 |
| N | 1.7400310   | 2.2734930  | 0.0022570  |
| C | 5.2795310   | 2.2658690  | -0.7044860 |
| C | 5.5364660   | 3.6158610  | -0.8868650 |
| H | 6.0506960   | 1.5288160  | -0.8920910 |
| H | 6.5291930   | 3.9229500  | -1.2007800 |
| C | 3.2468300   | 4.2351080  | -0.3550740 |
| C | 4.5391310   | 4.5937160  | -0.6919920 |
| H | 2.4537410   | 4.9683090  | -0.2496040 |
| H | 4.7869590   | 5.6403850  | -0.8391590 |
| C | 3.3345740   | -2.9895330 | -0.5010430 |
| C | 4.6550830   | -3.3032940 | -0.4025810 |
| H | 2.5914210   | -3.7466100 | -0.7353070 |
| H | 5.0018460   | -4.3175850 | -0.5790300 |
| C | 5.1713040   | -0.9825740 | 0.2746420  |
| C | 5.5947630   | -2.3224980 | 0.0377290  |
| H | -0.3332060  | 2.2720190  | 0.2742320  |
| C | -3.9481560  | -3.3597100 | -0.1895350 |
| H | -4.8076250  | -3.2895180 | 0.4799130  |
| H | -4.2821960  | -3.6597590 | -1.1876070 |
| H | -3.2522630  | -4.1158520 | 0.1785060  |
| O | -9.1946220  | 0.5569860  | -0.0580140 |
| C | 6.0550100   | -0.1125670 | 0.9664210  |
| C | 7.3299070   | -0.5120230 | 1.2922440  |
| H | 5.7089290   | 0.8647490  | 1.2807260  |
| H | 7.9806720   | 0.1646170  | 1.8376630  |
| C | 6.9299400   | -2.6882200 | 0.3395690  |

|   |           |            |           |
|---|-----------|------------|-----------|
| C | 7.7896580 | -1.7999960 | 0.9398310 |
| H | 7.2496770 | -3.7034400 | 0.1190350 |
| H | 8.8055870 | -2.0980780 | 1.1802630 |

**3f (excited state)**

|   |             |            |            |
|---|-------------|------------|------------|
| C | -3.7724550  | -0.8559000 | -0.0398890 |
| C | -1.8224290  | -2.1104480 | -0.2566920 |
| C | -1.4755980  | -0.7216090 | -0.0447130 |
| C | -2.6564190  | 0.0073490  | 0.1017340  |
| C | -0.3638030  | 0.1789750  | 0.0283050  |
| C | -2.3030960  | 1.4305660  | 0.2649680  |
| O | -2.9820300  | 2.4299110  | 0.4163440  |
| O | -1.1716470  | -3.1386110 | -0.4001780 |
| N | -3.2556660  | -2.1113620 | -0.2467900 |
| N | -0.8992690  | 1.4273950  | 0.2216280  |
| C | -5.1714610  | -0.5064180 | -0.0137830 |
| C | -6.1774270  | -1.2656530 | -0.6583460 |
| C | -5.5625970  | 0.6774600  | 0.6436800  |
| C | -7.4986770  | -0.8707520 | -0.6222220 |
| H | -5.9167650  | -2.1476030 | -1.2310800 |
| C | -6.8905490  | 1.0772880  | 0.6877870  |
| H | -4.8094900  | 1.3003290  | 1.1157500  |
| C | -7.8709440  | 0.2996270  | 0.0594880  |
| H | -8.2709140  | -1.4409260 | -1.1285060 |
| H | -7.1468890  | 1.9931570  | 1.2072720  |
| C | -9.6142350  | 1.7785930  | 0.6951550  |
| H | -10.6936650 | 1.8224460  | 0.5560020  |
| H | -9.3821610  | 1.7411020  | 1.7655920  |
| H | -9.1483040  | 2.6629590  | 0.2460240  |
| C | 1.0156680   | -0.0848990 | -0.0685870 |
| C | 1.9819400   | 0.9850370  | -0.0109880 |
| C | 1.4952450   | -1.3748930 | -0.3346330 |
| C | 2.8739220   | -1.6535680 | -0.3401610 |
| H | 0.7876900   | -2.1890370 | -0.4826810 |
| C | 3.8192490   | -0.6347370 | -0.0729820 |
| C | 3.9848640   | 1.9079150  | -0.3156640 |
| C | 2.9651870   | 2.8771130  | -0.2063540 |
| N | 3.3420830   | 0.6809670  | -0.1058500 |
| N | 1.7389600   | 2.2771920  | -0.0152450 |
| C | 5.2812020   | 2.2587760  | -0.7077270 |
| C | 5.5449100   | 3.6098230  | -0.8918190 |
| H | 6.0507320   | 1.5163790  | -0.8815200 |
| H | 6.5419680   | 3.9123490  | -1.1965900 |
| C | 3.2530200   | 4.2362070  | -0.3772120 |
| C | 4.5512470   | 4.5901980  | -0.7081420 |
| H | 2.4626370   | 4.9735600  | -0.2795540 |
| H | 4.8029420   | 5.6357620  | -0.8568850 |
| C | 3.3510290   | -2.9928060 | -0.5442110 |
| C | 4.6664070   | -3.2979160 | -0.4035980 |
| H | 2.6222930   | -3.7523080 | -0.8144490 |
| H | 5.0248090   | -4.3083290 | -0.5812770 |
| C | 5.1525680   | -0.9766310 | 0.3076770  |
| C | 5.5926960   | -2.3171560 | 0.0778140  |
| H | -0.3179370  | 2.2642890  | 0.2591610  |
| C | -3.9561890  | -3.3827090 | -0.2534190 |
| H | -4.7983890  | -3.3474360 | 0.4406180  |
| H | -4.3107720  | -3.6413400 | -1.2556780 |
| H | -3.2402290  | -4.1427650 | 0.0629930  |
| O | -9.1879290  | 0.5960210  | 0.0432410  |
| C | 6.0241570   | -0.1022270 | 1.0150780  |
| C | 7.2951580   | -0.4975090 | 1.3639450  |
| H | 5.6694320   | 0.8745410  | 1.3220540  |
| H | 7.9336370   | 0.1841220  | 1.9181820  |
| C | 6.9162720   | -2.6774760 | 0.4107110  |

|   |           |            |           |
|---|-----------|------------|-----------|
| C | 7.7658850 | -1.7843880 | 1.0272560 |
| H | 7.2438440 | -3.6924700 | 0.1993010 |
| H | 8.7771500 | -2.0801000 | 1.2890910 |

**4f (ground state)**

|   |            |            |            |
|---|------------|------------|------------|
| C | 3.7212940  | -1.1305630 | -0.0265050 |
| C | 1.8247890  | -2.4726690 | 0.0900260  |
| C | 1.4508880  | -1.0824320 | -0.0667600 |
| C | 2.6332610  | -0.2967810 | -0.1516150 |
| C | 0.3740490  | -0.2297780 | -0.0819290 |
| C | 2.2274080  | 1.1149430  | -0.2383160 |
| O | 2.8751330  | 2.1358210  | -0.3530980 |
| O | 1.1654070  | -3.5019050 | 0.1779880  |
| N | 3.2400010  | -2.4394260 | 0.1086590  |
| N | 0.8011110  | 1.0765530  | -0.1851470 |
| C | 5.1336050  | -0.7684710 | 0.0037870  |
| C | 6.1075340  | -1.5154500 | 0.6935960  |
| C | 5.5299490  | 0.4199500  | -0.6246970 |
| C | 7.4262450  | -1.1008630 | 0.7280500  |
| H | 5.8284780  | -2.4093860 | 1.2400680  |
| C | 6.8548150  | 0.8426190  | -0.5995790 |
| H | 4.7860840  | 1.0343530  | -1.1230090 |
| C | 7.8116680  | 0.0776200  | 0.0738180  |
| H | 8.1809640  | -1.6640380 | 1.2674020  |
| H | 7.1211470  | 1.7675680  | -1.0971920 |
| C | 9.5575290  | 1.5919090  | -0.4620700 |
| H | 10.6278140 | 1.6579270  | -0.2694450 |
| H | 9.3803080  | 1.5594960  | -1.5433620 |
| H | 9.0518910  | 2.4640600  | -0.0320100 |
| C | -1.0357720 | -0.5461200 | 0.0070500  |
| C | -1.9340390 | 0.5555570  | -0.0321810 |
| C | -1.5720480 | -1.7824400 | 0.2387160  |
| C | -2.9917300 | -1.9592030 | 0.2811430  |
| H | -0.9146420 | -2.6446770 | 0.3522470  |
| C | -3.8618630 | -0.8765300 | 0.0806580  |
| C | -3.8097060 | 1.7002790  | 0.3162140  |
| C | -2.7157110 | 2.5741600  | 0.1865560  |
| N | -3.2912820 | 0.4044500  | 0.0916400  |
| N | -1.5755360 | 1.8289310  | -0.0338020 |
| B | -0.0641660 | 2.3605570  | -0.1793220 |
| F | 0.0004970  | 3.0603050  | -1.3645710 |
| F | 0.1784580  | 3.1627040  | 0.9161210  |
| C | -5.0550510 | 2.1767340  | 0.7413540  |
| C | -5.1756600 | 3.5450120  | 0.9324950  |
| H | -5.8883960 | 1.5147850  | 0.9397440  |
| H | -6.1287870 | 3.9435230  | 1.2649150  |
| C | -2.8452060 | 3.9545840  | 0.3625960  |
| C | -4.0951880 | 4.4251390  | 0.7237720  |
| H | -1.9821180 | 4.6011160  | 0.2474880  |
| H | -4.2405440 | 5.4890220  | 0.8808780  |
| C | -3.5449140 | -3.2626230 | 0.4815060  |
| C | -4.8882810 | -3.4680460 | 0.4314830  |
| H | -2.8579910 | -4.0789230 | 0.6849920  |
| H | -5.3067190 | -4.4533020 | 0.6166430  |
| C | -5.2473330 | -1.1098860 | -0.2138790 |
| C | -5.7658130 | -2.4133450 | 0.0335100  |
| C | 3.9869210  | -3.6809330 | 0.0262680  |
| H | 4.8421930  | -3.5604050 | -0.6416350 |
| H | 4.3323570  | -4.0148880 | 1.0096320  |
| H | 3.3098270  | -4.4387620 | -0.3725780 |
| O | 9.1249690  | 0.3968970  | 0.1592470  |
| C | -6.0838440 | -0.1673880 | -0.8671980 |
| C | -7.3988670 | -0.4621620 | -1.1421150 |
| H | -5.6730200 | 0.7784280  | -1.1995980 |

|   |            |            |            |
|---|------------|------------|------------|
| H | -8.0141040 | 0.2668390  | -1.6604760 |
| C | -7.1356610 | -2.6707100 | -0.2166860 |
| C | -7.9453810 | -1.7116070 | -0.7768180 |
| H | -7.5257420 | -3.6594090 | 0.0103050  |
| H | -8.9902180 | -1.9263060 | -0.9783900 |



**4f (excited state)**

|   |             |            |            |
|---|-------------|------------|------------|
| C | -3.7516260  | -1.1721390 | -0.0034900 |
| C | -1.8354070  | -2.4925190 | -0.1151850 |
| C | -1.4626690  | -1.1064920 | 0.0355810  |
| C | -2.6187420  | -0.3353970 | 0.1181920  |
| C | -0.3389090  | -0.2307940 | 0.0842000  |
| C | -2.2046420  | 1.0819140  | 0.2165380  |
| O | -2.8552900  | 2.0981970  | 0.3126690  |
| O | -1.2047850  | -3.5376170 | -0.1931950 |
| N | -3.2710850  | -2.4529650 | -0.1368850 |
| N | -0.7777480  | 1.0490200  | 0.1901750  |
| C | -5.1420850  | -0.7807500 | -0.0199910 |
| C | -6.1573890  | -1.5371170 | -0.6501800 |
| C | -5.5048440  | 0.4423990  | 0.5761700  |
| C | -7.4654880  | -1.0989960 | -0.6597450 |
| H | -5.9141060  | -2.4528030 | -1.1757050 |
| C | -6.8192890  | 0.8861200  | 0.5761620  |
| H | -4.7409120  | 1.0604880  | 1.0367360  |
| C | -7.8116820  | 0.1125530  | -0.0385450 |
| H | -8.2463430  | -1.6661830 | -1.1558200 |
| H | -7.0552620  | 1.8319310  | 1.0492590  |
| C | -9.5169470  | 1.6748450  | 0.4930610  |
| H | -10.5911450 | 1.7460120  | 0.3280360  |
| H | -9.3083940  | 1.6781570  | 1.5687980  |
| H | -9.0131780  | 2.5221150  | 0.0147700  |
| C | 1.0461590   | -0.5376610 | 0.0139120  |
| C | 1.9331160   | 0.5592780  | 0.0437650  |
| C | 1.5887780   | -1.8022740 | -0.2514470 |
| C | 2.9872720   | -1.9664520 | -0.3031870 |
| H | 0.9291120   | -2.6591040 | -0.3768650 |
| C | 3.8663450   | -0.8756760 | -0.0847420 |
| C | 3.8049200   | 1.6989130  | -0.3506170 |
| C | 2.7212930   | 2.5848540  | -0.2059590 |
| N | 3.2877360   | 0.4122940  | -0.0986160 |
| N | 1.5794440   | 1.8421260  | 0.0495910  |
| B | 0.0940940   | 2.3578550  | 0.2128660  |
| F | -0.0238790  | 3.0105490  | 1.4197180  |
| F | -0.2053570  | 3.1700260  | -0.8591530 |
| C | 5.0477450   | 2.1589120  | -0.7922210 |
| C | 5.1813260   | 3.5284360  | -0.9935230 |
| H | 5.8708240   | 1.4837040  | -0.9900940 |
| H | 6.1354350   | 3.9150610  | -1.3372710 |
| C | 2.8615830   | 3.9583240  | -0.3947440 |
| C | 4.1146500   | 4.4171210  | -0.7785660 |
| H | 2.0090720   | 4.6178210  | -0.2745310 |
| H | 4.2654630   | 5.4789160  | -0.9447960 |
| C | 3.5672140   | -3.2640790 | -0.5145750 |
| C | 4.9078310   | -3.4592450 | -0.4248720 |
| H | 2.8949080   | -4.0849940 | -0.7481380 |
| H | 5.3374210   | -4.4404530 | -0.6087420 |
| C | 5.2352770   | -1.0993230 | 0.2398020  |
| C | 5.7740600   | -2.4030300 | 0.0048090  |
| C | -4.0103250  | -3.7017550 | -0.0997980 |
| H | -4.8618040  | -3.6115500 | 0.5778100  |
| H | -4.3565370  | -3.9939410 | -1.0956300 |
| H | -3.3227250  | -4.4677100 | 0.2622760  |
| O | -9.1160150  | 0.4500640  | -0.0959400 |
| C | 6.0648660   | -0.1448640 | 0.8933810  |
| C | 7.3793280   | -0.4306450 | 1.1832240  |
| H | 5.6463580   | 0.8025780  | 1.2118350  |

|   |           |            |           |
|---|-----------|------------|-----------|
| H | 7.9850050 | 0.3092970  | 1.6981710 |
| C | 7.1356980 | -2.6500470 | 0.2792390 |
| C | 7.9382830 | -1.6802710 | 0.8413330 |
| H | 7.5342400 | -3.6389480 | 0.0661860 |
| H | 8.9813250 | -1.8881850 | 1.0583020 |

### 3g (ground state)

|   |            |            |            |
|---|------------|------------|------------|
| C | 1.9273480  | 0.7190670  | -0.0120790 |
| C | 0.1083310  | 2.1408160  | 0.2498490  |
| C | -0.3473650 | 0.7703470  | 0.0843890  |
| C | 0.8036890  | -0.0650000 | -0.0582580 |
| C | -1.4717080 | -0.0171880 | -0.0407540 |
| C | 0.3529950  | -1.4389050 | -0.2895900 |
| O | 0.9390760  | -2.4875690 | -0.4806970 |
| O | -0.4774200 | 3.1986440  | 0.4400330  |
| N | 1.5188560  | 2.0409390  | 0.1684950  |
| N | -1.0570800 | -1.3159560 | -0.2480920 |
| C | 3.3279970  | 0.3427970  | -0.2015400 |
| C | 4.1774390  | 1.1050770  | -1.0122020 |
| C | 3.8151490  | -0.8557610 | 0.3648250  |
| C | 5.4773110  | 0.6923760  | -1.2820740 |
| H | 3.7923800  | 2.0115990  | -1.4702630 |
| C | 5.1178070  | -1.2773660 | 0.0816670  |
| C | 5.9380080  | -0.5043490 | -0.7361760 |
| H | 6.1161890  | 1.2875060  | -1.9260760 |
| H | 5.4941880  | -2.2020700 | 0.5037720  |
| C | -2.8769660 | 0.3528590  | 0.0104250  |
| C | -3.8951400 | -0.6380930 | -0.1579940 |
| C | -3.2607100 | 1.6607340  | 0.2225320  |
| C | -4.6354360 | 2.0138260  | 0.2688960  |
| H | -2.4996980 | 2.4268320  | 0.3549520  |
| C | -5.6003720 | 1.0657940  | 0.1060900  |
| C | -5.9906360 | -1.3702920 | -0.2933230 |
| C | -5.0876180 | -2.3921360 | -0.4519440 |
| N | -5.2283820 | -0.2371340 | -0.1032930 |
| N | -3.8024530 | -1.9438410 | -0.3689520 |
| H | -1.7065000 | -2.0887630 | -0.3776130 |
| C | 2.3510000  | 3.1913210  | 0.4657340  |
| H | 3.2663490  | 2.8665140  | 0.9634890  |
| H | 2.6072260  | 3.7500180  | -0.4401340 |
| H | 1.7812710  | 3.8493770  | 1.1246780  |
| H | 6.9476960  | -0.8450720 | -0.9462660 |
| O | 2.9802220  | -1.5116910 | 1.1923540  |
| C | 3.2340740  | -2.8806810 | 1.4541940  |
| H | 3.3599240  | -3.4302500 | 0.5160090  |
| H | 4.1152850  | -3.0014520 | 2.0956600  |
| H | 2.3496160  | -3.2512280 | 1.9704090  |
| H | -5.3047080 | -3.4372570 | -0.6234770 |
| H | -7.0690070 | -1.3371780 | -0.2965130 |
| H | -6.6656580 | 1.2629670  | 0.1298320  |
| H | -4.9273540 | 3.0438620  | 0.4349080  |

**3g (excited state)**

|   |            |            |            |
|---|------------|------------|------------|
| C | 1.9747160  | 0.7584240  | 0.0043040  |
| C | 0.1275350  | 2.1577870  | 0.2272490  |
| C | -0.3248740 | 0.7906240  | 0.0939900  |
| C | 0.7950480  | -0.0317880 | -0.0246490 |
| C | -1.5011260 | -0.0145940 | -0.0395350 |
| C | 0.3370270  | -1.4106240 | -0.2915470 |
| O | 0.9379380  | -2.4431260 | -0.5252070 |
| O | -0.4350670 | 3.2335560  | 0.3960550  |
| N | 1.5575220  | 2.0533210  | 0.1480600  |
| N | -1.0634040 | -1.2994450 | -0.2516580 |
| C | 3.3462740  | 0.3482750  | -0.1837350 |
| C | 4.2519250  | 1.0974460  | -0.9585130 |
| C | 3.7837870  | -0.8865720 | 0.3638300  |
| C | 5.5306720  | 0.6281550  | -1.2203720 |
| H | 3.9180210  | 2.0286260  | -1.4057900 |
| C | 5.0632330  | -1.3659200 | 0.0778940  |
| C | 5.9284540  | -0.6097810 | -0.7099530 |
| H | 6.2061270  | 1.2088670  | -1.8400000 |
| H | 5.3923060  | -2.3158970 | 0.4833880  |
| C | -2.8650250 | 0.3510530  | 0.0173170  |
| C | -3.8938600 | -0.6382100 | -0.1571860 |
| C | -3.2655080 | 1.6781110  | 0.2401590  |
| C | -4.6316400 | 2.0133310  | 0.2863160  |
| H | -2.5074210 | 2.4472010  | 0.3739900  |
| C | -5.6040640 | 1.0606250  | 0.1174320  |
| C | -5.9816450 | -1.3784810 | -0.2990620 |
| C | -5.0793490 | -2.3980310 | -0.4652630 |
| N | -5.2218220 | -0.2433630 | -0.1003790 |
| N | -3.7930220 | -1.9415100 | -0.3775350 |
| H | -1.7092440 | -2.0752910 | -0.3973510 |
| C | 2.3764030  | 3.2252060  | 0.3933550  |
| H | 3.3031540  | 2.9265960  | 0.8866550  |
| H | 2.6078280  | 3.7503210  | -0.5385050 |
| H | 1.8027100  | 3.8979060  | 1.0329950  |
| H | 6.9230400  | -0.9910400 | -0.9214630 |
| O | 2.9210440  | -1.4993420 | 1.1937900  |
| C | 3.1098390  | -2.8782850 | 1.4630650  |
| H | 3.2139760  | -3.4374180 | 0.5282300  |
| H | 3.9817900  | -3.0327360 | 2.1093690  |
| H | 2.2073810  | -3.2048060 | 1.9785060  |
| H | -5.2917270 | -3.4426100 | -0.6447040 |
| H | -7.0601610 | -1.3462280 | -0.3021530 |
| H | -6.6693540 | 1.2534480  | 0.1419050  |
| H | -4.9316080 | 3.0408450  | 0.4578460  |

**4g (ground state)**

|   |            |            |            |
|---|------------|------------|------------|
| C | 2.1887800  | 0.9057170  | -0.0232680 |
| C | 0.5057170  | 2.4942640  | 0.1851630  |
| C | -0.0600520 | 1.1622040  | 0.0729370  |
| C | 1.0001900  | 0.2216310  | -0.0408060 |
| C | -1.2433930 | 0.4726720  | -0.0065240 |
| C | 0.4053280  | -1.1133000 | -0.2115830 |
| O | 0.9035340  | -2.2082410 | -0.3639480 |
| O | -0.0035250 | 3.5980020  | 0.3353680  |
| N | 1.8991610  | 2.2703710  | 0.1055050  |
| N | -1.0056190 | -0.8777660 | -0.1667690 |
| C | 3.5499040  | 0.3987900  | -0.1865850 |
| C | 4.4745620  | 1.0499650  | -1.0121320 |
| C | 3.9161120  | -0.8219050 | 0.4236830  |
| C | 5.7307230  | 0.5062910  | -1.2548350 |
| H | 4.1814810  | 1.9724860  | -1.5049260 |
| C | 5.1746350  | -1.3750130 | 0.1669900  |
| C | 6.0705410  | -0.7109030 | -0.6663440 |
| H | 6.4281890  | 1.0156070  | -1.9115140 |
| H | 5.4566580  | -2.3175110 | 0.6220920  |
| C | -2.5992590 | 0.9782440  | 0.0518630  |
| C | -3.6145330 | 0.0045760  | -0.0564940 |
| C | -2.9917140 | 2.2905430  | 0.2041590  |
| C | -4.3786850 | 2.6046510  | 0.2404130  |
| H | -2.2373450 | 3.0703410  | 0.2948220  |
| C | -5.3359220 | 1.6361300  | 0.1303830  |
| C | -5.6558680 | -0.8583610 | -0.1511300 |
| C | -4.7252230 | -1.8530320 | -0.2637320 |
| N | -4.9414620 | 0.3260520  | -0.0187480 |
| N | -3.4712050 | -1.3095580 | -0.2038240 |
| B | -2.0312400 | -2.0371200 | -0.2845410 |
| F | -1.9690010 | -2.9114620 | 0.7787720  |
| F | -1.9799440 | -2.6772980 | -1.5014140 |
| C | 2.8324030  | 3.3507850  | 0.3622840  |
| H | 3.7059910  | 2.9670280  | 0.8923920  |
| H | 3.1537650  | 3.8374990  | -0.5640610 |
| H | 2.3181040  | 4.0908310  | 0.9786490  |
| H | 7.0443560  | -1.1531280 | -0.8557860 |
| O | 3.0180910  | -1.3663590 | 1.2635860  |
| C | 3.1281860  | -2.7479990 | 1.5639730  |
| H | 3.2122010  | -3.3311250 | 0.6418220  |
| H | 3.9834160  | -2.9376740 | 2.2237220  |
| H | 2.2019480  | -3.0143150 | 2.0708450  |
| H | -4.6954430 | 3.6341920  | 0.3584810  |
| H | -6.4030770 | 1.8174470  | 0.1518730  |
| H | -6.7338320 | -0.8766840 | -0.1521990 |
| H | -4.8652240 | -2.9171610 | -0.3833960 |

**4g (excited state)**

|   |            |            |            |
|---|------------|------------|------------|
| C | 2.2366500  | 0.9409750  | -0.0057360 |
| C | 0.5234670  | 2.5110130  | 0.1693420  |
| C | -0.0399140 | 1.1881390  | 0.0846230  |
| C | 0.9950180  | 0.2613370  | -0.0077260 |
| C | -1.2722650 | 0.4828480  | -0.0016120 |
| C | 0.3899330  | -1.0769180 | -0.2084680 |
| O | 0.9007920  | -2.1589910 | -0.3977340 |
| O | 0.0525410  | 3.6343530  | 0.2965180  |
| N | 1.9420860  | 2.2741040  | 0.0948340  |
| N | -1.0142330 | -0.8515050 | -0.1665730 |
| C | 3.5678490  | 0.3982260  | -0.1708640 |
| C | 4.5351450  | 1.0280060  | -0.9742160 |
| C | 3.8869580  | -0.8473690 | 0.4288070  |
| C | 5.7652780  | 0.4330830  | -1.2130110 |
| H | 4.2872450  | 1.9665010  | -1.4605250 |
| C | 5.1184130  | -1.4528260 | 0.1682520  |
| C | 6.0475660  | -0.8126560 | -0.6475920 |
| H | 6.4905130  | 0.9217870  | -1.8551480 |
| H | 5.3581620  | -2.4117080 | 0.6133730  |
| C | -2.6013020 | 0.9723340  | 0.0603880  |
| C | -3.6181020 | -0.0034820 | -0.0528380 |
| C | -3.0126950 | 2.3057060  | 0.2200230  |
| C | -4.3901690 | 2.5981890  | 0.2557920  |
| H | -2.2658900 | 3.0915280  | 0.3113720  |
| C | -5.3535980 | 1.6223740  | 0.1411660  |
| C | -5.6512860 | -0.8787440 | -0.1529440 |
| C | -4.7236030 | -1.8727560 | -0.2710500 |
| N | -4.9418840 | 0.3075470  | -0.0144550 |
| N | -3.4675660 | -1.3189420 | -0.2068780 |
| B | -2.0443250 | -2.0273620 | -0.2974970 |
| F | -1.9333780 | -2.9091380 | 0.7564260  |
| F | -1.9536100 | -2.6502780 | -1.5211950 |
| C | 2.8661750  | 3.3745570  | 0.2917030  |
| H | 3.7613490  | 3.0146200  | 0.8022220  |
| H | 3.1457430  | 3.8339780  | -0.6614250 |
| H | 2.3563750  | 4.1249950  | 0.8982510  |
| H | 7.0029590  | -1.2919540 | -0.8396100 |
| O | 2.9701230  | -1.3466270 | 1.2741680  |
| C | 3.0213400  | -2.7299540 | 1.5888160  |
| H | 3.0865670  | -3.3253610 | 0.6732980  |
| H | 3.8646280  | -2.9442990 | 2.2555130  |
| H | 2.0827340  | -2.9526760 | 2.0946510  |
| H | -4.7173780 | 3.6247540  | 0.3776260  |
| H | -6.4212300 | 1.7937260  | 0.1623730  |
| H | -6.7292910 | -0.8989300 | -0.1540740 |
| H | -4.8595690 | -2.9362130 | -0.3967350 |

### 3i (ground state)

|   |            |            |            |
|---|------------|------------|------------|
| C | 3.3580260  | 0.6656660  | -0.0987220 |
| C | 1.5682690  | 2.1417610  | 0.0200860  |
| C | 1.0852140  | 0.7716290  | 0.0045030  |
| C | 2.2191540  | -0.0961930 | -0.0553360 |
| C | -0.0560090 | -0.0038630 | -0.0239330 |
| C | 1.7409420  | -1.4776280 | -0.1323760 |
| O | 2.3042320  | -2.5525770 | -0.2135680 |
| O | 1.0038080  | 3.2264820  | 0.0993330  |
| N | 2.9752080  | 2.0068380  | -0.0581860 |
| N | 0.3335710  | -1.3235140 | -0.0926470 |
| C | 4.7501470  | 0.2432670  | -0.2501640 |
| C | 5.6110630  | 0.8944210  | -1.1415710 |
| C | 5.2160690  | -0.8952720 | 0.4436820  |
| C | 6.9017980  | 0.4290020  | -1.3662010 |
| H | 5.2419520  | 1.7519110  | -1.6968460 |
| C | 6.5094600  | -1.3706880 | 0.2071640  |
| C | 7.3414980  | -0.7087140 | -0.6919780 |
| H | 7.5495860  | 0.9365750  | -2.0731710 |
| H | 6.8694780  | -2.2503910 | 0.7281190  |
| C | -1.4505420 | 0.4108950  | 0.0051070  |
| C | -2.5174310 | -0.5634200 | -0.0534000 |
| C | -1.7806140 | 1.7317700  | 0.0804330  |
| C | -3.1481980 | 2.1602420  | 0.1311900  |
| H | -0.9958300 | 2.4863790  | 0.1172560  |
| C | -4.1994240 | 1.2139270  | 0.0933600  |
| C | -4.6226750 | -1.2924870 | -0.1533200 |
| C | -3.6840740 | -2.3473440 | -0.2069460 |
| N | -3.8479560 | -0.1329190 | -0.0385130 |
| N | -2.3976080 | -1.8661440 | -0.1449380 |
| C | -5.9965590 | -1.5542630 | -0.2471990 |
| C | -6.3901570 | -2.8798780 | -0.3668960 |
| H | -6.7537670 | -0.7837960 | -0.2508420 |
| H | -7.4496100 | -3.1037120 | -0.4428550 |
| C | -4.1000620 | -3.6789620 | -0.3252900 |
| C | -5.4577180 | -3.9334010 | -0.3997420 |
| H | -3.3607360 | -4.4725070 | -0.3624400 |
| H | -5.8124130 | -4.9550350 | -0.4936840 |
| C | -3.4613830 | 3.5283970  | 0.2460610  |
| C | -4.7723350 | 3.9545510  | 0.3345100  |
| H | -2.6403950 | 4.2400070  | 0.2695070  |
| H | -5.0024990 | 5.0110990  | 0.4231060  |
| C | -5.5255680 | 1.6508370  | 0.2064200  |
| C | -5.8019040 | 3.0048800  | 0.3225910  |
| H | -0.3330360 | -2.0904350 | -0.1377160 |
| C | 3.8313630  | 3.1662580  | 0.1066530  |
| H | 4.7434200  | 2.8800530  | 0.6333270  |
| H | 4.0925070  | 3.6161310  | -0.8565360 |
| H | 3.2787520  | 3.9041620  | 0.6913550  |
| H | 8.3437760  | -1.0899550 | -0.8645800 |
| O | 4.3712110  | -1.4406140 | 1.3387460  |
| C | 4.6016320  | -2.7763490 | 1.7508720  |
| H | 4.7160270  | -3.4288780 | 0.8795450  |
| H | 5.4820360  | -2.8407190 | 2.4015080  |
| H | 3.7120120  | -3.0716000 | 2.3053810  |
| H | -6.3418040 | 0.9462090  | 0.2250040  |
| H | -6.8358540 | 3.3241120  | 0.4111050  |

### 3i (excited state)

|   |            |            |            |
|---|------------|------------|------------|
| C | 3.3984340  | 0.7043460  | -0.0897020 |
| C | 1.5837560  | 2.1580860  | -0.0160580 |
| C | 1.1039170  | 0.7927540  | 0.0121540  |
| C | 2.2079180  | -0.0585760 | -0.0188090 |
| C | -0.0895870 | -0.0048200 | -0.0151800 |
| C | 1.7246970  | -1.4500320 | -0.1147970 |
| O | 2.3021480  | -2.5137880 | -0.2261230 |
| O | 1.0458600  | 3.2586260  | 0.0310600  |
| N | 3.0098750  | 2.0161250  | -0.0924880 |
| N | 0.3240590  | -1.3096360 | -0.0769780 |
| C | 4.7623440  | 0.2476290  | -0.2380290 |
| C | 5.6692170  | 0.8805760  | -1.1076790 |
| C | 5.1844460  | -0.9184000 | 0.4514840  |
| C | 6.9376780  | 0.3615110  | -1.3226870 |
| H | 5.3444590  | 1.7559490  | -1.6617570 |
| C | 6.4539360  | -1.4496590 | 0.2155900  |
| C | 7.3215990  | -0.8101870 | -0.6668450 |
| H | 7.6149320  | 0.8502070  | -2.0153500 |
| H | 6.7728210  | -2.3486530 | 0.7305110  |
| C | -1.4398730 | 0.4036640  | 0.0110430  |
| C | -2.5082040 | -0.5670930 | -0.0430600 |
| C | -1.7833810 | 1.7542500  | 0.0705980  |
| C | -3.1348390 | 2.1660940  | 0.1284880  |
| H | -0.9984450 | 2.5085800  | 0.0932790  |
| C | -4.1926820 | 1.2101240  | 0.1108780  |
| C | -4.6109350 | -1.2956510 | -0.1635860 |
| C | -3.6747510 | -2.3537260 | -0.2088700 |
| N | -3.8356870 | -0.1381540 | -0.0349760 |
| N | -2.3868480 | -1.8717050 | -0.1341800 |
| C | -5.9821630 | -1.5511360 | -0.2876700 |
| C | -6.3796480 | -2.8764560 | -0.4190780 |
| H | -6.7330530 | -0.7746970 | -0.3124100 |
| H | -7.4382950 | -3.0951990 | -0.5184850 |
| C | -4.0928370 | -3.6817650 | -0.3379340 |
| C | -5.4519880 | -3.9321620 | -0.4358740 |
| H | -3.3565190 | -4.4785640 | -0.3677270 |
| H | -5.8077590 | -4.9526070 | -0.5390000 |
| C | -3.4728740 | 3.5385790  | 0.2403870  |
| C | -4.7850810 | 3.9460290  | 0.3568870  |
| H | -2.6618020 | 4.2620380  | 0.2427270  |
| H | -5.0242880 | 5.0012170  | 0.4438420  |
| C | -5.5144520 | 1.6329190  | 0.2625200  |
| C | -5.8084440 | 2.9870340  | 0.3809070  |
| H | -0.3399000 | -2.0819550 | -0.1296940 |
| C | 3.8547090  | 3.1914530  | 0.0087770  |
| H | 4.7826340  | 2.9313530  | 0.5210920  |
| H | 4.0820920  | 3.6032650  | -0.9792650 |
| H | 3.3041160  | 3.9436610  | 0.5760030  |
| H | 8.3077820  | -1.2311160 | -0.8388700 |
| O | 4.3194210  | -1.4144630 | 1.3538390  |
| C | 4.4939460  | -2.7523630 | 1.7893760  |
| H | 4.5815620  | -3.4237840 | 0.9297140  |
| H | 5.3705740  | -2.8383130 | 2.4419080  |
| H | 3.5931580  | -3.0004480 | 2.3494100  |
| H | -6.3198280 | 0.9167250  | 0.3156100  |
| H | -6.8426110 | 3.2948070  | 0.4992200  |



**4i (ground state)**

|   |            |            |            |
|---|------------|------------|------------|
| C | 3.4047090  | 0.9146360  | -0.0694880 |
| C | 1.6724340  | 2.4577670  | 0.0644490  |
| C | 1.1481270  | 1.1069440  | 0.0155710  |
| C | 2.2377500  | 0.1950280  | -0.0548040 |
| C | -0.0142890 | 0.3764150  | -0.0291270 |
| C | 1.6850440  | -1.1638980 | -0.1610740 |
| O | 2.2146540  | -2.2498120 | -0.2624810 |
| O | 1.1302120  | 3.5535630  | 0.1624490  |
| N | 3.0716700  | 2.2740560  | -0.0045830 |
| N | 0.2672520  | -0.9686640 | -0.1250010 |
| C | 4.7815060  | 0.4432830  | -0.2085800 |
| C | 5.6866310  | 1.0827070  | -1.0642350 |
| C | 5.1854830  | -0.7343170 | 0.4597690  |
| C | 6.9603790  | 0.5688230  | -1.2794180 |
| H | 5.3651620  | 1.9703170  | -1.6014390 |
| C | 6.4615710  | -1.2584710 | 0.2310000  |
| C | 7.3379120  | -0.6068940 | -0.6326940 |
| H | 7.6425410  | 1.0681510  | -1.9594790 |
| H | 6.7724660  | -2.1685660 | 0.7310740  |
| C | -1.3825750 | 0.8516020  | 0.0086790  |
| C | -2.4004800 | -0.1449020 | -0.0505830 |
| C | -1.7743640 | 2.1540700  | 0.1025420  |
| C | -3.1698230 | 2.4894550  | 0.1278780  |
| H | -1.0245770 | 2.9440800  | 0.1562970  |
| C | -4.1676720 | 1.4832560  | 0.0616830  |
| C | -4.4204230 | -1.0816140 | -0.0880530 |
| C | -3.4155490 | -2.0654720 | -0.1597760 |
| N | -3.7366180 | 0.1498860  | -0.0210480 |
| N | -2.1834760 | -1.4447680 | -0.1333170 |
| B | -0.7345310 | -2.1436910 | -0.1873360 |
| F | -0.6571360 | -2.9763290 | 0.9107450  |
| F | -0.6785280 | -2.8422880 | -1.3741320 |
| C | -5.7696560 | -1.4542510 | -0.0890660 |
| C | -6.0549800 | -2.8105760 | -0.1674600 |
| H | -6.5845840 | -0.7480950 | -0.0294420 |
| H | -7.0942210 | -3.1229940 | -0.1696040 |
| C | -3.7058130 | -3.4282770 | -0.2392020 |
| C | -5.0430720 | -3.7849660 | -0.2426770 |
| H | -2.9003890 | -4.1526870 | -0.2938150 |
| H | -5.3182770 | -4.8328470 | -0.3029420 |
| C | -3.5757210 | 3.8366400  | 0.2154640  |
| C | -4.9124340 | 4.1802840  | 0.2339520  |
| H | -2.8038530 | 4.5994440  | 0.2666520  |
| H | -5.2096680 | 5.2214940  | 0.3012050  |
| C | -5.5211680 | 1.8377770  | 0.0770480  |
| C | -5.8839010 | 3.1725970  | 0.1623580  |
| C | 3.9702080  | 3.3943630  | 0.1986920  |
| H | 4.8541520  | 3.0651300  | 0.7479640  |
| H | 4.2784690  | 3.8442880  | -0.7504690 |
| H | 3.4314360  | 4.1476680  | 0.7769140  |
| H | 8.3258470  | -1.0262090 | -0.7998270 |
| O | 4.3030080  | -1.2670110 | 1.3238790  |
| C | 4.4566050  | -2.6282630 | 1.6898180  |
| H | 4.5599720  | -3.2520450 | 0.7966230  |
| H | 5.3167610  | -2.7594280 | 2.3573890  |
| H | 3.5388820  | -2.8992640 | 2.2096120  |
| H | -6.9377720 | 3.4321810  | 0.1724300  |
| H | -6.2921090 | 1.0854600  | 0.0188780  |

**4i (excited state)**

|   |            |            |            |
|---|------------|------------|------------|
| C | 3.4462190  | 0.9493990  | -0.0477550 |
| C | 1.6926350  | 2.4747240  | 0.0691570  |
| C | 1.1677330  | 1.1299630  | 0.0300820  |
| C | 2.2317650  | 0.2343320  | -0.0273900 |
| C | -0.0441810 | 0.3771040  | -0.0323620 |
| C | 1.6731650  | -1.1270380 | -0.1750040 |
| O | 2.2063610  | -2.2017570 | -0.3165550 |
| O | 1.1907210  | 3.5872710  | 0.1552620  |
| N | 3.1153560  | 2.2777890  | 0.0059690  |
| N | 0.2526400  | -0.9397790 | -0.1449230 |
| C | 4.7970160  | 0.4432680  | -0.1893010 |
| C | 5.7404080  | 1.0741580  | -1.0180990 |
| C | 5.1578120  | -0.7641830 | 0.4600150  |
| C | 6.9926440  | 0.5163300  | -1.2317240 |
| H | 5.4585820  | 1.9825540  | -1.5417670 |
| C | 6.4129530  | -1.3320880 | 0.2278980  |
| C | 7.3195300  | -0.6919830 | -0.6128350 |
| H | 7.7005000  | 1.0043580  | -1.8933260 |
| H | 6.6876150  | -2.2621480 | 0.7120520  |
| C | -1.3889020 | 0.8376000  | 0.0122830  |
| C | -2.3919950 | -0.1502950 | -0.0586680 |
| C | -1.7835690 | 2.1717610  | 0.1338630  |
| C | -3.1619770 | 2.4958520  | 0.1489130  |
| H | -1.0335790 | 2.9576700  | 0.2015770  |
| C | -4.1672300 | 1.4823480  | 0.0533710  |
| C | -4.4172460 | -1.0876810 | -0.0692910 |
| C | -3.4195930 | -2.0789380 | -0.1643690 |
| N | -3.7301500 | 0.1405130  | -0.0157830 |
| N | -2.1818150 | -1.4603090 | -0.1533630 |
| B | -0.7572510 | -2.1396090 | -0.2243240 |
| F | -0.6108850 | -2.9780930 | 0.8616030  |
| F | -0.6469900 | -2.8096900 | -1.4224100 |
| C | -5.7648230 | -1.4554140 | -0.0233970 |
| C | -6.0630360 | -2.8132280 | -0.0966110 |
| H | -6.5713290 | -0.7448610 | 0.0796910  |
| H | -7.1039460 | -3.1183710 | -0.0623490 |
| C | -3.7199570 | -3.4361180 | -0.2392630 |
| C | -5.0623390 | -3.7893190 | -0.2077530 |
| H | -2.9232750 | -4.1683610 | -0.3140730 |
| H | -5.3418300 | -4.8363980 | -0.2633710 |
| C | -3.5945950 | 3.8435710  | 0.2390900  |
| C | -4.9342750 | 4.1737710  | 0.2191360  |
| H | -2.8337160 | 4.6151750  | 0.3175590  |
| H | -5.2386570 | 5.2134870  | 0.2877860  |
| C | -5.5150750 | 1.8295960  | 0.0156530  |
| C | -5.8995920 | 3.1657360  | 0.0995310  |
| C | 4.0072550  | 3.4106850  | 0.1706990  |
| H | 4.9109750  | 3.0927970  | 0.6935660  |
| H | 4.2753180  | 3.8494530  | -0.7951760 |
| H | 3.4754840  | 4.1637020  | 0.7546780  |
| H | 8.2927950  | -1.1427970 | -0.7828390 |
| O | 4.2545550  | -1.2667190 | 1.3181080  |
| C | 4.3663870  | -2.6299170 | 1.6980910  |
| H | 4.4614970  | -3.2647320 | 0.8120050  |
| H | 5.2163150  | -2.7754430 | 2.3746460  |
| H | 3.4374660  | -2.8697150 | 2.2137200  |
| H | -6.9547000 | 3.4167820  | 0.0676270  |
| H | -6.2765240 | 1.0731080  | -0.0946950 |

### 3j (ground state)

|   |             |            |            |
|---|-------------|------------|------------|
| C | -2.7491260  | 0.7867660  | -0.1240430 |
| C | -0.8950000  | 2.1925940  | -0.1047070 |
| C | -0.4643710  | 0.8082670  | -0.1687500 |
| C | -1.6308750  | -0.0164670 | -0.2022500 |
| C | 0.6484460   | -0.0063960 | -0.1297870 |
| C | -1.2014700  | -1.4141550 | -0.1993450 |
| O | -1.8043290  | -2.4730900 | -0.2467970 |
| O | -0.2869300  | 3.2558140  | -0.1000840 |
| N | -2.3096830  | 2.1117760  | -0.0731770 |
| N | 0.2072590   | -1.3119360 | -0.1534550 |
| C | -4.1454400  | 0.3856380  | -0.0693550 |
| C | -5.1452880  | 1.1403720  | 0.5651770  |
| C | -4.5150420  | -0.8593480 | -0.6091620 |
| C | -6.4551050  | 0.6960640  | 0.6333320  |
| H | -4.8969840  | 2.0756960  | 1.0550190  |
| C | -5.8208970  | -1.3101460 | -0.5557210 |
| H | -3.7554310  | -1.4909230 | -1.0601520 |
| C | -6.8358900  | -0.5368280 | 0.0544860  |
| H | -7.1826400  | 1.3073250  | 1.1534510  |
| H | -6.0492760  | -2.2782110 | -0.9844630 |
| N | -8.1394140  | -0.9697790 | 0.0900190  |
| C | -8.4569590  | -2.3130250 | -0.3541840 |
| H | -9.5303790  | -2.4750250 | -0.2535970 |
| H | -8.1945840  | -2.4476730 | -1.4092340 |
| H | -7.9316210  | -3.0783170 | 0.2347690  |
| C | -9.1157810  | -0.2330290 | 0.8665820  |
| H | -8.8544300  | -0.1962840 | 1.9342840  |
| H | -9.2130690  | 0.7944100  | 0.4984400  |
| H | -10.0877450 | -0.7164590 | 0.7657240  |
| C | 2.0562220   | 0.3561290  | -0.0674200 |
| C | 3.0834910   | -0.6610550 | -0.0223680 |
| C | 2.4390850   | 1.6647600  | -0.0458710 |
| C | 3.8221970   | 2.0409190  | -0.0014730 |
| H | 1.6860090   | 2.4509610  | -0.0744760 |
| C | 4.8351840   | 1.0537070  | 0.0288520  |
| C | 5.1538770   | -1.4787160 | 0.1179740  |
| C | 4.1753470   | -2.4963330 | 0.0577520  |
| N | 4.4285100   | -0.2839600 | 0.0514240  |
| N | 2.9119910   | -1.9612100 | -0.0263780 |
| C | 6.5116910   | -1.8020770 | 0.2482410  |
| C | 6.8498820   | -3.1476640 | 0.2896140  |
| H | 7.2970820   | -1.0654290 | 0.3343340  |
| H | 7.8961220   | -3.4186290 | 0.3912870  |
| C | 4.5354950   | -3.8486190 | 0.0989180  |
| C | 5.8781240   | -4.1624810 | 0.2104740  |
| H | 3.7658260   | -4.6120100 | 0.0484020  |
| H | 6.1897930   | -5.2017070 | 0.2458910  |
| C | 4.1907020   | 3.4000600  | -0.0104390 |
| C | 5.5190390   | 3.7791250  | -0.0014960 |
| H | 3.3984720   | 4.1436550  | -0.0302100 |
| H | 5.7913210   | 4.8293690  | -0.0088710 |
| C | 6.1803260   | 1.4443490  | 0.0174390  |
| C | 6.5117190   | 2.7909860  | 0.0048930  |
| H | 6.9706760   | 0.7109140  | 0.0002490  |
| H | 7.5598550   | 3.0739420  | -0.0053900 |
| H | 0.8413110   | -2.1069940 | -0.1453000 |
| C | -3.0959540  | 3.3200930  | -0.2389750 |
| H | -3.9501150  | 3.1238010  | -0.8900800 |
| H | -3.4471990  | 3.7120460  | 0.7206970  |

H -2.4453550 4.0685750 -0.6951000

### 3j (excited state)

|   |             |            |            |
|---|-------------|------------|------------|
| C | -2.7812990  | 0.8307930  | -0.0704560 |
| C | -0.9016780  | 2.2104590  | -0.0358810 |
| C | -0.4763740  | 0.8289170  | -0.0884770 |
| C | -1.6146080  | 0.0203550  | -0.1288940 |
| C | 0.6848870   | -0.0071890 | -0.0751210 |
| C | -1.1767760  | -1.3887160 | -0.1309930 |
| O | -1.7941330  | -2.4401360 | -0.1575650 |
| O | -0.3091630  | 3.2845550  | -0.0287140 |
| N | -2.3302810  | 2.1301460  | -0.0214170 |
| N | 0.2225920   | -1.2988170 | -0.1067550 |
| C | -4.1509900  | 0.4034980  | -0.0296920 |
| C | -5.2088230  | 1.1830430  | 0.4932080  |
| C | -4.4790100  | -0.8951320 | -0.4902010 |
| C | -6.5065560  | 0.7146990  | 0.5303730  |
| H | -5.0095160  | 2.1568350  | 0.9241880  |
| C | -5.7723080  | -1.3690980 | -0.4636800 |
| H | -3.6908180  | -1.5425430 | -0.8617150 |
| C | -6.8344820  | -0.5745260 | 0.0378790  |
| H | -7.2727740  | 1.3467130  | 0.9632240  |
| H | -5.9618530  | -2.3701510 | -0.8318440 |
| N | -8.1205040  | -1.0357910 | 0.0560500  |
| C | -8.4117110  | -2.3852950 | -0.3899090 |
| H | -9.4825480  | -2.5659460 | -0.2997530 |
| H | -8.1285710  | -2.5247320 | -1.4401190 |
| H | -7.8823950  | -3.1327180 | 0.2152190  |
| C | -9.1772820  | -0.2183420 | 0.6190460  |
| H | -9.0076860  | -0.0144370 | 1.6848050  |
| H | -9.2602300  | 0.7390220  | 0.0906270  |
| H | -10.1263190 | -0.7442410 | 0.5177340  |
| C | 2.0519100   | 0.3487630  | -0.0382890 |
| C | 3.0804450   | -0.6658170 | -0.0232380 |
| C | 2.4499190   | 1.6838800  | 0.0004550  |
| C | 3.8177680   | 2.0438590  | 0.0043030  |
| H | 1.6960370   | 2.4693190  | 0.0052310  |
| C | 4.8373780   | 1.0478580  | -0.0139840 |
| C | 5.1498410   | -1.4856270 | 0.0944190  |
| C | 4.1722330   | -2.5054350 | 0.0431150  |
| N | 4.4239430   | -0.2917180 | 0.0299970  |
| N | 2.9068410   | -1.9679690 | -0.0269620 |
| C | 6.5064980   | -1.8054770 | 0.2311340  |
| C | 6.8485770   | -3.1518680 | 0.2760810  |
| H | 7.2865210   | -1.0641570 | 0.3274840  |
| H | 7.8951100   | -3.4199890 | 0.3830790  |
| C | 4.5347700   | -3.8552050 | 0.0862650  |
| C | 5.8801480   | -4.1674260 | 0.1964070  |
| H | 3.7670820   | -4.6211340 | 0.0416120  |
| H | 6.1928700   | -5.2063760 | 0.2337160  |
| C | 4.2116650   | 3.4058460  | -0.0066370 |
| C | 5.5415030   | 3.7672890  | -0.0590030 |
| H | 3.4293010   | 4.1599060  | 0.0167980  |
| H | 5.8228920   | 4.8156730  | -0.0686160 |
| C | 6.1785230   | 1.4261020  | -0.0994750 |
| C | 6.5282490   | 2.7720860  | -0.1181940 |
| H | 6.9571390   | 0.6831060  | -0.1773480 |
| H | 7.5766440   | 3.0450800  | -0.1860630 |
| H | 0.8549320   | -2.0986050 | -0.1047490 |
| C | -3.1007090  | 3.3511850  | -0.1601500 |
| H | -3.9317780  | 3.1911220  | -0.8506990 |
| H | -3.4815180  | 3.7005210  | 0.8045190  |

H -2.4245270 4.1105330 -0.5559500

#### 4j (ground state)

|   |             |            |            |
|---|-------------|------------|------------|
| C | -2.8261210  | 1.0552400  | -0.1473410 |
| C | -1.0199950  | 2.5231590  | -0.1665920 |
| C | -0.5548920  | 1.1518840  | -0.1920640 |
| C | -1.6824860  | 0.2856580  | -0.2021100 |
| C | 0.5771810   | 0.3772780  | -0.1247220 |
| C | -1.1840320  | -1.0965130 | -0.1574100 |
| O | -1.7592630  | -2.1671620 | -0.1784970 |
| O | -0.4286410  | 3.5967700  | -0.1907090 |
| N | -2.4287730  | 2.4005420  | -0.1345440 |
| N | 0.2359840   | -0.9587680 | -0.1081130 |
| C | -4.2078730  | 0.6109750  | -0.0804430 |
| C | -5.2408490  | 1.3582740  | 0.5085310  |
| C | -4.5265240  | -0.6730700 | -0.5596100 |
| C | -6.5339470  | 0.8691290  | 0.5891920  |
| H | -5.0328360  | 2.3248820  | 0.9539950  |
| C | -5.8150200  | -1.1689500 | -0.4923870 |
| H | -3.7394420  | -1.2986210 | -0.9705700 |
| C | -6.8635220  | -0.4044840 | 0.0703000  |
| H | -7.2881170  | 1.4777230  | 1.0733010  |
| H | -6.0026640  | -2.1659490 | -0.8717200 |
| N | -8.1507220  | -0.8838630 | 0.1182090  |
| C | -8.4118880  | -2.2610240 | -0.2535060 |
| H | -9.4796530  | -2.4580410 | -0.1547650 |
| H | -8.1322560  | -2.4430200 | -1.2967870 |
| H | -7.8648770  | -2.9721040 | 0.3818580  |
| C | -9.1578020  | -0.1505750 | 0.8577570  |
| H | -8.9042230  | -0.0571660 | 1.9240100  |
| H | -9.2906540  | 0.8553250  | 0.4442150  |
| H | -10.1108560 | -0.6734460 | 0.7740280  |
| C | 1.9616680   | 0.7968760  | -0.0632930 |
| C | 2.9347050   | -0.2436510 | 0.0050560  |
| C | 2.4121910   | 2.0841790  | -0.0707780 |
| C | 3.8188520   | 2.3599440  | 0.0031840  |
| H | 1.7003660   | 2.9078390  | -0.1286190 |
| C | 4.7700840   | 1.3101350  | 0.0787830  |
| C | 4.9099100   | -1.2671350 | 0.1097010  |
| C | 3.8638040   | -2.2090770 | 0.0730490  |
| N | 4.2811990   | -0.0057420 | 0.0675810  |
| N | 2.6616310   | -1.5354620 | 0.0085230  |
| B | 1.1863140   | -2.1766170 | -0.0684450 |
| F | 1.1478500   | -2.9331990 | -1.2212690 |
| F | 1.0337410   | -2.9460460 | 1.0651070  |
| C | 6.2407510   | -1.6975140 | 0.1672970  |
| C | 6.4659840   | -3.0671150 | 0.1915140  |
| H | 7.0856610   | -1.0252080 | 0.1889720  |
| H | 7.4898940   | -3.4239910 | 0.2357630  |
| C | 4.0937080   | -3.5854810 | 0.0981030  |
| C | 5.4129330   | -3.9993420 | 0.1589700  |
| H | 3.2578970   | -4.2761360 | 0.0693060  |
| H | 5.6417800   | -5.0598170 | 0.1803440  |
| C | 4.2837260   | 3.6909520  | 0.0080710  |
| C | 5.6316470   | 3.9771830  | 0.0878200  |
| H | 3.5478990   | 4.4880510  | -0.0508970 |
| H | 5.9738210   | 5.0067290  | 0.0910110  |
| C | 6.1349600   | 1.6063220  | 0.1645300  |
| C | 6.5558570   | 2.9266520  | 0.1682660  |
| H | 6.8696760   | 0.8194120  | 0.2335760  |
| H | 7.6177690   | 3.1408250  | 0.2361460  |
| C | -3.2524080  | 3.5770250  | -0.3413900 |

|   |            |           |            |
|---|------------|-----------|------------|
| H | -4.0883930 | 3.3379380 | -1.0018970 |
| H | -3.6331420 | 3.9796220 | 0.6024960  |
| H | -2.6191500 | 4.3360240 | -0.8048960 |



#### 4j (excited state)

|   |             |            |            |
|---|-------------|------------|------------|
| C | -2.8593460  | 1.0975140  | -0.1154010 |
| C | -1.0298790  | 2.5444150  | -0.1359700 |
| C | -0.5680290  | 1.1771890  | -0.1330720 |
| C | -1.6731990  | 0.3267340  | -0.1405140 |
| C | 0.6071280   | 0.3779660  | -0.0727040 |
| C | -1.1667300  | -1.0618550 | -0.0775200 |
| O | -1.7473570  | -2.1258190 | -0.0654820 |
| O | -0.4662330  | 3.6309720  | -0.1695020 |
| N | -2.4570410  | 2.4163050  | -0.1201820 |
| N | 0.2527990   | -0.9333710 | -0.0444690 |
| C | -4.2164980  | 0.6257220  | -0.0574290 |
| C | -5.2959700  | 1.3861940  | 0.4443400  |
| C | -4.4981970  | -0.6975150 | -0.4714390 |
| C | -6.5759160  | 0.8737470  | 0.5083070  |
| H | -5.1280780  | 2.3816560  | 0.8377490  |
| C | -5.7732780  | -1.2162800 | -0.4206140 |
| H | -3.6893990  | -1.3275870 | -0.8277560 |
| C | -6.8595220  | -0.4431460 | 0.0633600  |
| H | -7.3618270  | 1.4925570  | 0.9243010  |
| H | -5.9291750  | -2.2350750 | -0.7537590 |
| N | -8.1261040  | -0.9498860 | 0.1092480  |
| C | -8.3722770  | -2.3227260 | -0.2927390 |
| H | -9.4347450  | -2.5390230 | -0.1849440 |
| H | -8.0947940  | -2.4837840 | -1.3412190 |
| H | -7.8101240  | -3.0306940 | 0.3293530  |
| C | -9.2096100  | -0.1505370 | 0.6480200  |
| H | -9.0409640  | 0.1000290  | 1.7036650  |
| H | -9.3312490  | 0.7817920  | 0.0836640  |
| H | -10.1387570 | -0.7149230 | 0.5742690  |
| C | 1.9720140   | 0.7819600  | -0.0421590 |
| C | 2.9298730   | -0.2513200 | 0.0160510  |
| C | 2.4283140   | 2.1003350  | -0.0750540 |
| C | 3.8188410   | 2.3639110  | -0.0195990 |
| H | 1.7153690   | 2.9209520  | -0.1304820 |
| C | 4.7763550   | 1.3041040  | 0.0607460  |
| C | 4.9119680   | -1.2766040 | 0.0600200  |
| C | 3.8699750   | -2.2261280 | 0.0600910  |
| N | 4.2802420   | -0.0183630 | 0.0433710  |
| N | 2.6616450   | -1.5539080 | 0.0320870  |
| B | 1.2087120   | -2.1763090 | -0.0020700 |
| F | 1.0857570   | -2.9404500 | -1.1435460 |
| F | 1.0211310   | -2.9153230 | 1.1458970  |
| C | 6.2435690   | -1.7016120 | 0.0525660  |
| C | 6.4802600   | -3.0733740 | 0.0652040  |
| H | 7.0835490   | -1.0237310 | 0.0236850  |
| H | 7.5078040   | -3.4226370 | 0.0594200  |
| C | 4.1089240   | -3.5976280 | 0.0738900  |
| C | 5.4350860   | -4.0082550 | 0.0801790  |
| H | 3.2789080   | -4.2958860 | 0.0747040  |
| H | 5.6674230   | -5.0682380 | 0.0905730  |
| C | 4.3114160   | 3.6941790  | -0.0220890 |
| C | 5.6618330   | 3.9636050  | 0.0655480  |
| H | 3.5873320   | 4.5014970  | -0.0887270 |
| H | 6.0120100   | 4.9911670  | 0.0632240  |
| C | 6.1353700   | 1.5892810  | 0.1663150  |
| C | 6.5789310   | 2.9094560  | 0.1673610  |
| H | 6.8594850   | 0.7952800  | 0.2635660  |
| H | 7.6416430   | 3.1118990  | 0.2510570  |
| C | -3.2702510  | 3.6023380  | -0.3105710 |

|   |            |           |            |
|---|------------|-----------|------------|
| H | -4.0936670 | 3.3851060 | -0.9945940 |
| H | -3.6649020 | 3.9787400 | 0.6381420  |
| H | -2.6203920 | 4.3677370 | -0.7379560 |

## Section S8: Photostability measurements

Photostability was determined through the variation in absorption of each sample at the appropriate absorption maximum wavelength ( $\lambda_{\text{abs}}$ ) with respect to irradiation time. Methanol was selected as the solvent in all cases as this is closest solvent to aqueous media (important for biological imaging) that these compounds are soluble in. Concentrations giving similar optical densities ( $A \approx 1$ ) were used. Quartz cuvettes of samples were irradiated with a 300 W Xe lamp (Asahi spectra, MAX-350) equipped with a UV/vis mirror module through a glass fiber. The absorption spectra were measured at appropriate times during the irradiation. BODIPY (Difluoro{2-[1-(3,5-dimethyl-2*H*-pyrrol-2-ylidene-*N*)ethyl]-3,5-dimethyl-1*H*-pyrrolato-*N*}boron) and DPP (2,5-dibutyl-3,6-bis(3,5-dimethoxyphenyl)pyrrolo[3,4-*c*]pyrrole-1,4(2*H*,5*H*)-dione) were used as references.

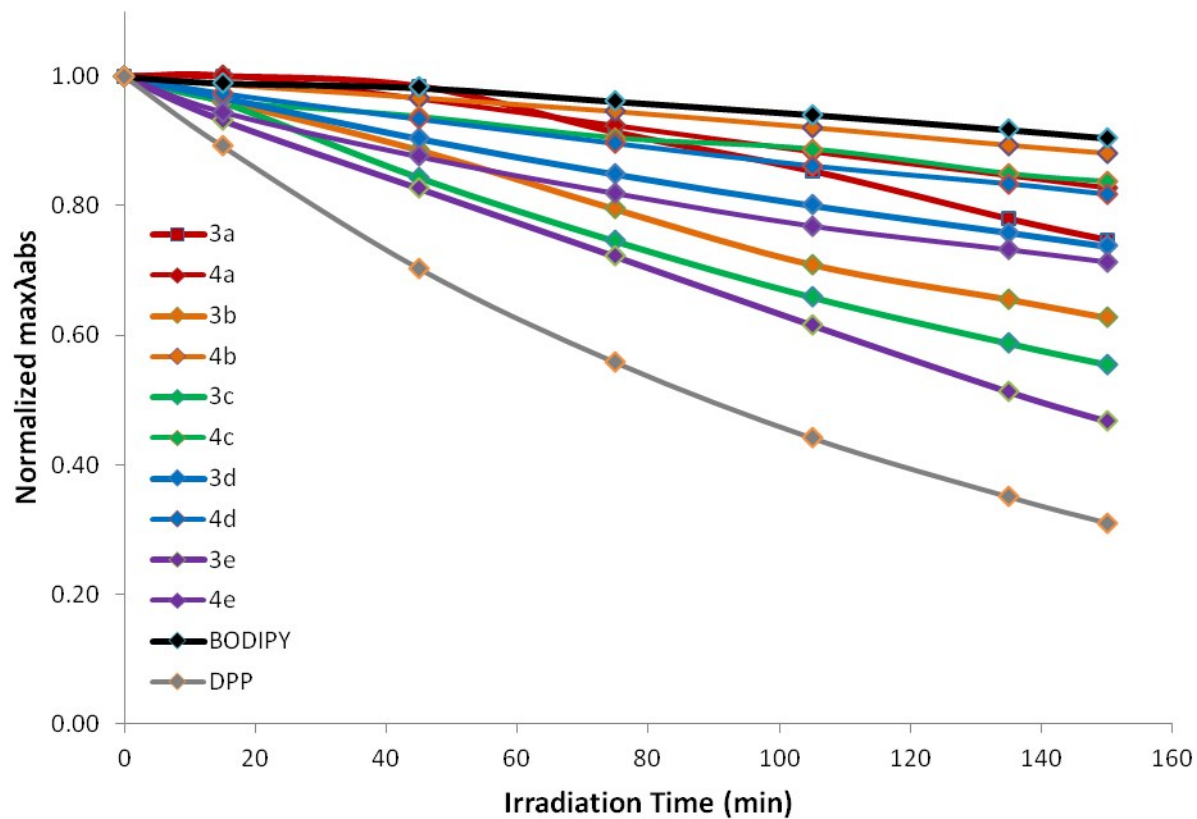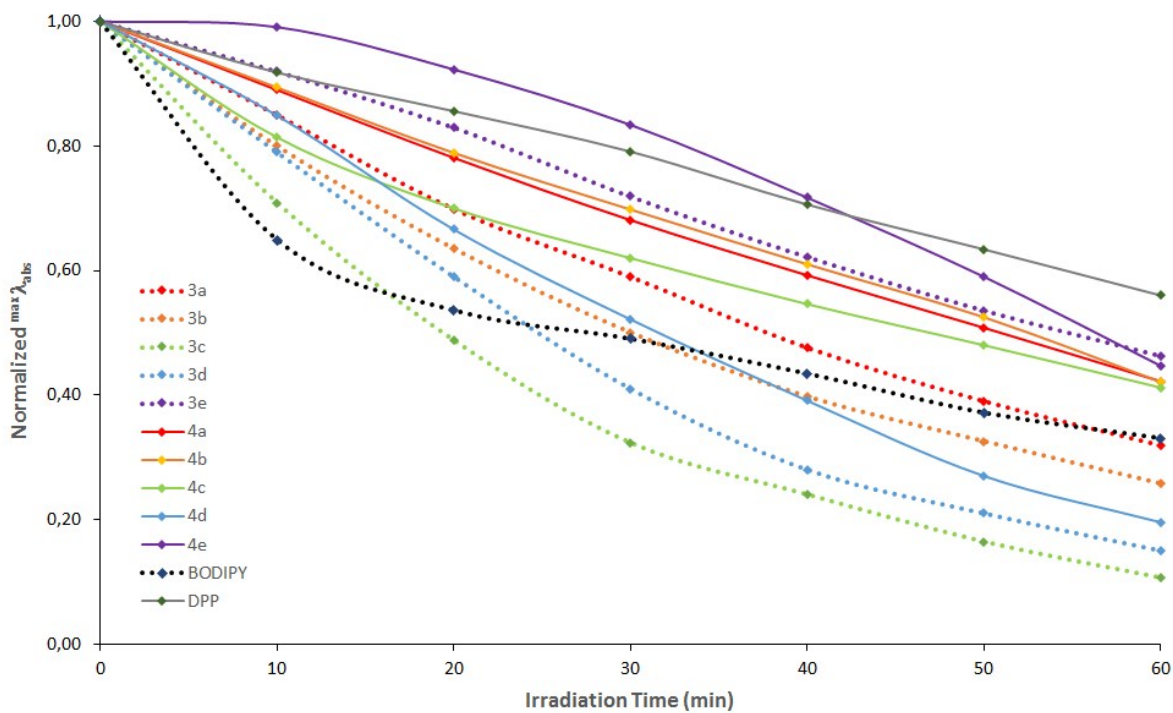

Figure 36. Photostability of free base DPPs **3a-3e** (dashed lines), DPP-BF<sub>2</sub> hybrids **4a-4e** (solid lines) and reference standards in MeOH (top) and DMF (bottom).



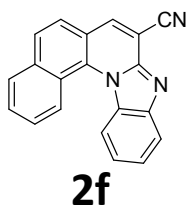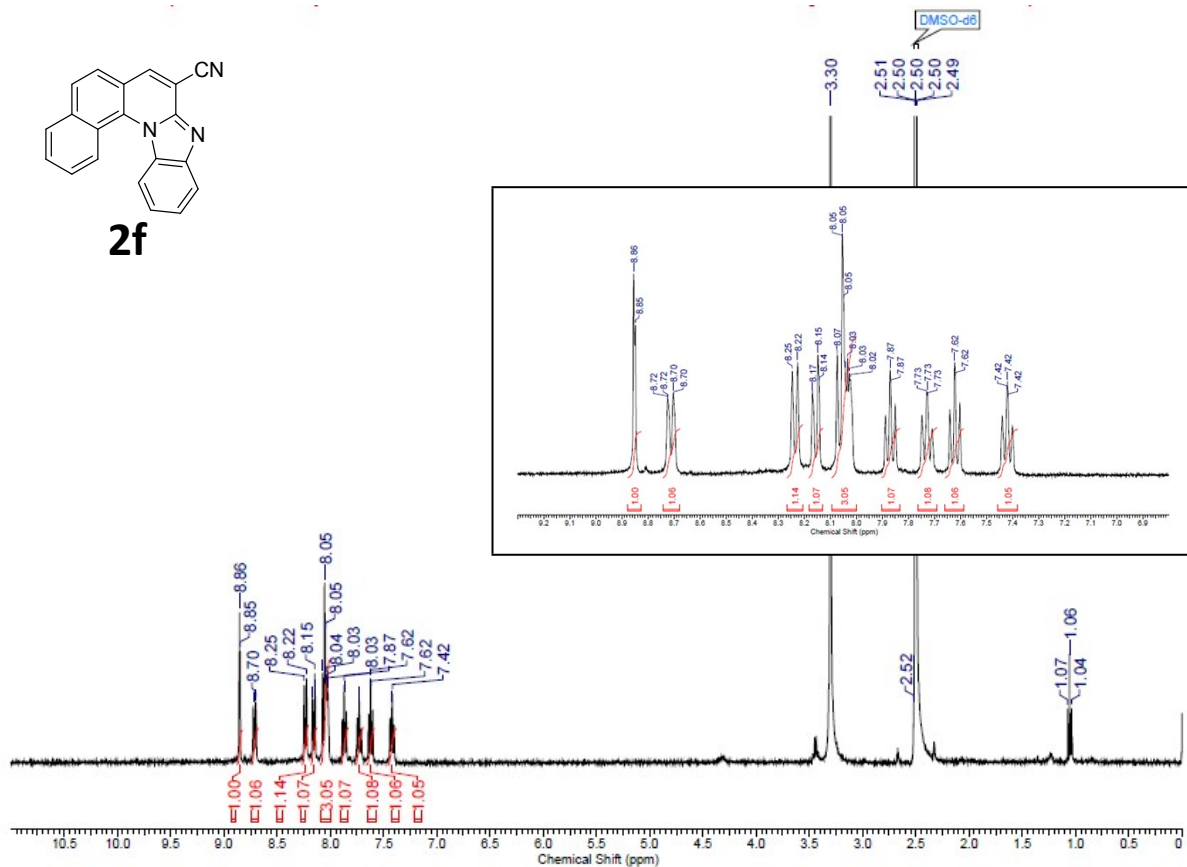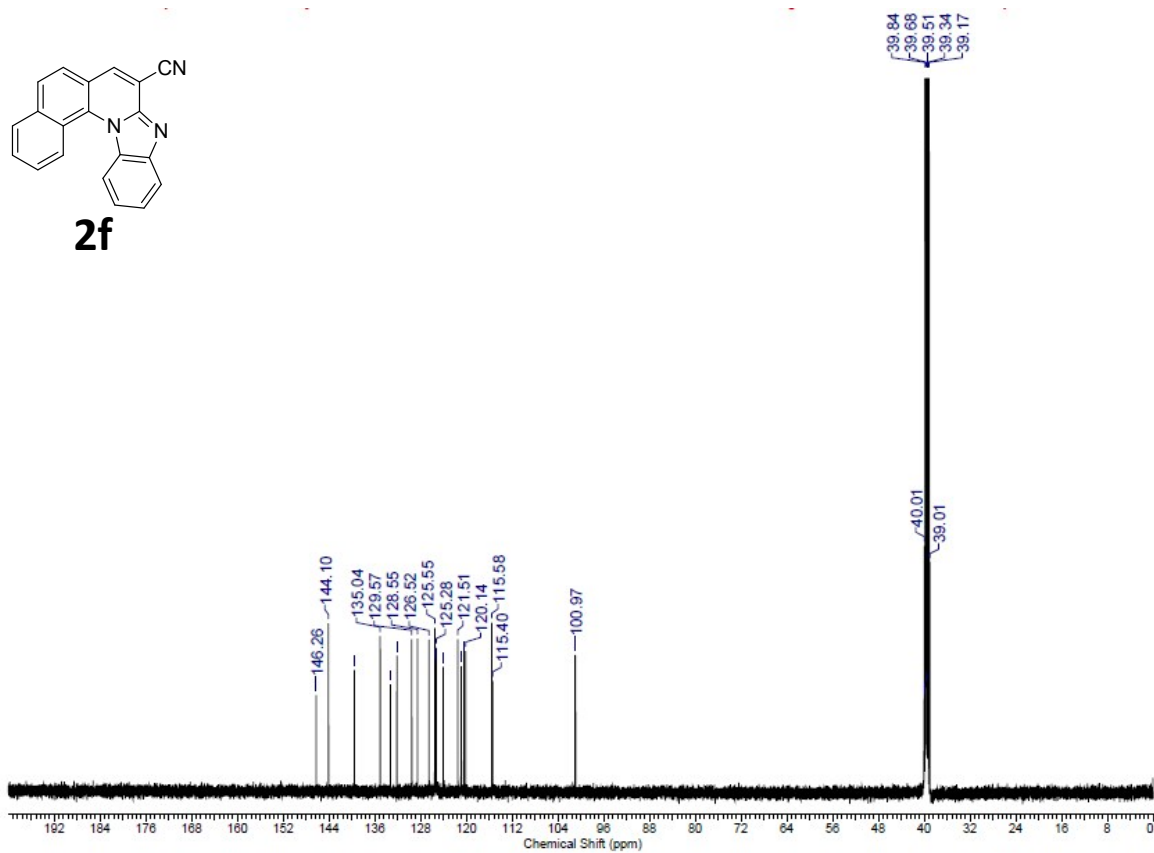

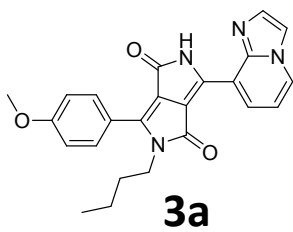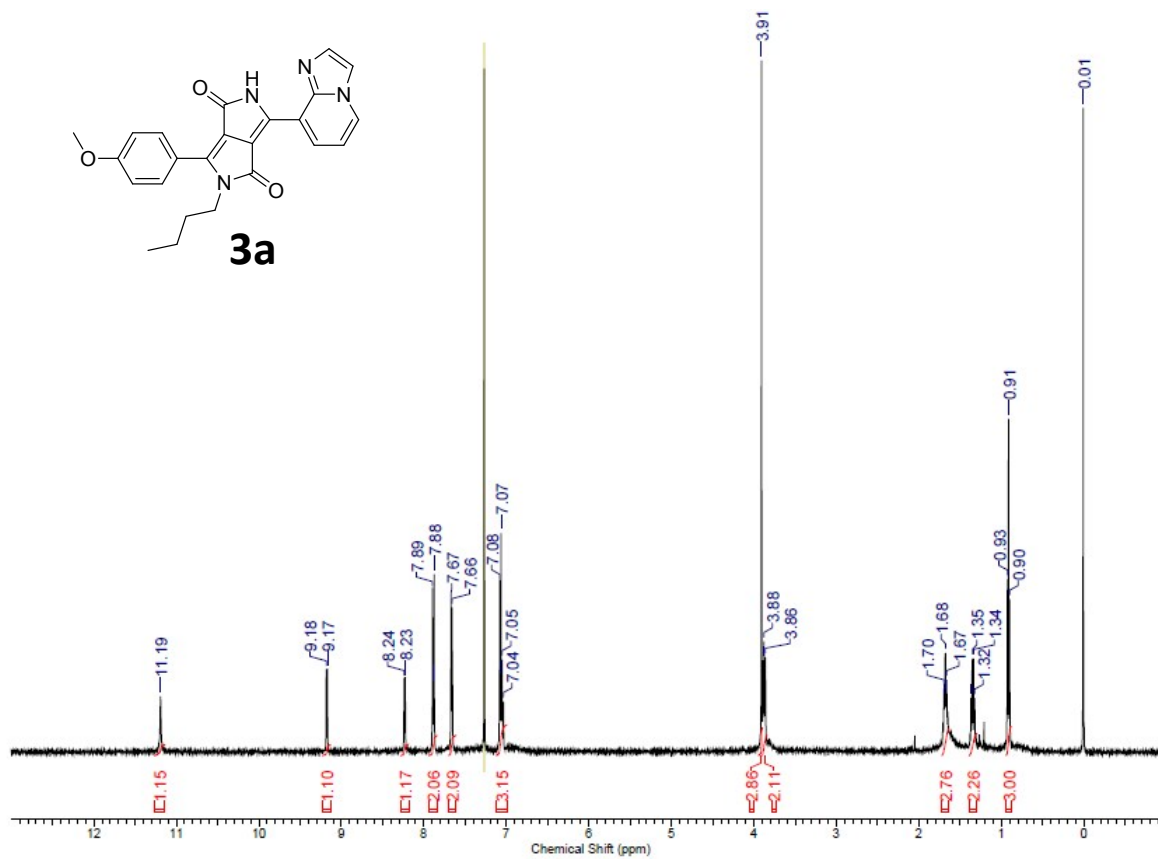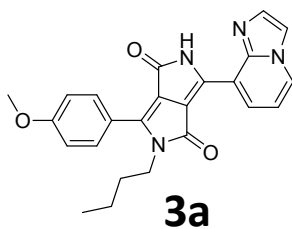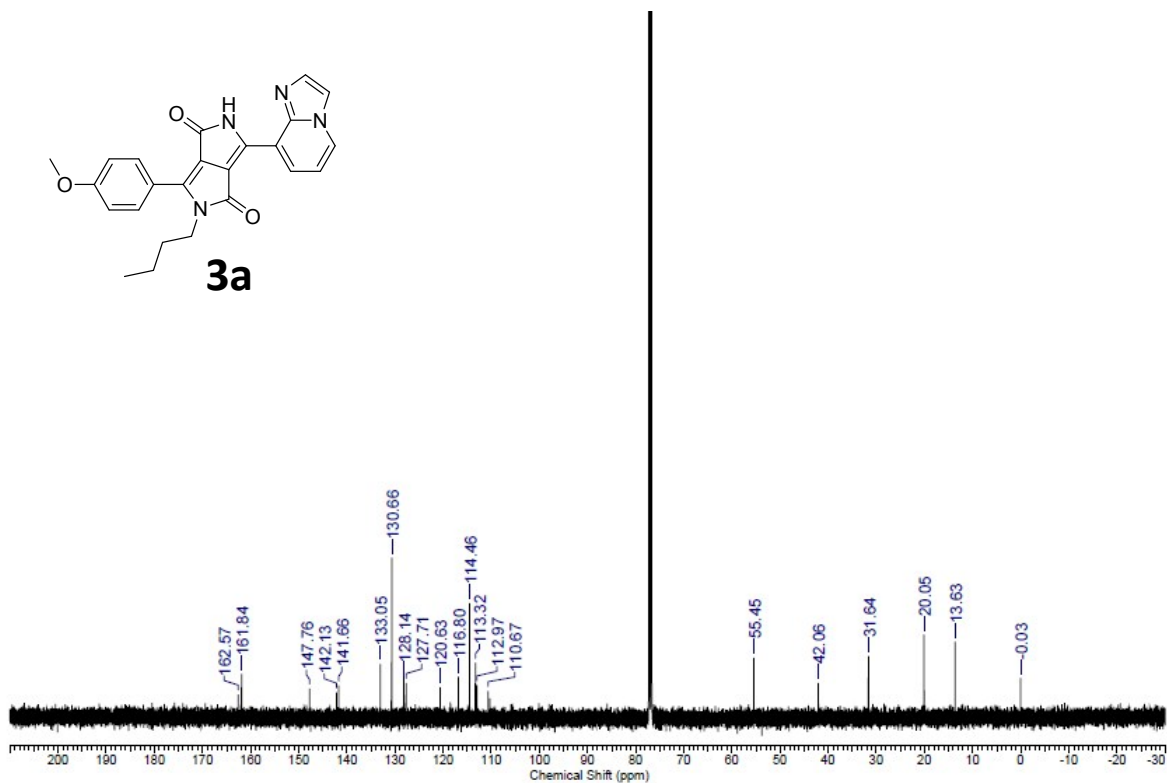

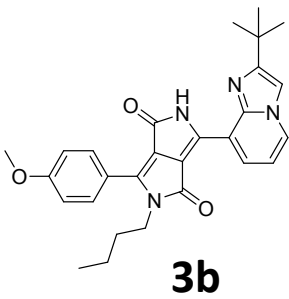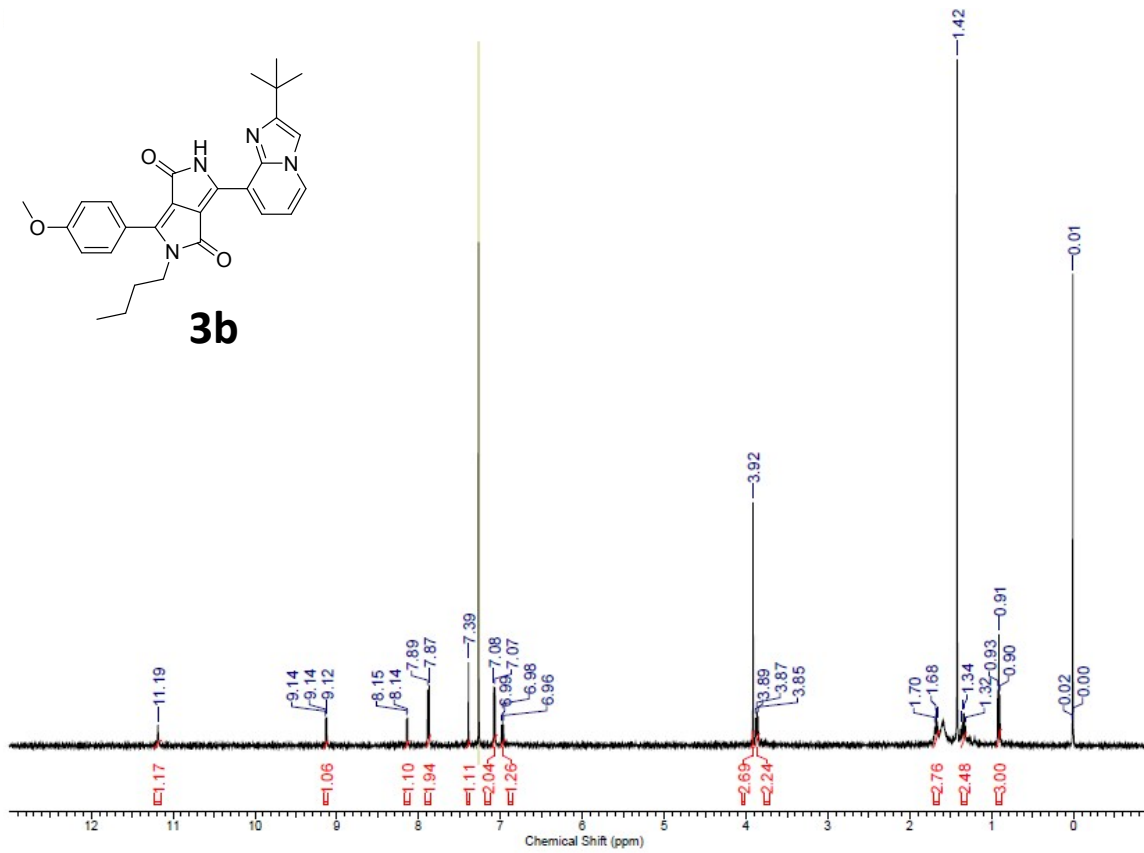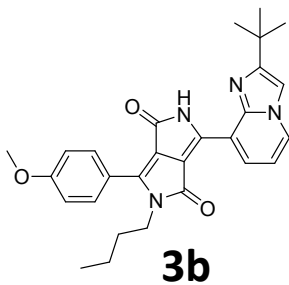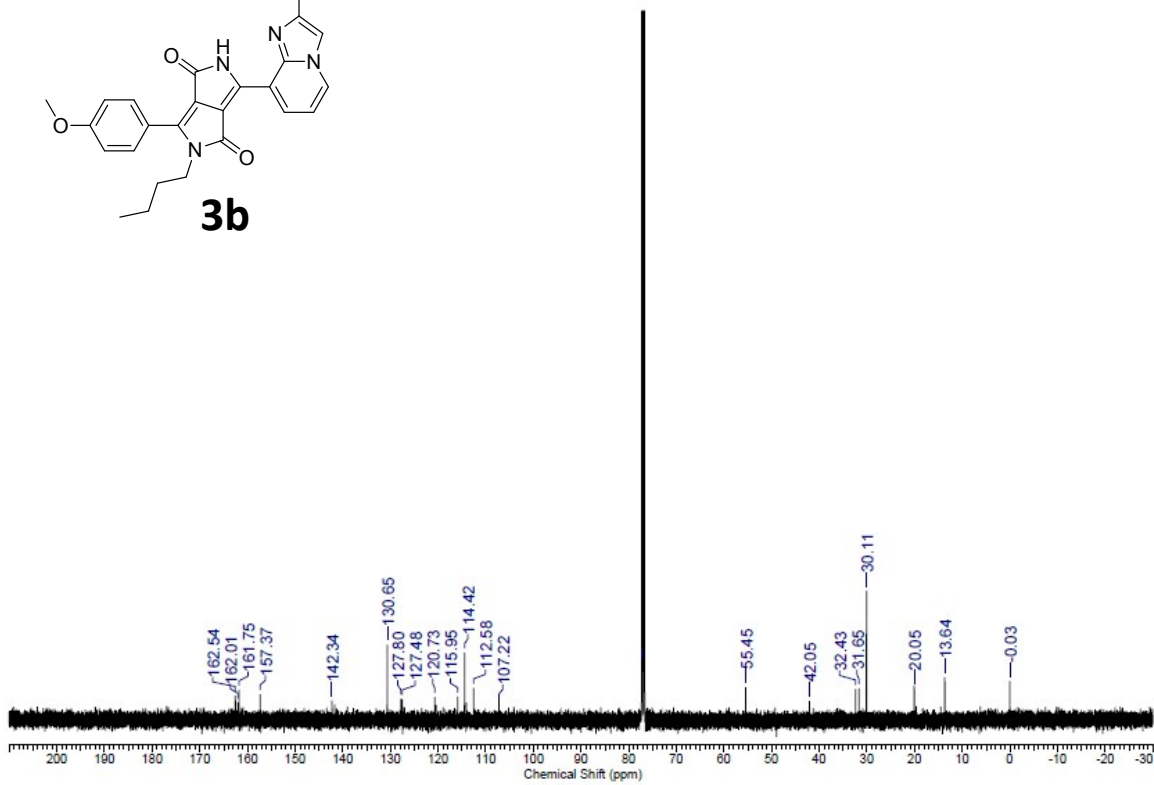



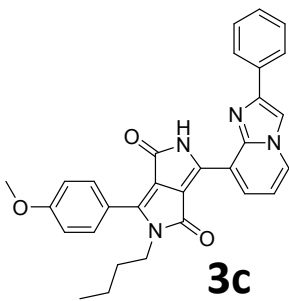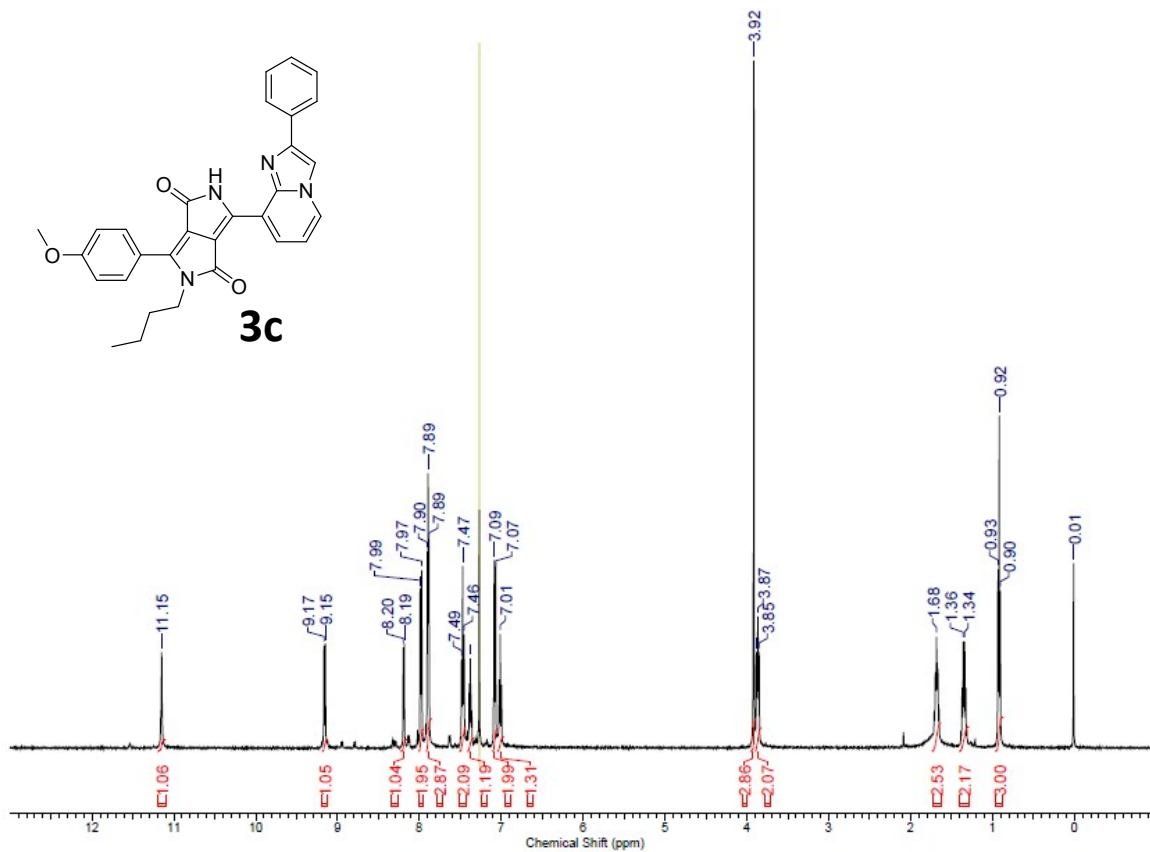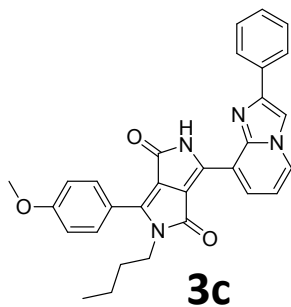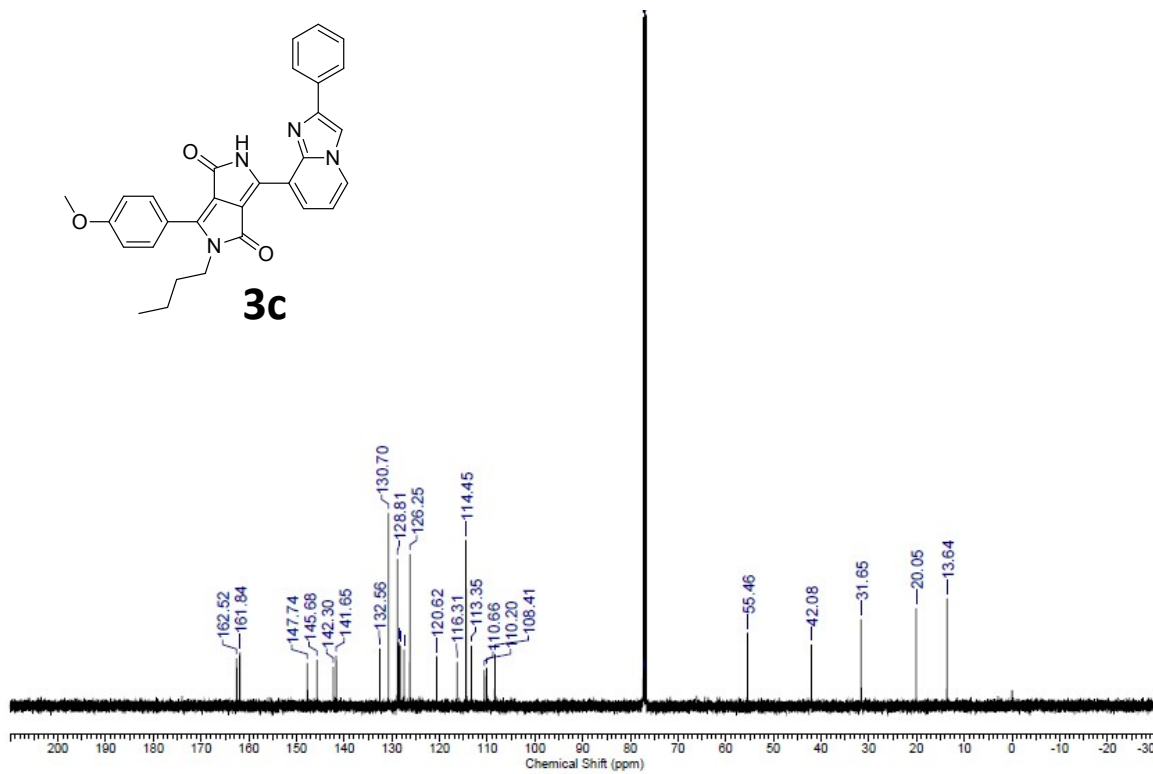

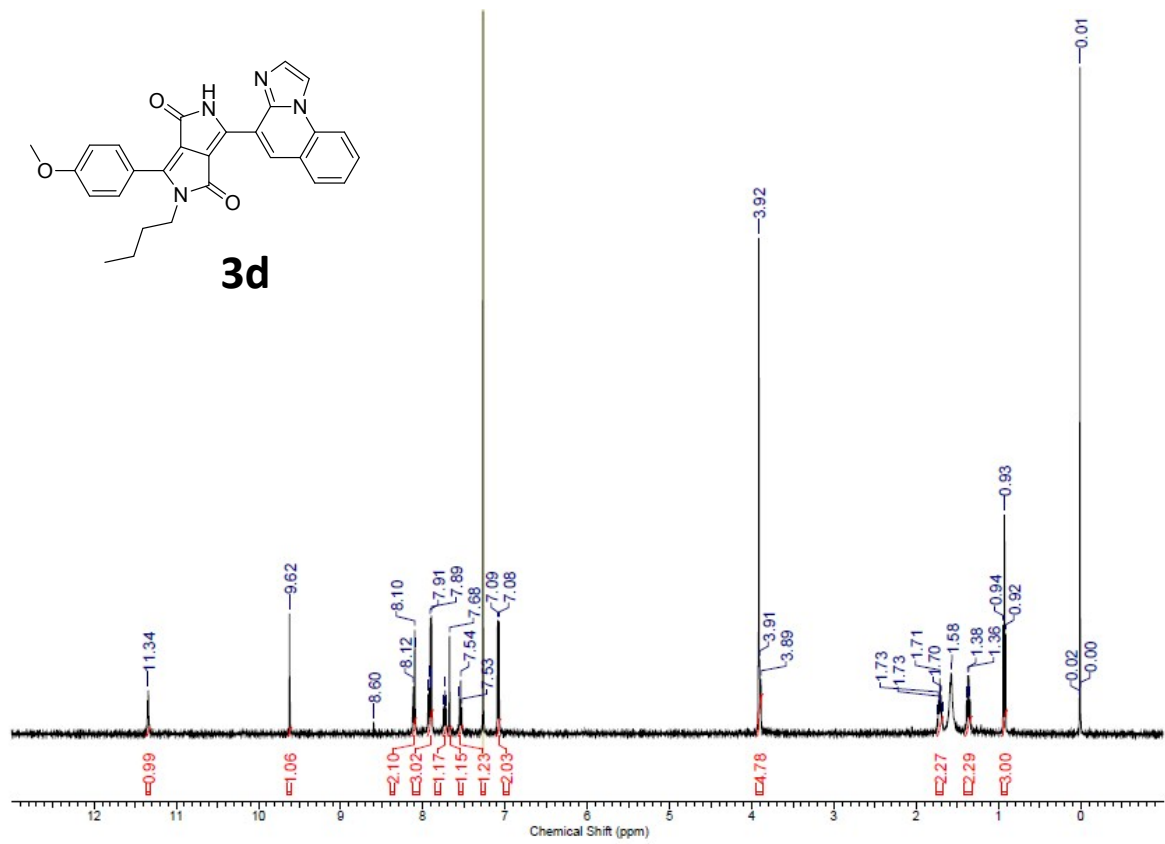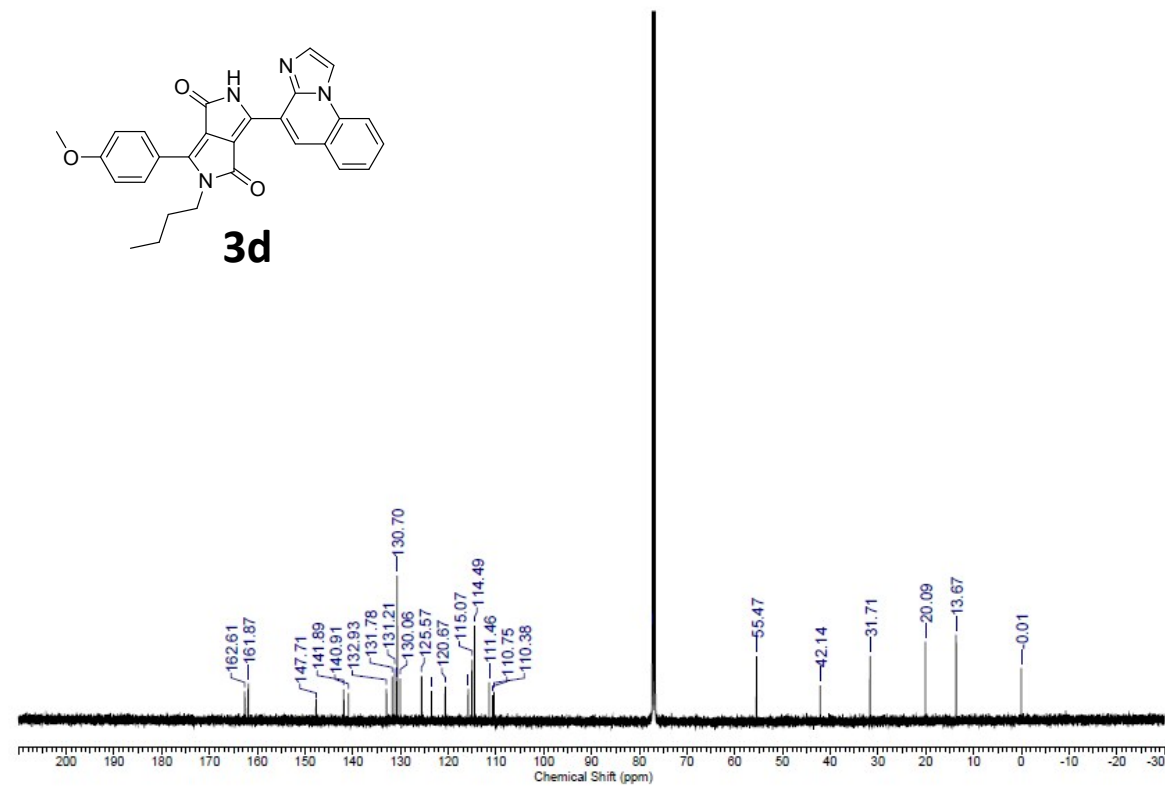

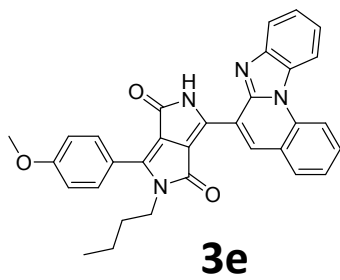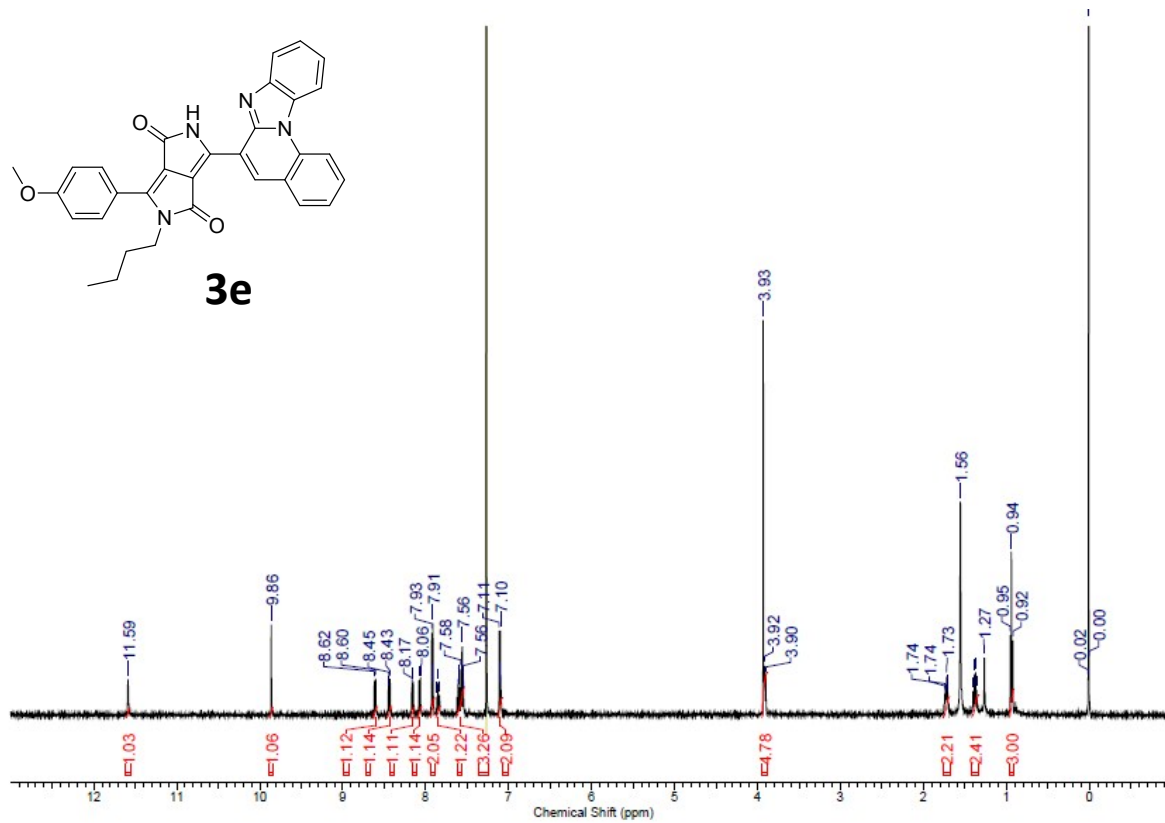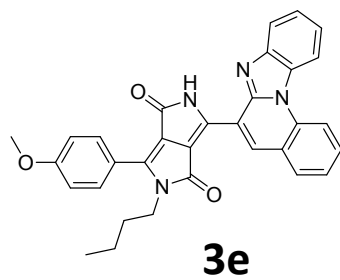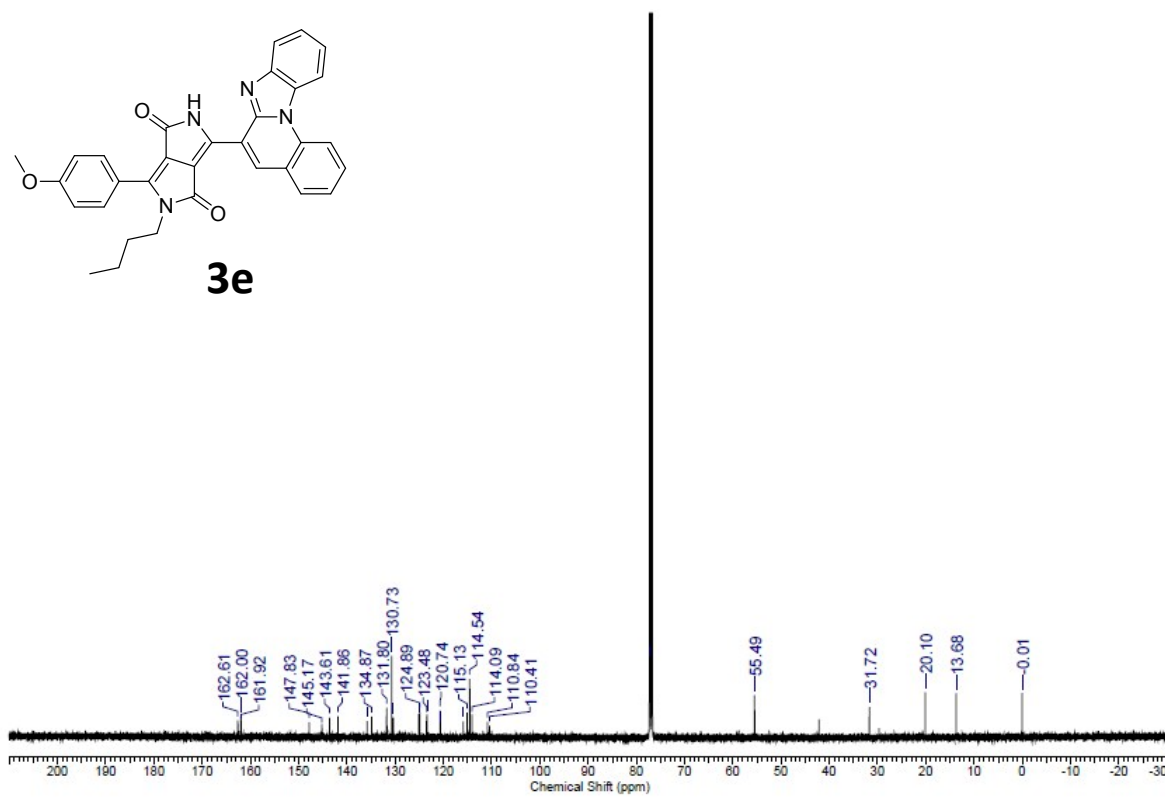

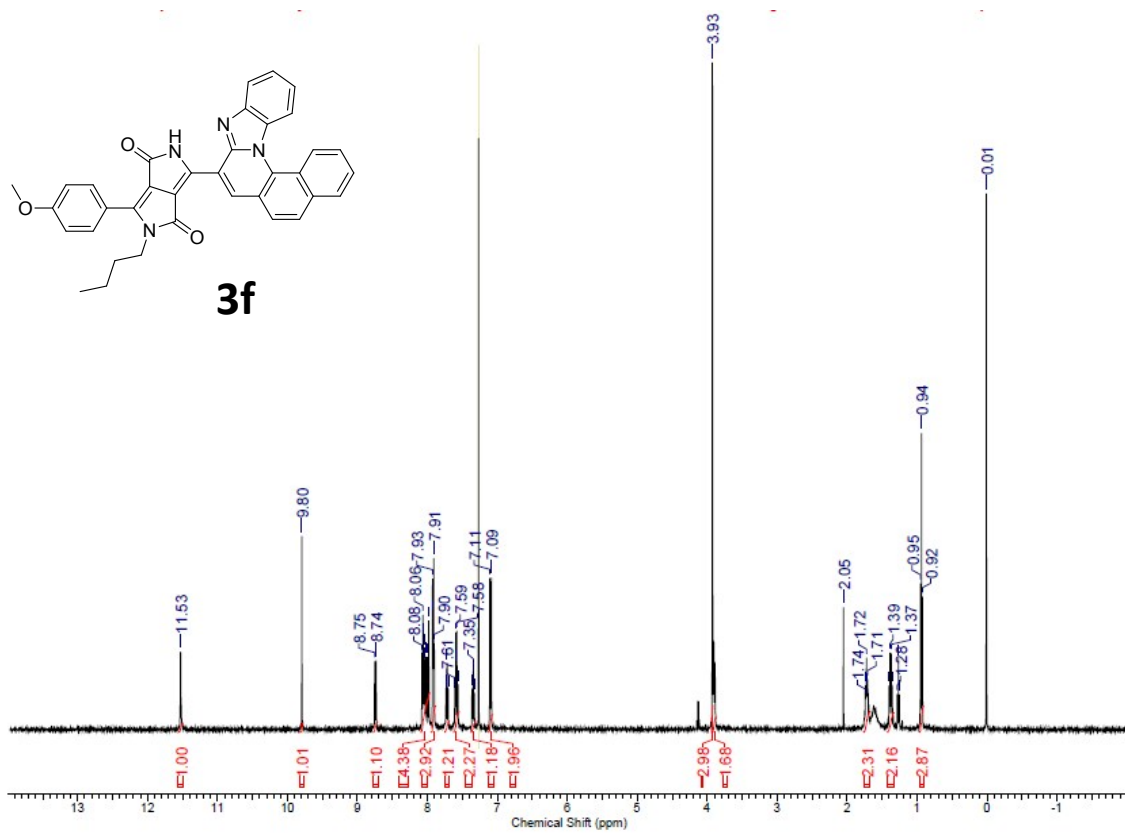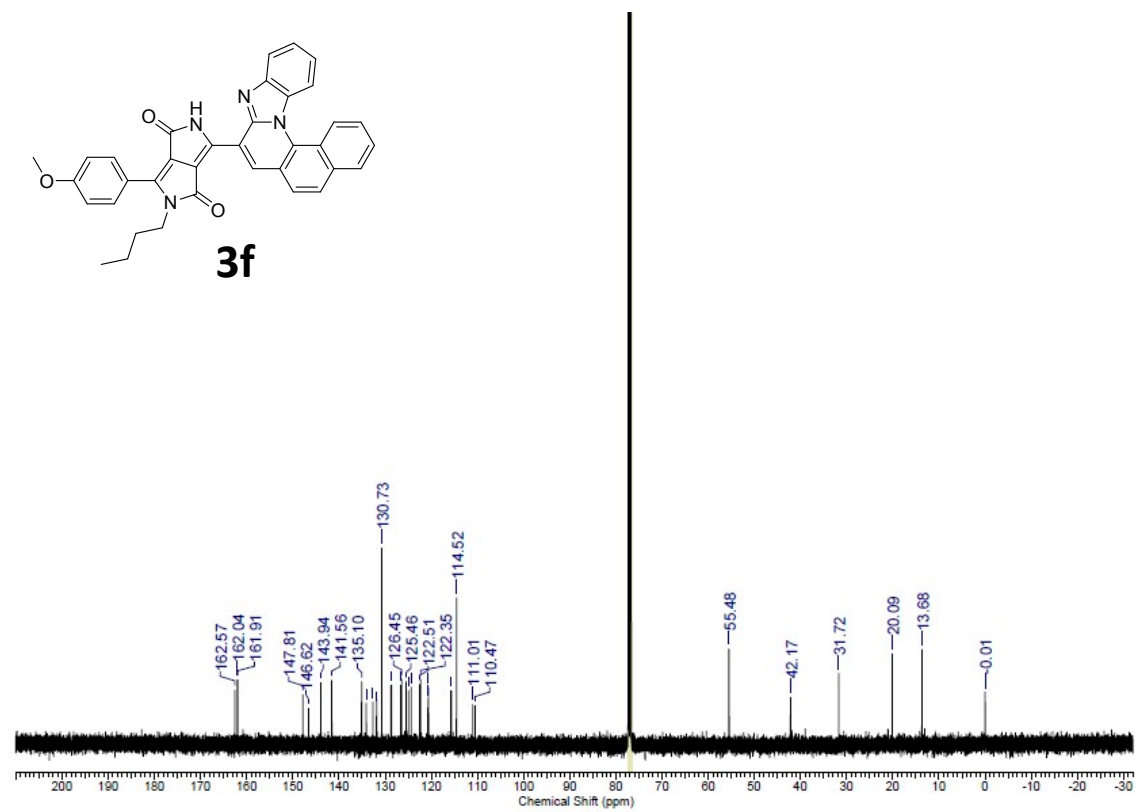

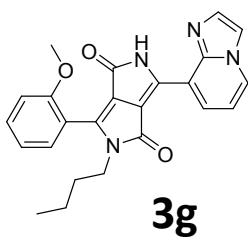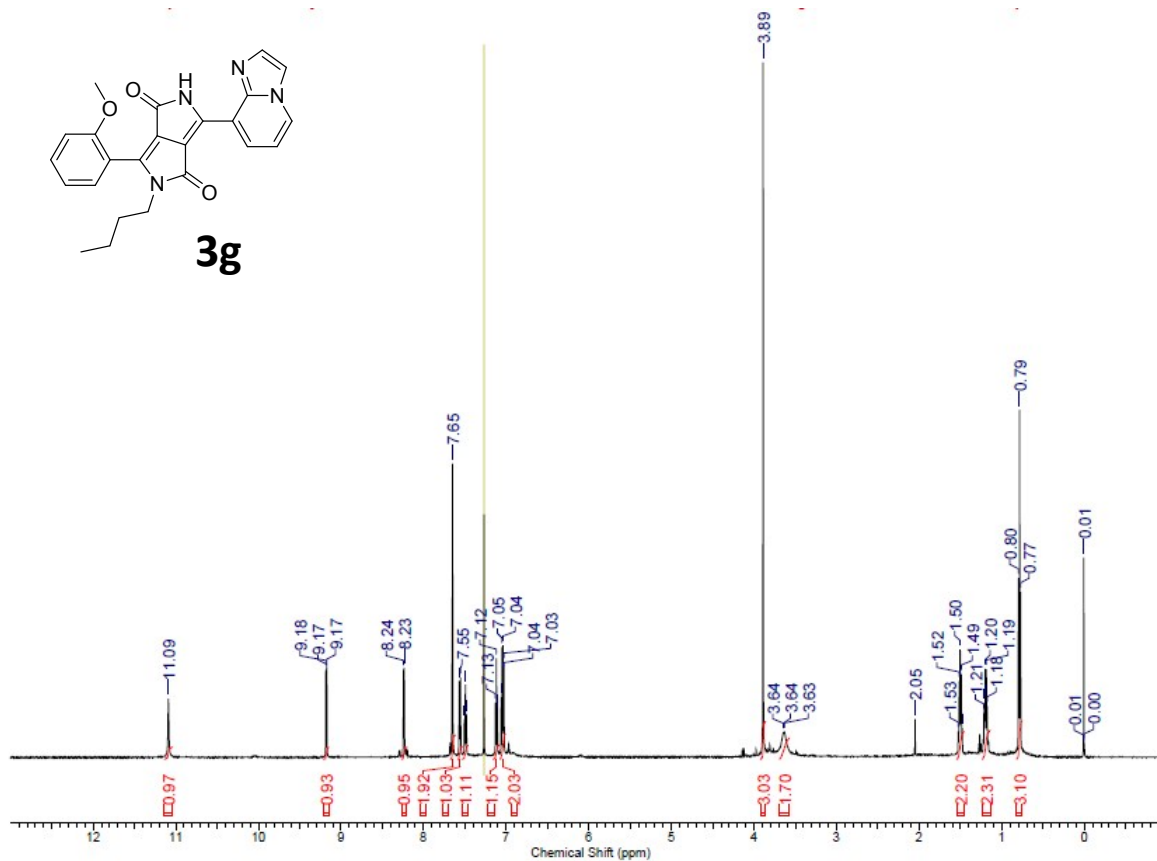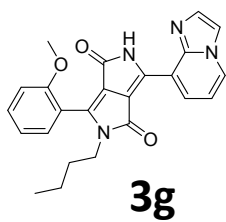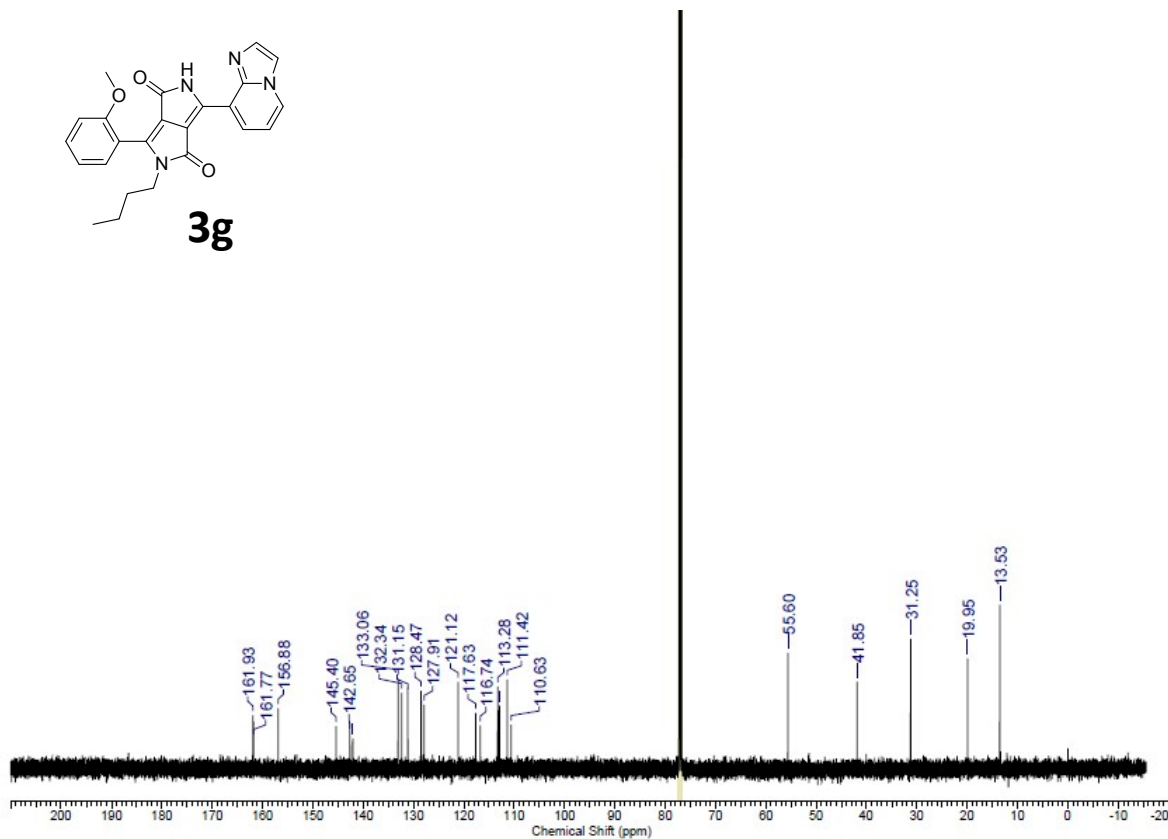

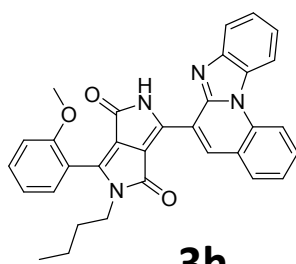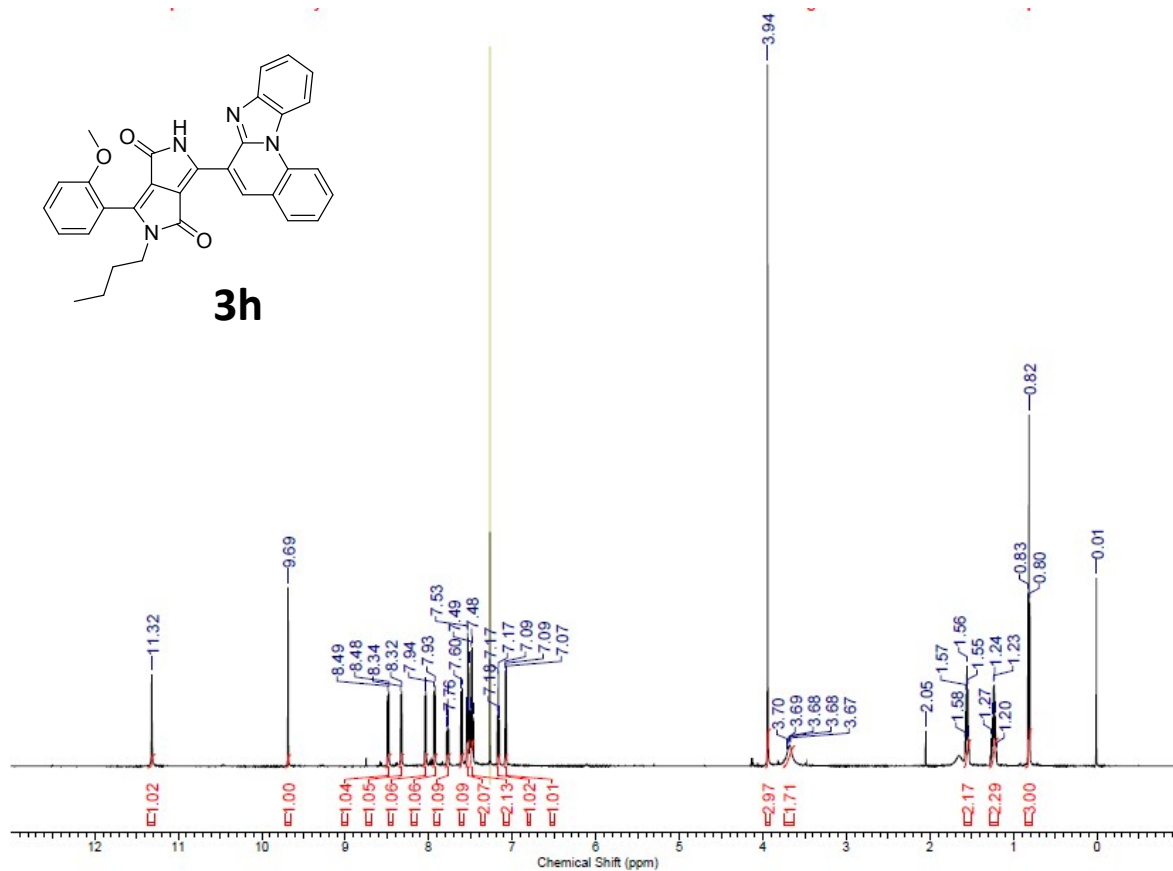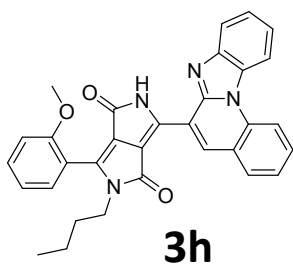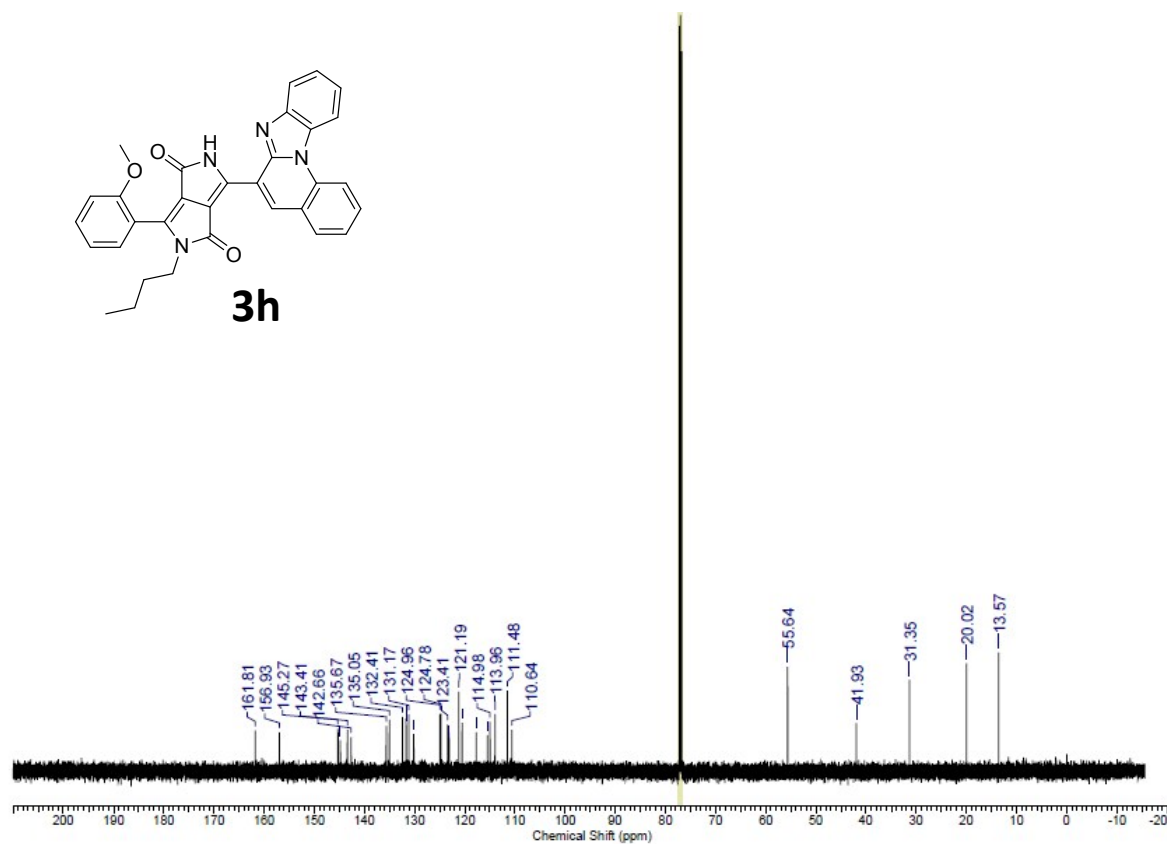

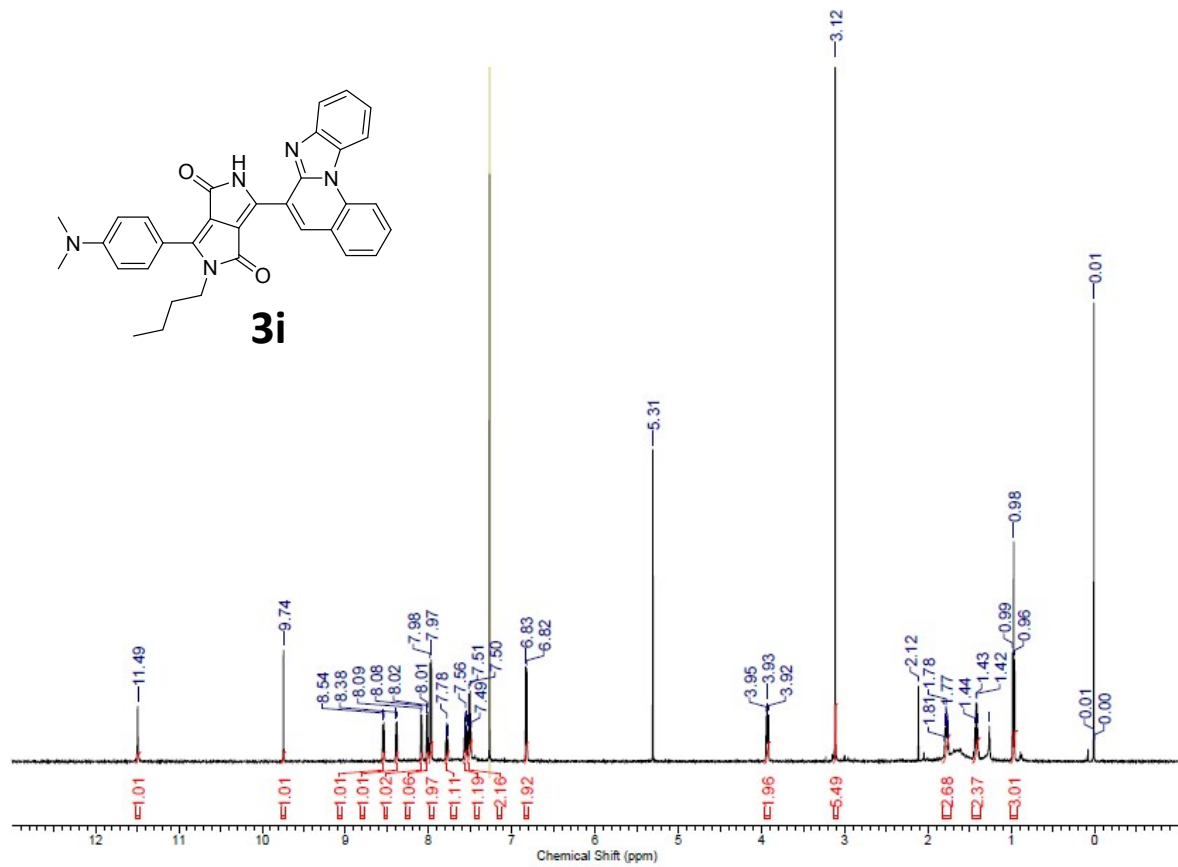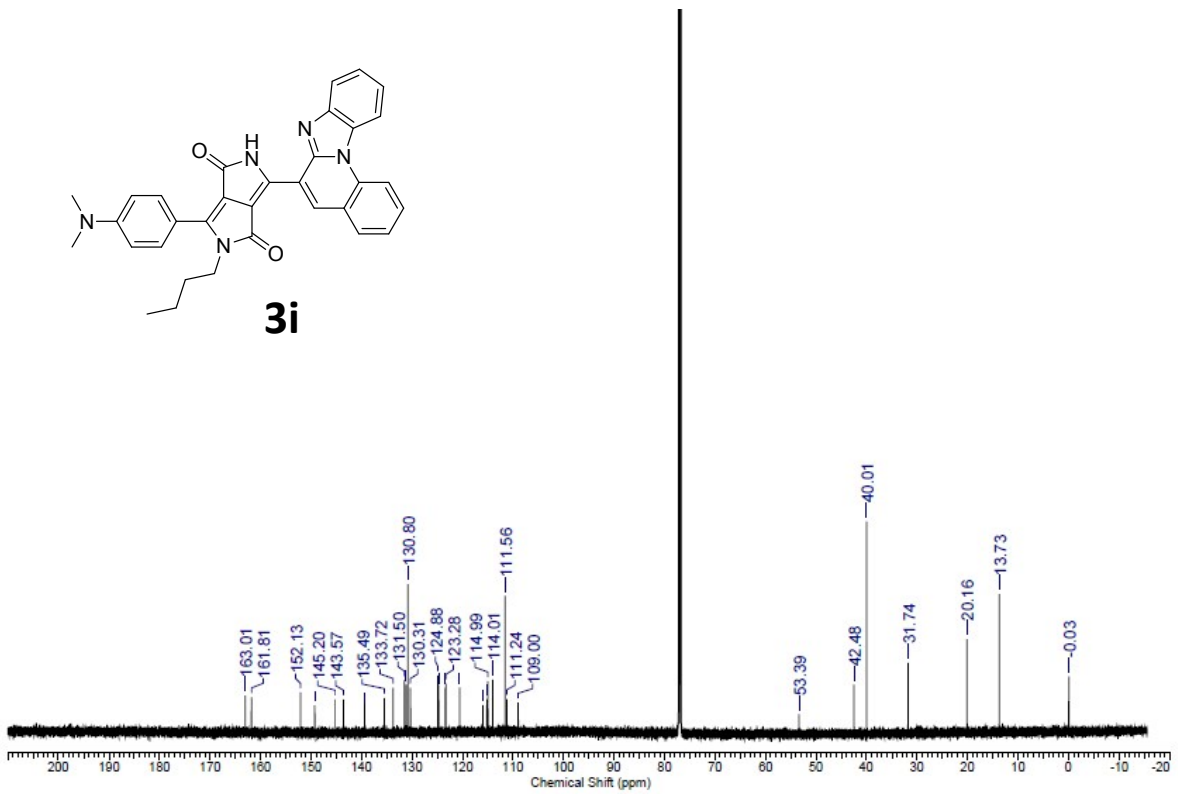

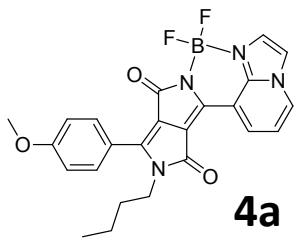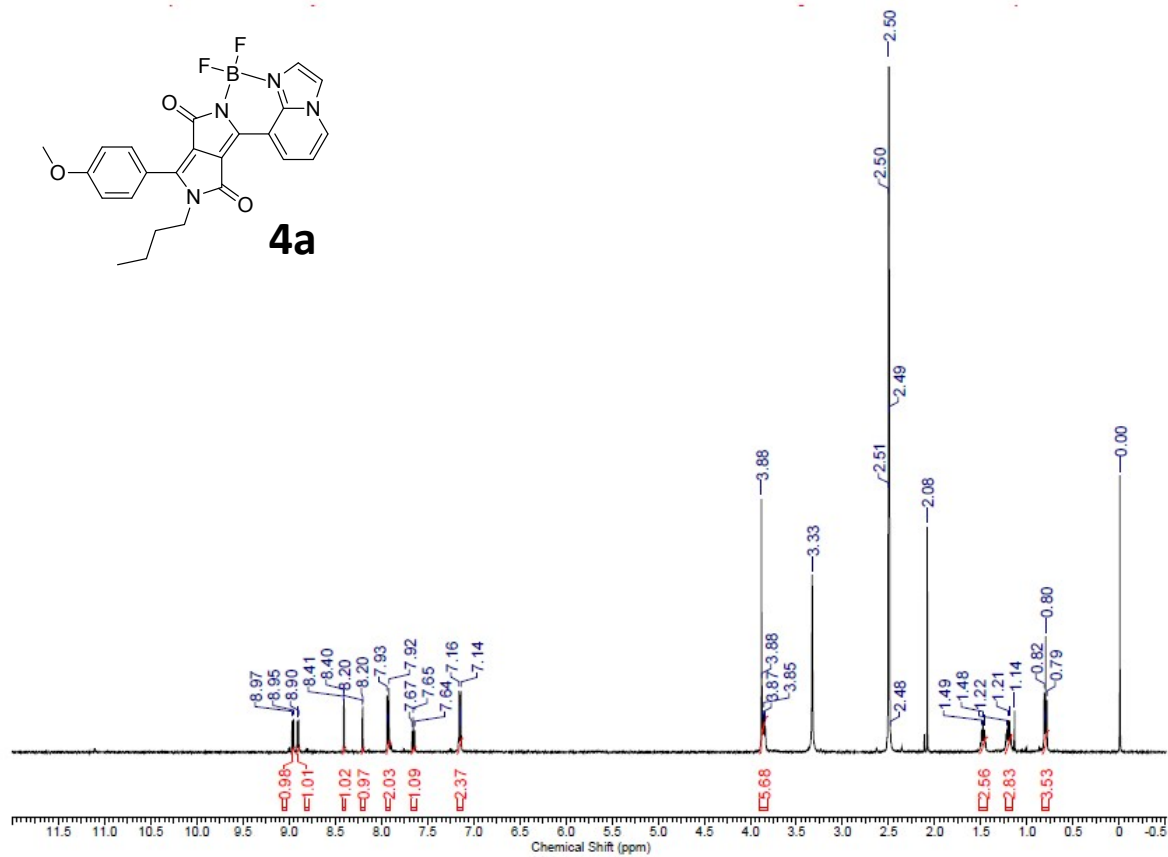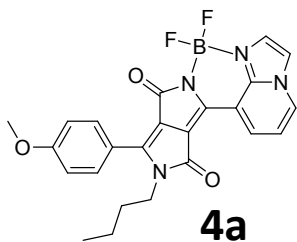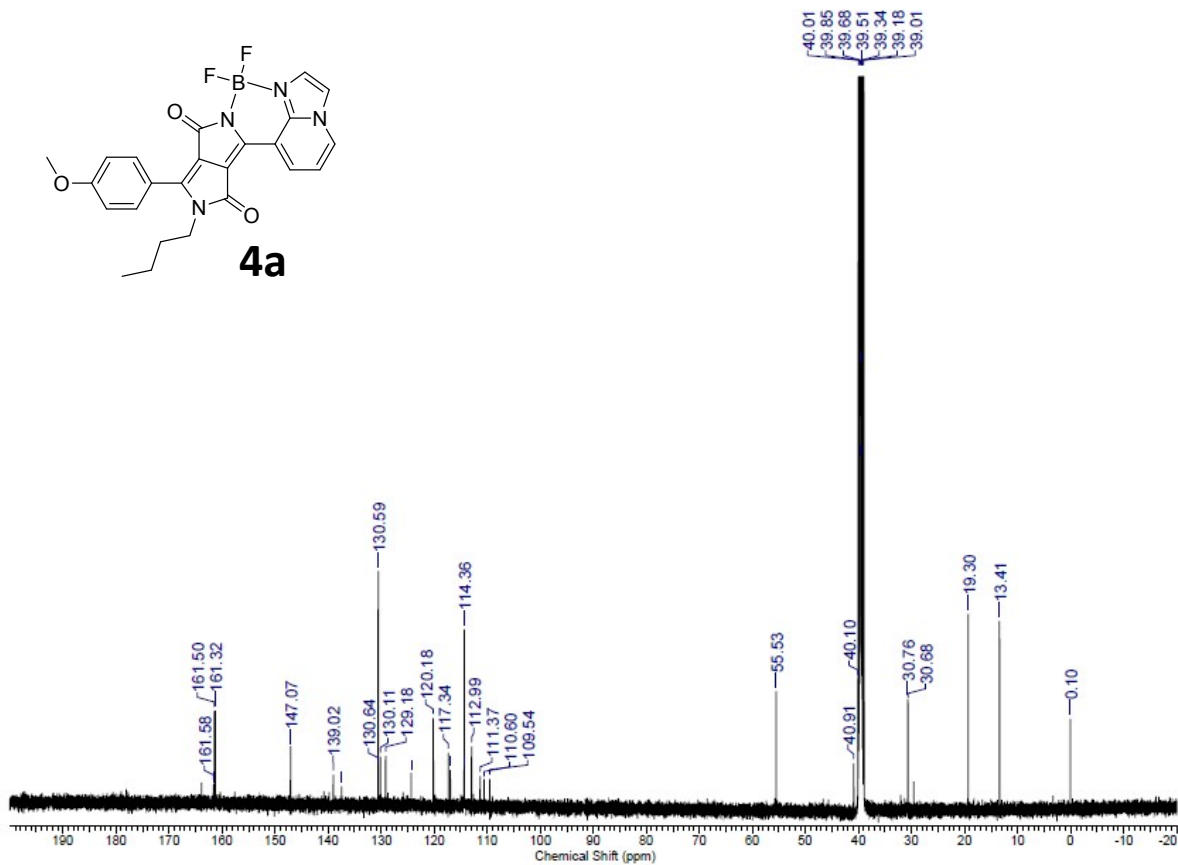



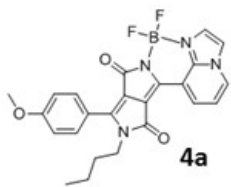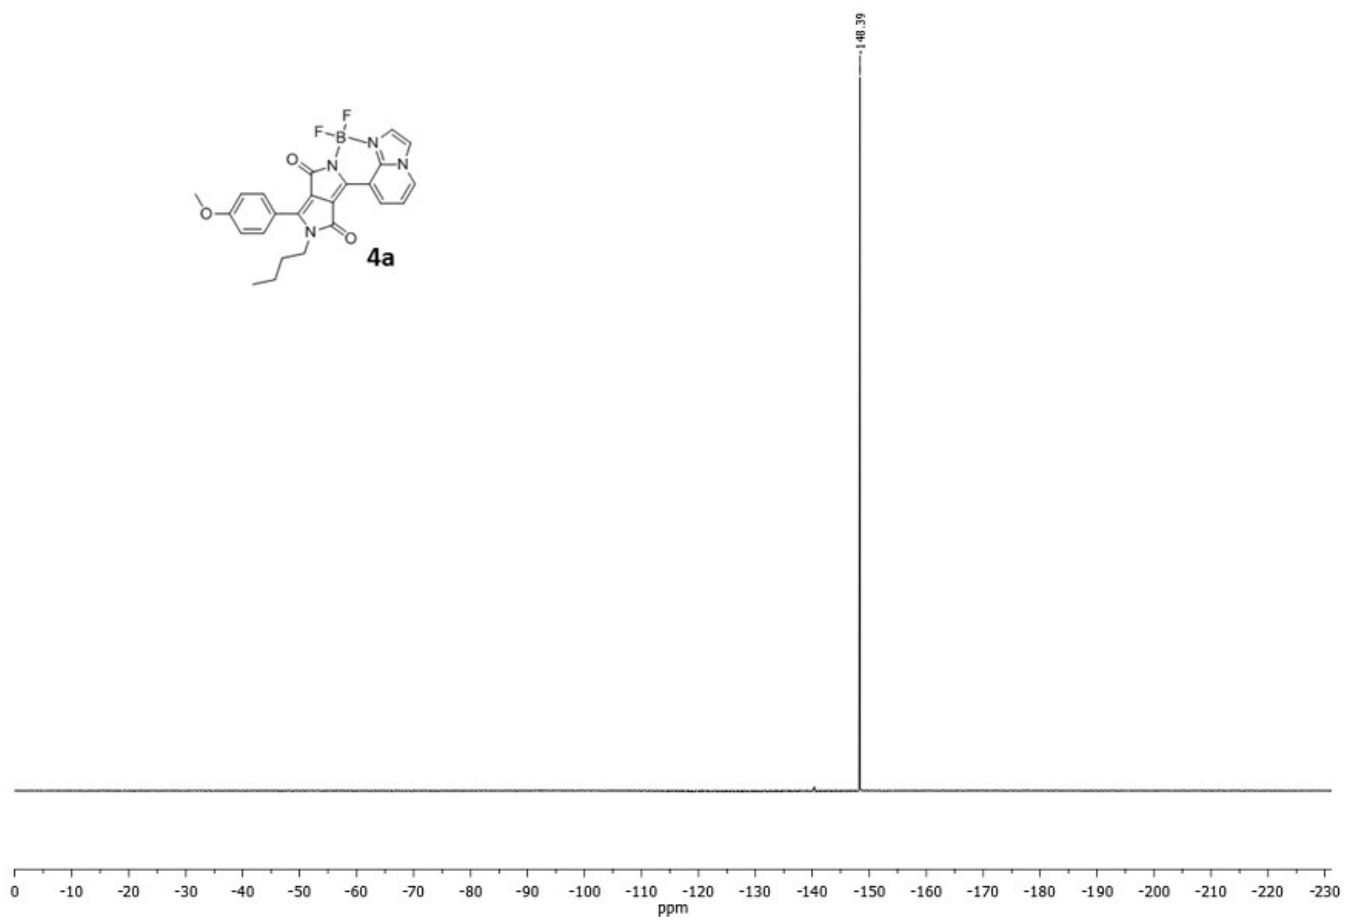

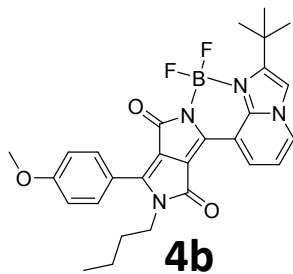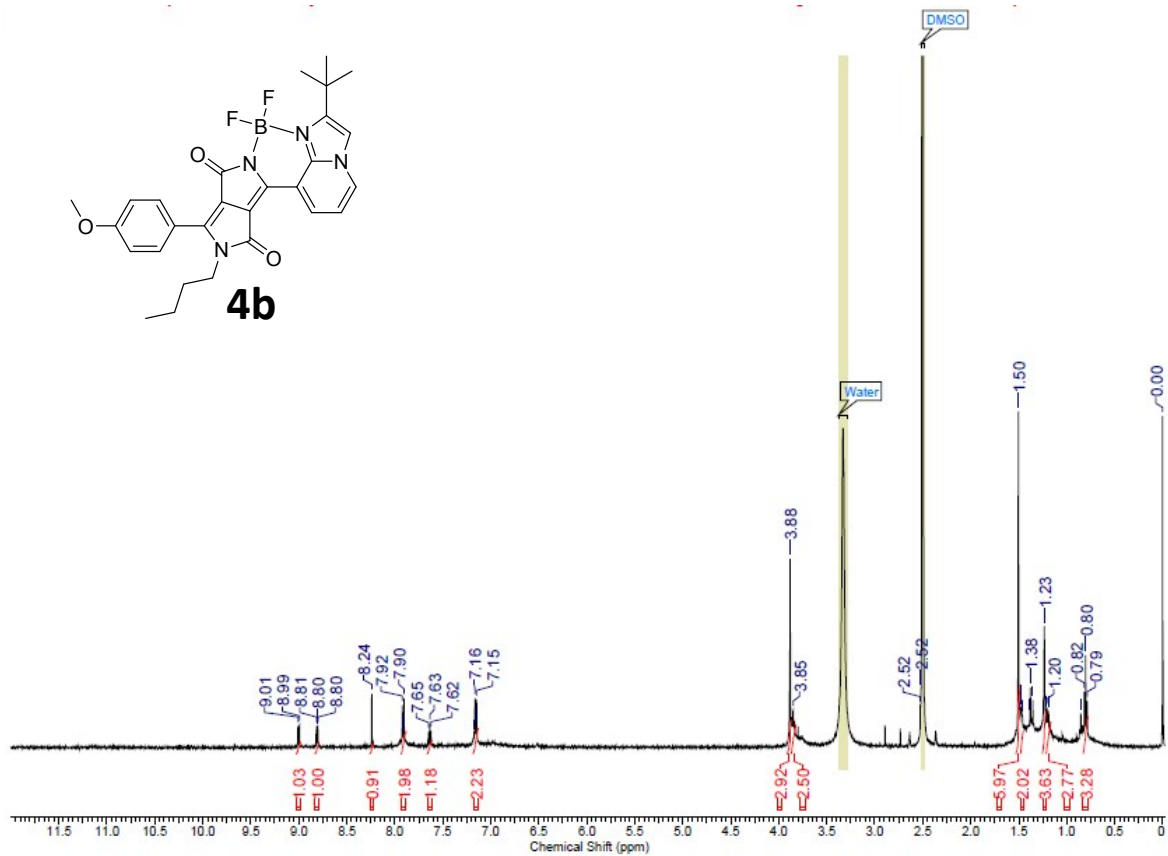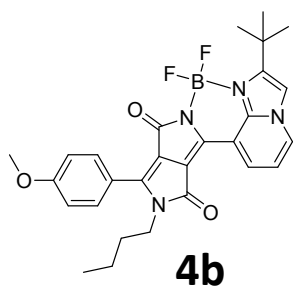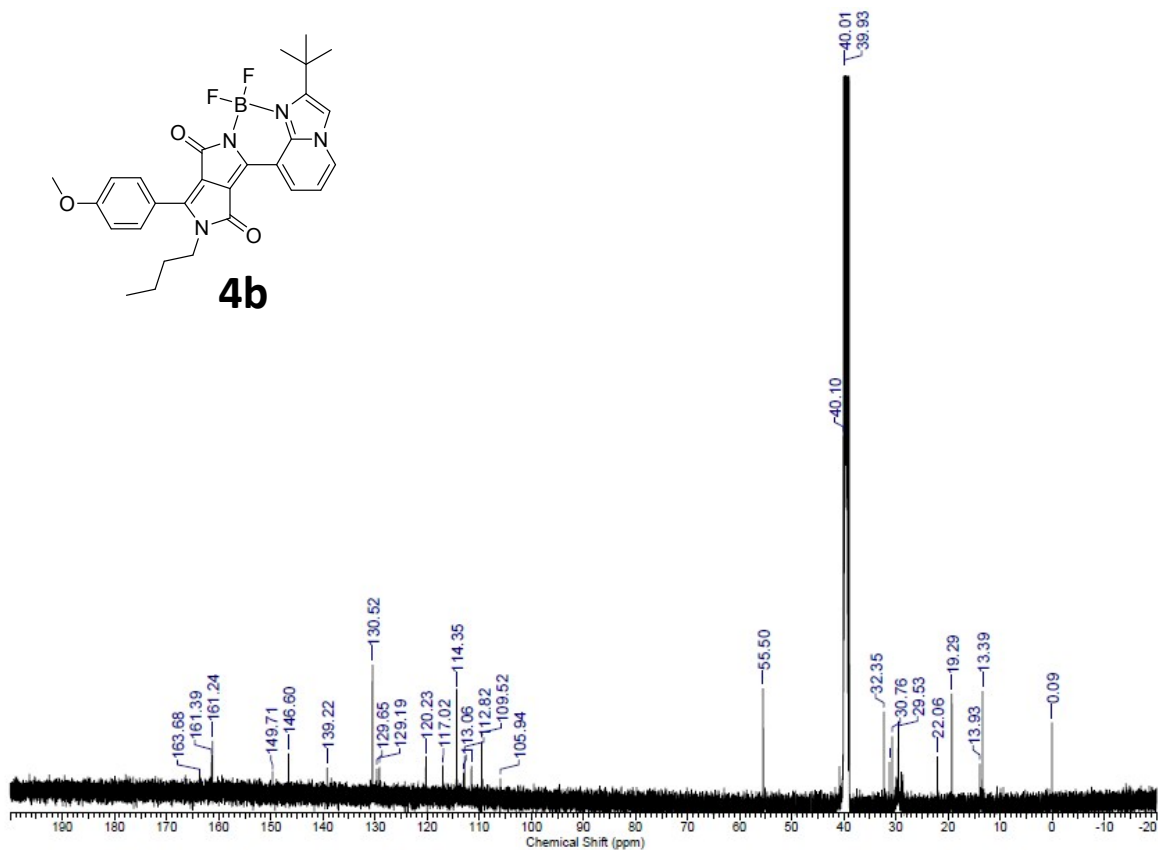

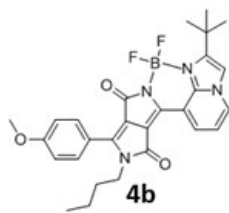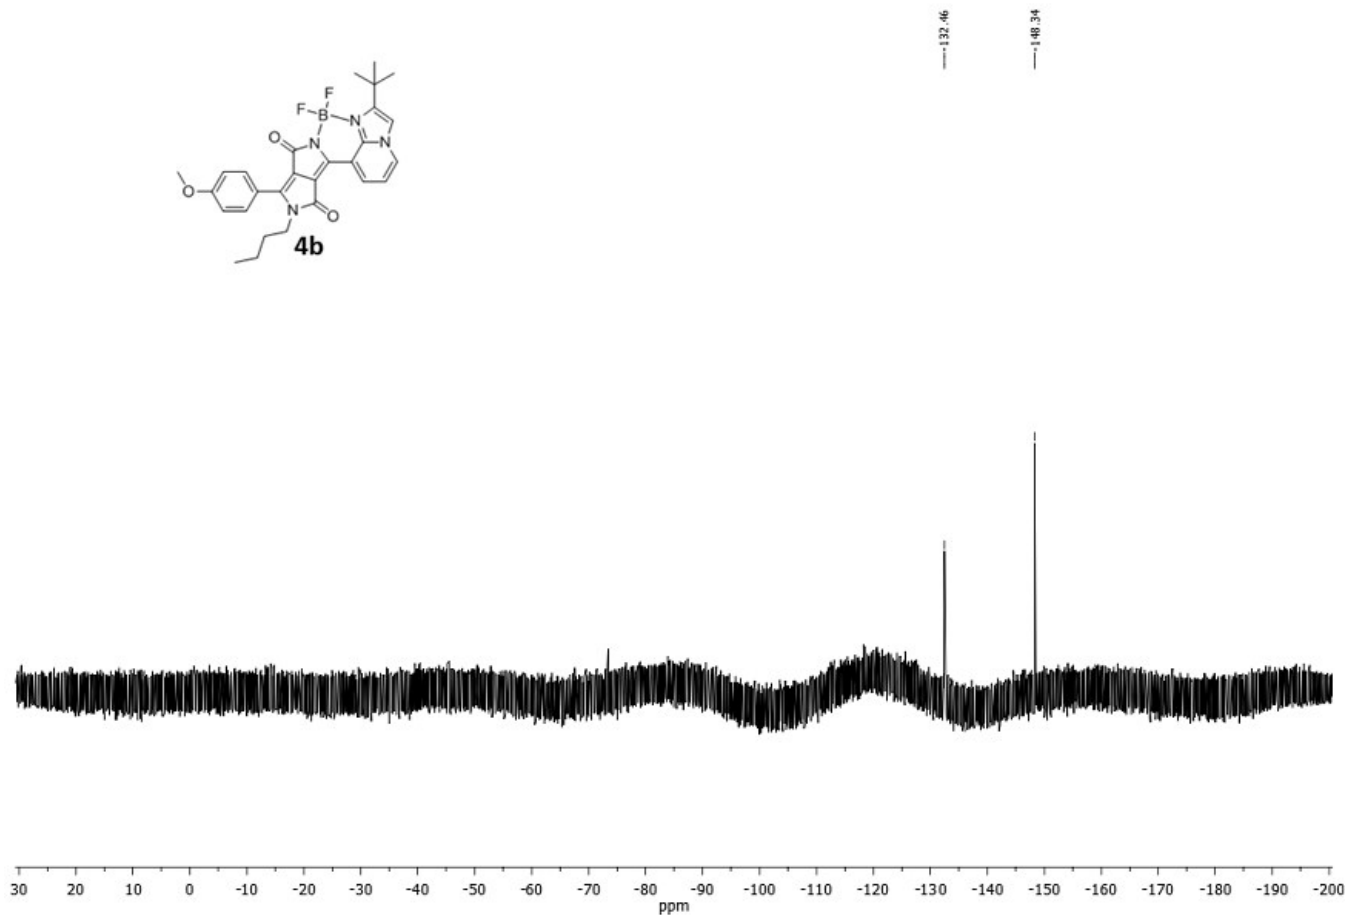

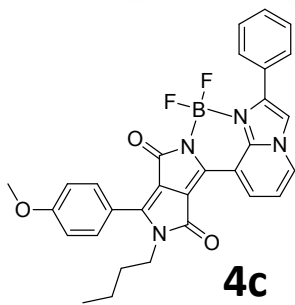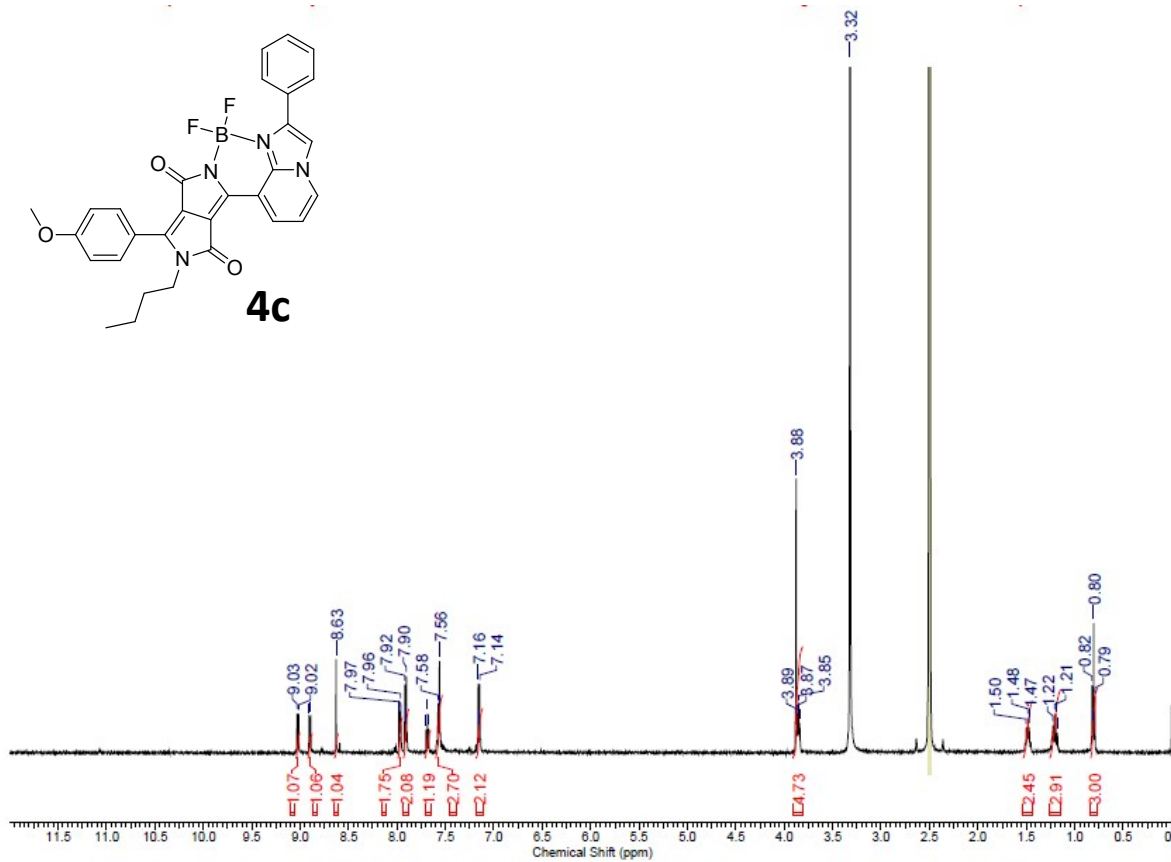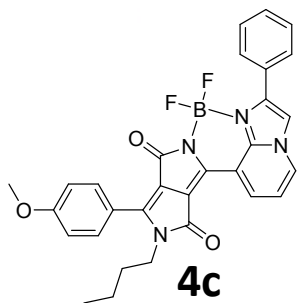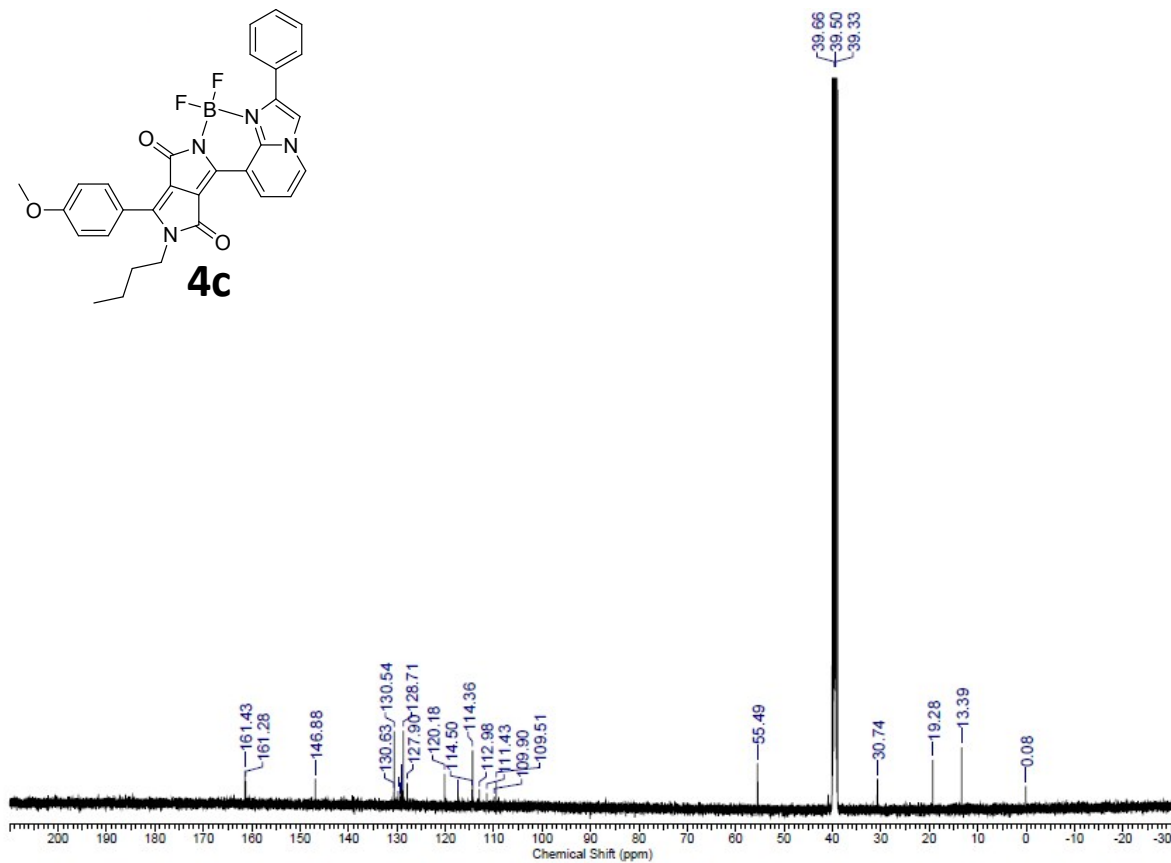

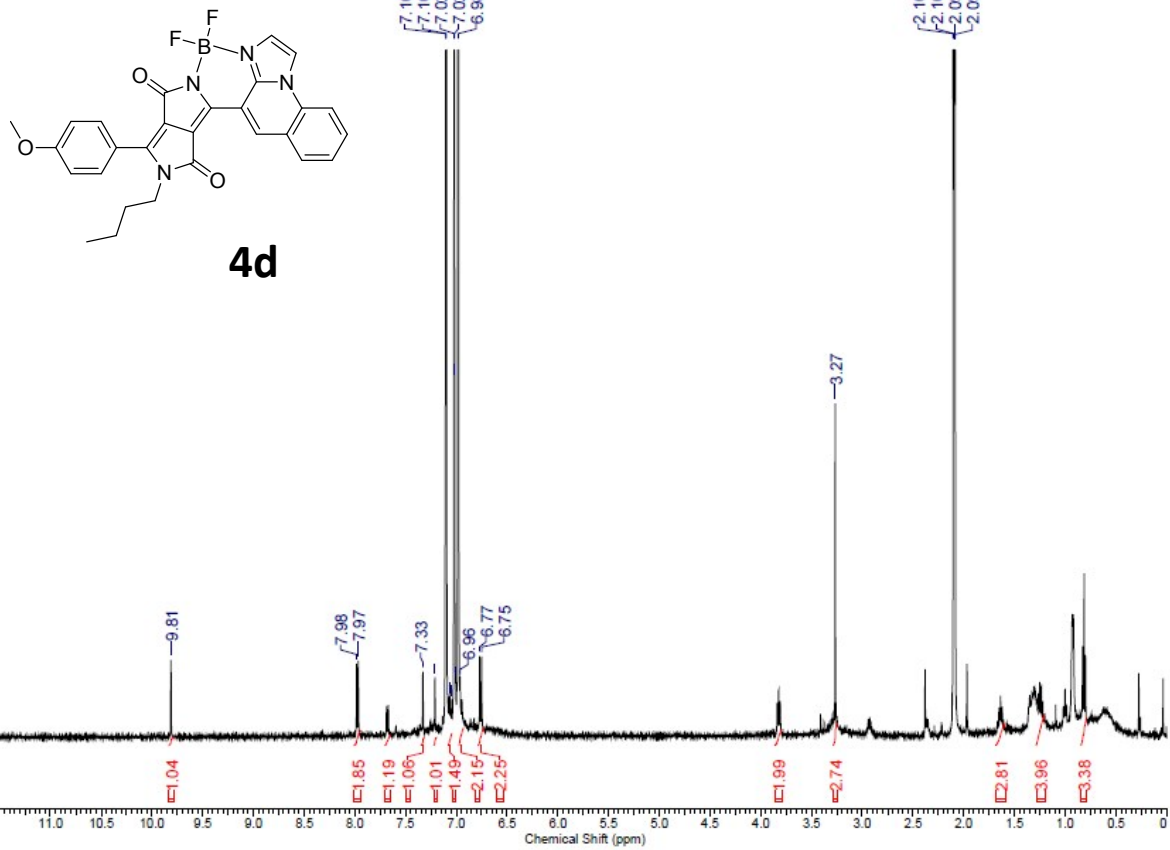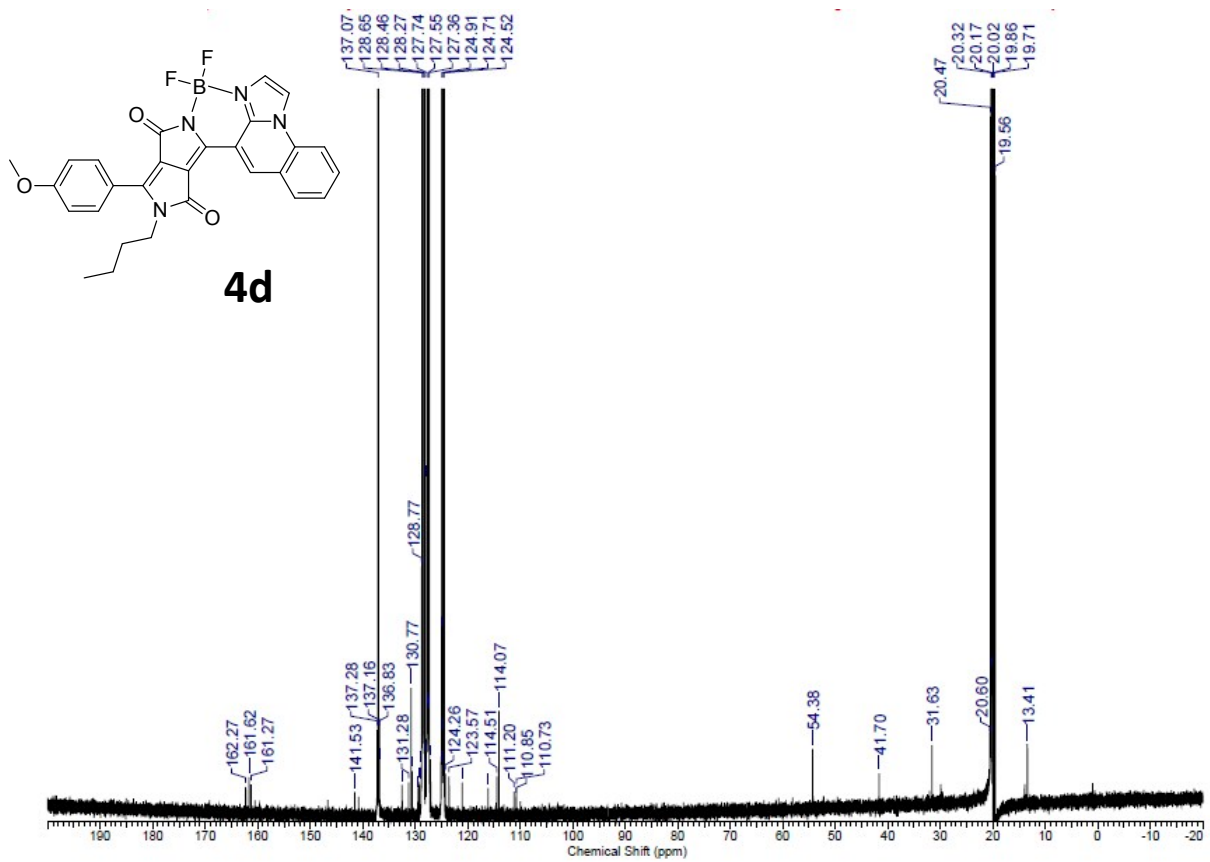

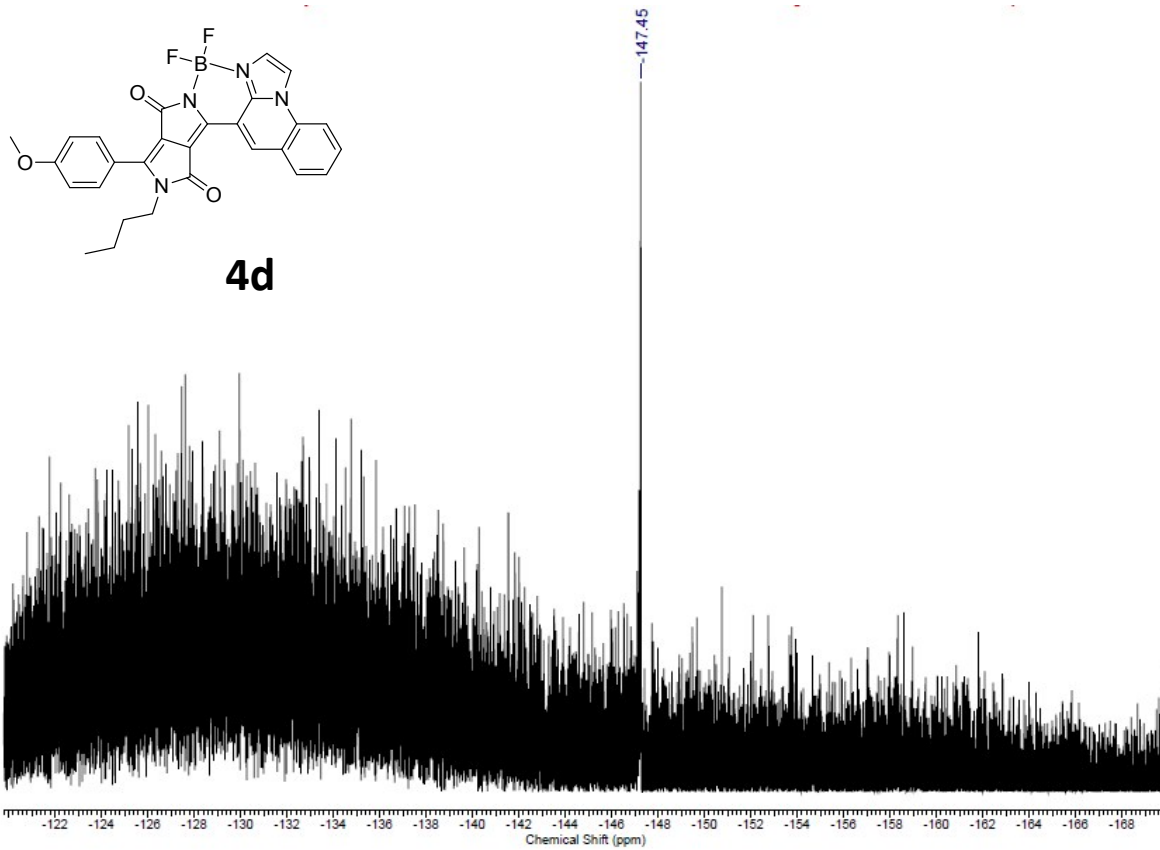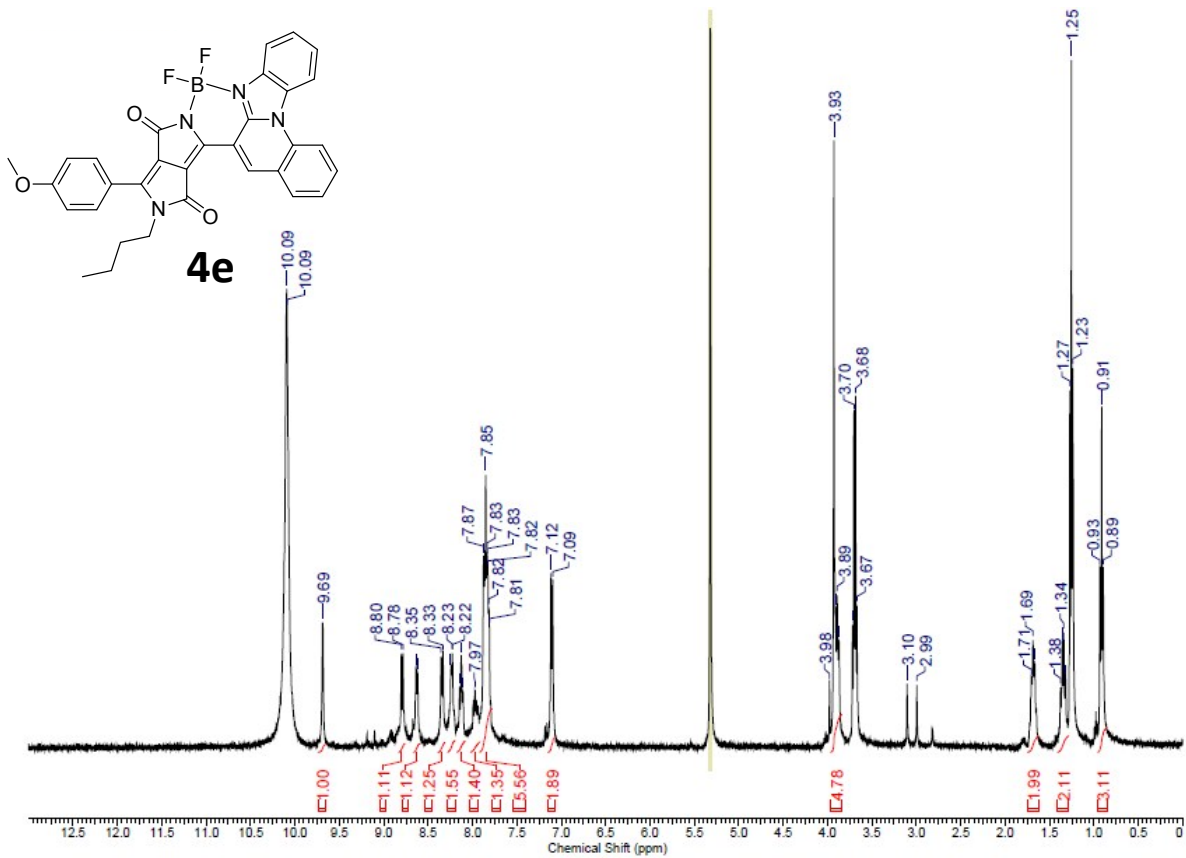

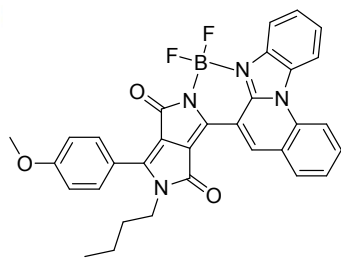

**4e**

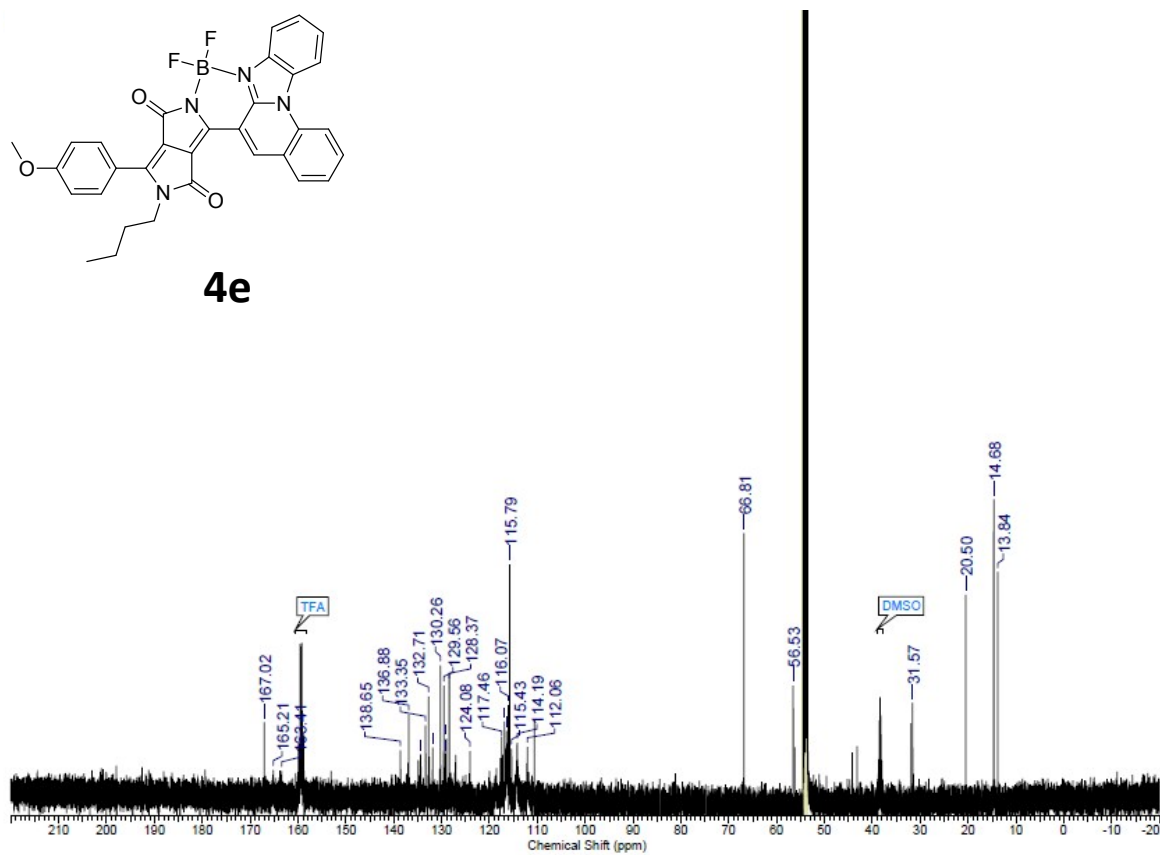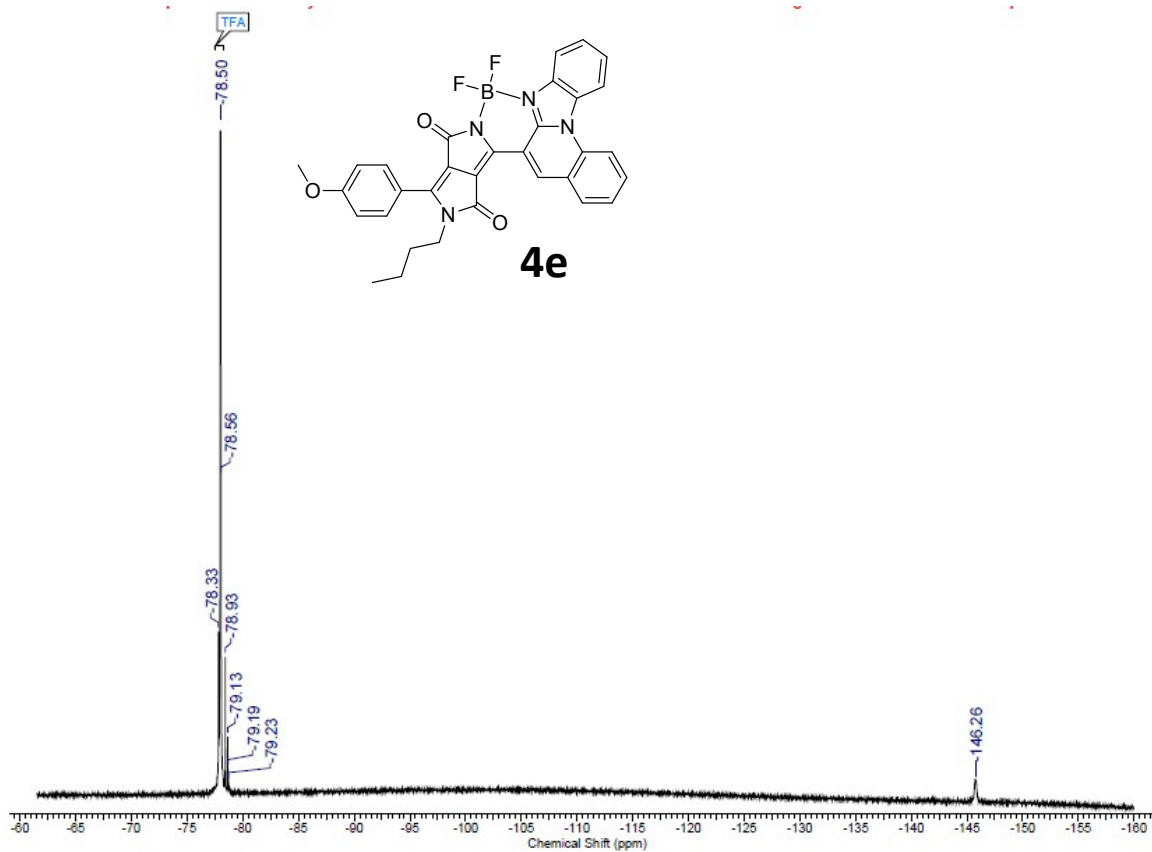

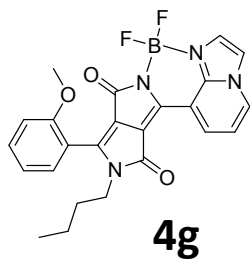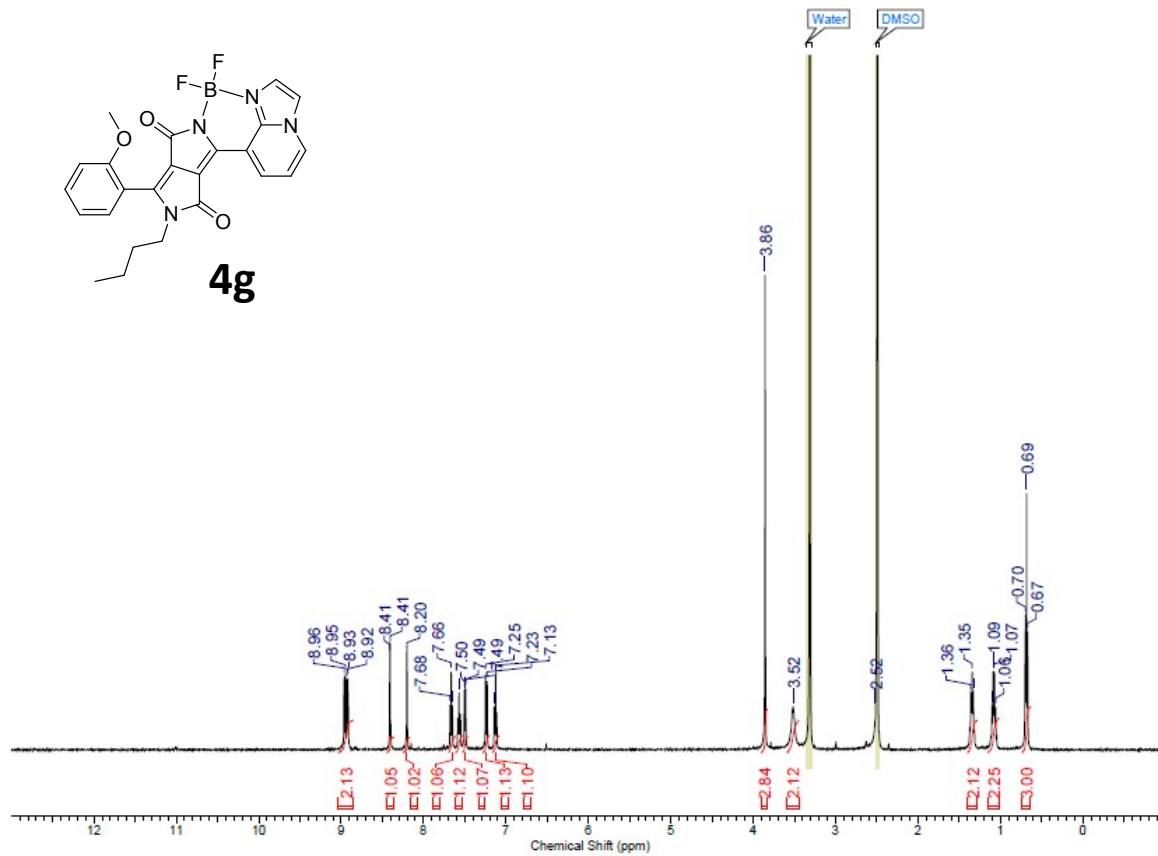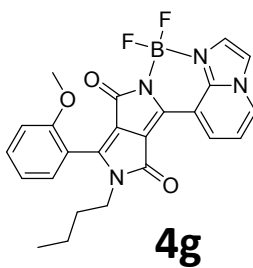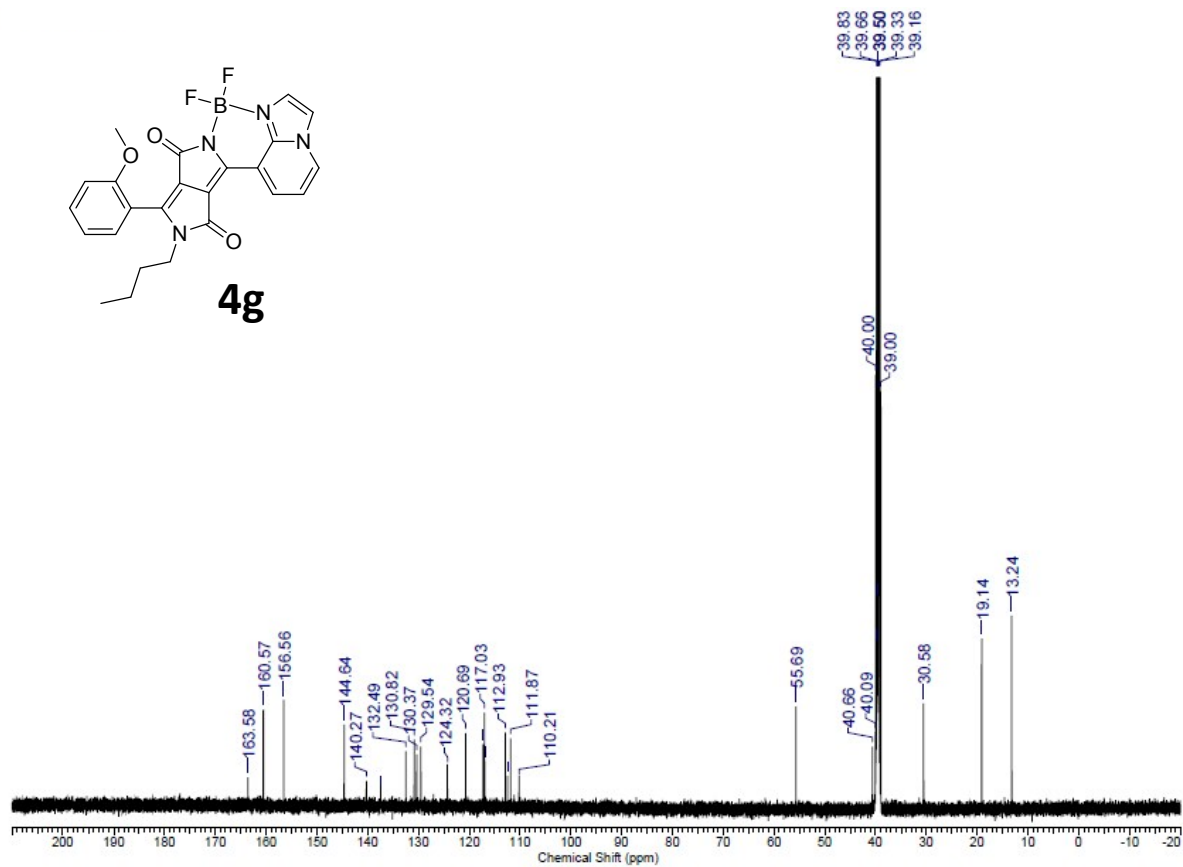



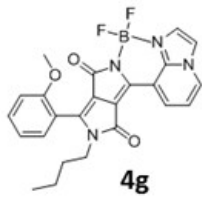

140.37

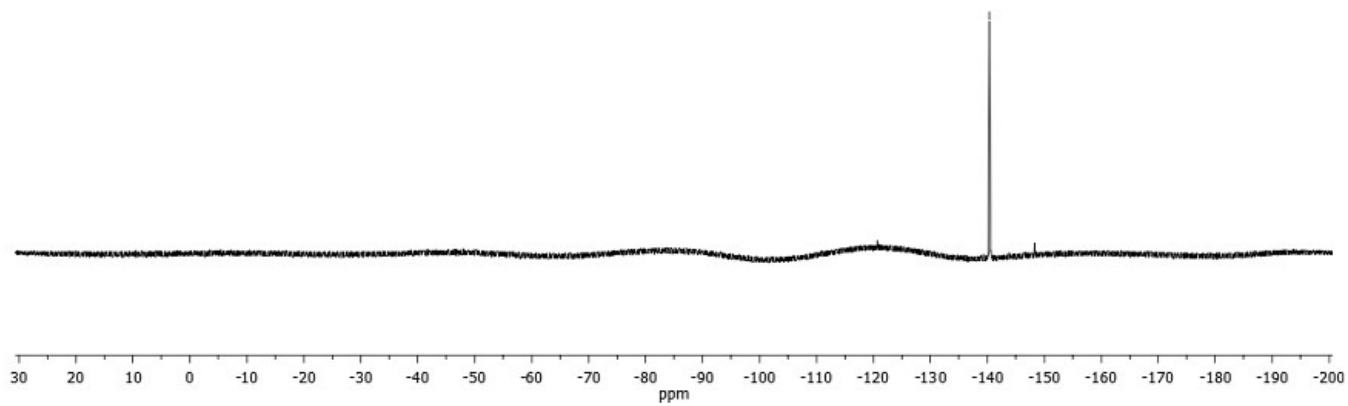

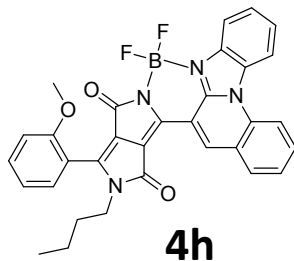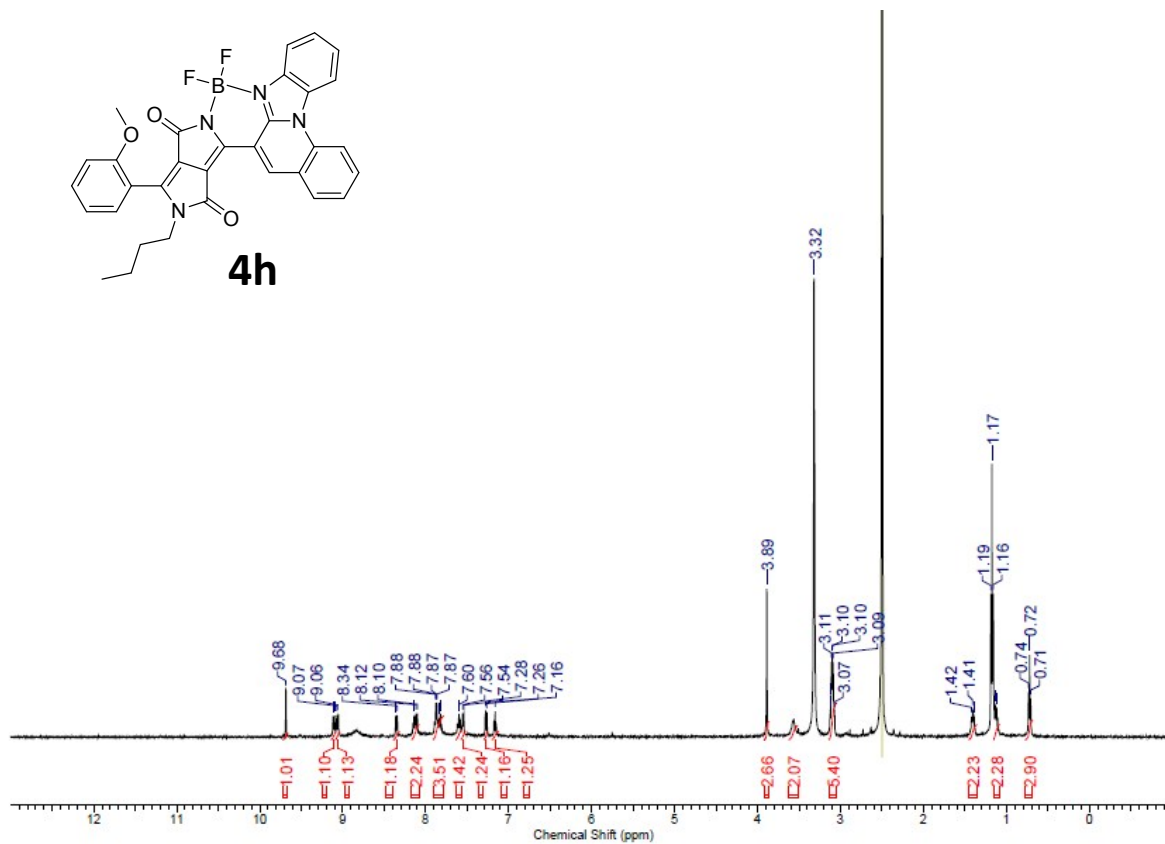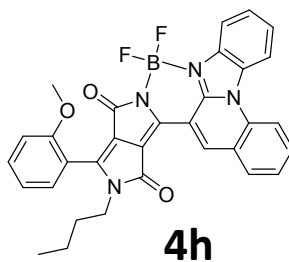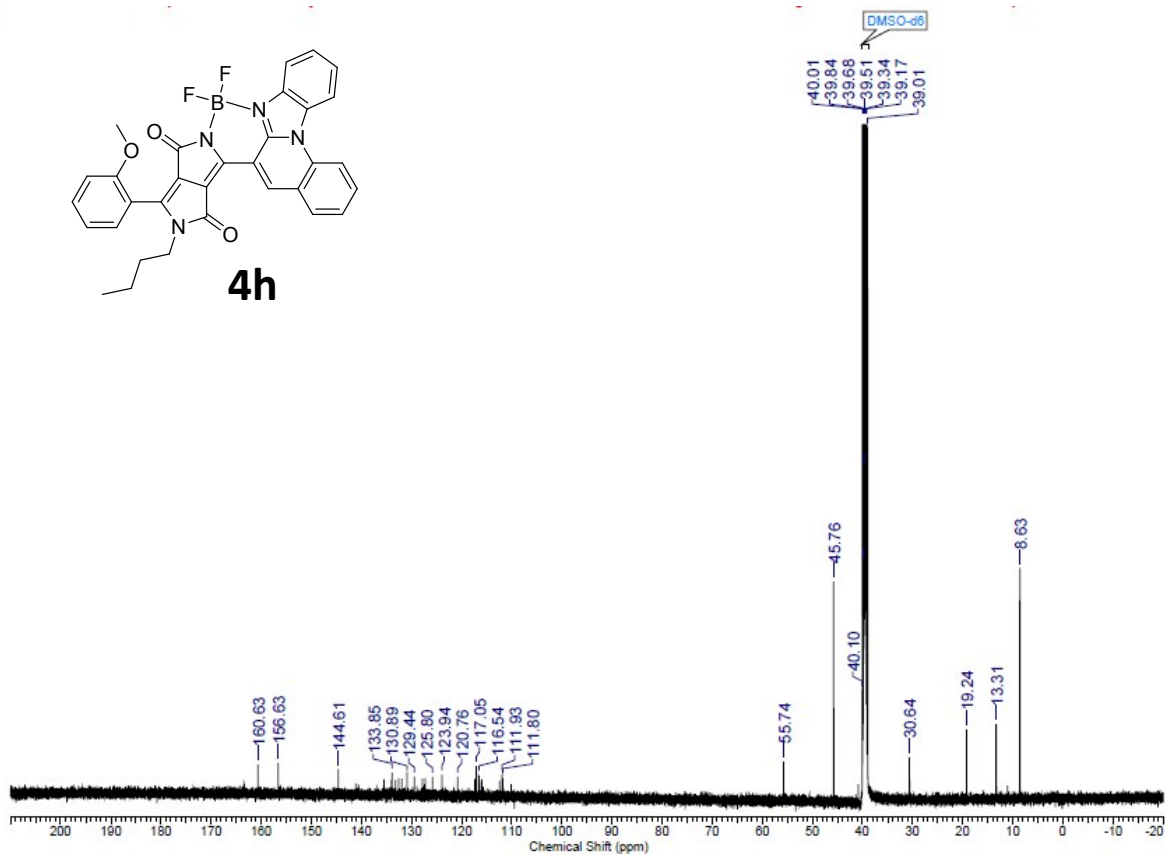

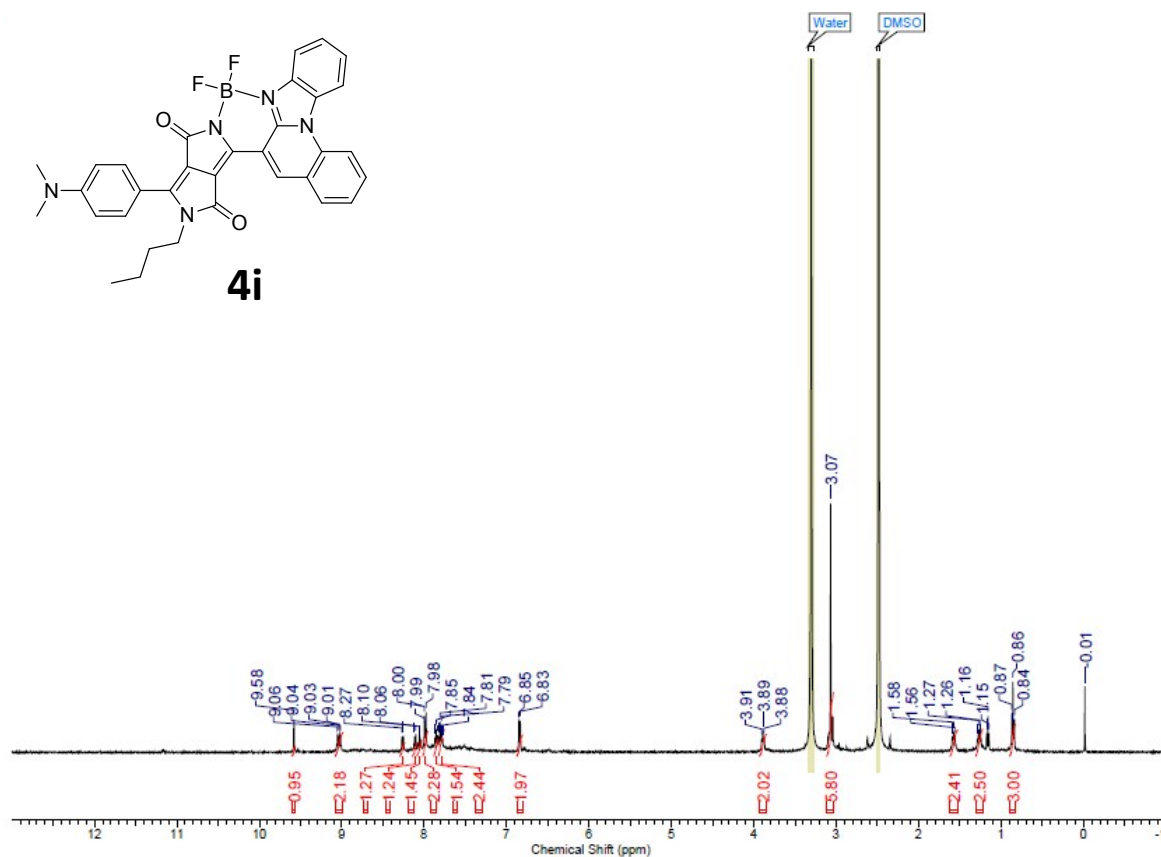

## Section S8: References

1. M. Pieczykolan, B. Sadowski and D. T. Gryko, *Angew. Chem. Int. Ed.*, 2020, ahead of press.
2. S. H. Reich, P. A. Sprengeler, G. G. Chiang, J. R. Appleman, J. Chen, J. Clarine, B. Eam, J. T. Ernst, Q. Han, V. K. Goel, E. Z. R. Han, V. Huang, I. N. J. Hung, A. Jemison, K. A. Jessen, J. Molter, D. Murphy, M. Neal, G. S. Parker, M. Shaghafi, S. Sperry, J. Staunton, C. R. Stumpf, P. A. Thompson, C. Tran, S. E. Webber, C. J. Wegerski, H. Zheng and K. R. Webster, *J. Med. Chem.*, 2018, **61**, 3516-3540.
3. N. D. Kushwaha, S. Mondal, R. Sharma and N. Kumar, *Asian J. Chem.*, 2017, **29**, 1495-1498.
4. B. S. Rane, M. A. Kazi, S. M. Bagul, D. P. Shelar, R. B. Toche and M. N. Jachak, *J. Fluoresc.*, 2010, **20**, 415-420.
5. Q. Cai, Z. Li, J. Wei, L. Fu, C. Ha, D. Pei and K. Ding, *Org. Lett.*, 2010, **12**, 1500-1503.
6. , APEX3 V2019, Bruker Nano, Inc., 2019; SAINT V2018.2040A, Bruker Nano, Inc., 2019; SADABS V2016/2012, Bruker Nano, Inc., 2019.
7. G. Sheldrick, *Acta Crystallographica Section A*, 2015, **71**, 3-8.
8. G. Sheldrick, *Acta Crystallographica Section C*, 2015, **71**, 3-8.
9. C. F. Macrae, I. J. Bruno, J. A. Chisholm, P. R. Edgington, P. McCabe, E. Pidcock, L. Rodriguez-Monge, R. Taylor, J. van de Streek and P. A. Wood, *J. Appl. Crystallogr.*, 2008, **41**, 466-470.
10. D. Jacquemin, A. Planchat, C. Adamo and B. Mennucci, *J. Chem. Theory Comput.*, 2012, **8**, 2359-2372.

11. M. J. Frisch, G. W. Trucks, H. B. Schlegel, G. E. Scuseria, M. A. Robb, J. R. Cheeseman, G. Scalmani, V. Barone, G. A. Petersson, H. Nakatsuji, X. Li, M. Caricato, A. V. Marenich, J. Bloino, B. G. Janesko, R. Gomperts, B. Mennucci, H. P. Hratchian, J. V. Ortiz, A. F. Izmaylov, J. L. Sonnenberg, Williams, F. Ding, F. Lipparini, F. Egidi, J. Goings, B. Peng, A. Petrone, T. Henderson, D. Ranasinghe, V. G. Zakrzewski, J. Gao, N. Rega, G. Zheng, W. Liang, M. Hada, M. Ehara, K. Toyota, R. Fukuda, J. Hasegawa, M. Ishida, T. Nakajima, Y. Honda, O. Kitao, H. Nakai, T. Vreven, K. Throssell, J. A. Montgomery Jr., J. E. Peralta, F. Ogliaro, M. J. Bearpark, J. J. Heyd, E. N. Brothers, K. N. Kudin, V. N. Staroverov, T. A. Keith, R. Kobayashi, J. Normand, K. Raghavachari, A. P. Rendell, J. C. Burant, S. S. Iyengar, J. Tomasi, M. Cossi, J. M. Millam, M. Klene, C. Adamo, R. Cammi, J. W. Ochterski, R. L. Martin, K. Morokuma, O. Farkas, J. B. Foresman and D. J. Fox, *Gaussian 16 Rev. B.01*, Wallingford, CT, 2016.
12. Y. Zhao and D. G. Truhlar, *Theor. Chem. Acc.*, 2008, **120**, 215-241.
13. B. Le Guennic and D. Jacquemin, *Acc. Chem. Res.*, 2015, **48**, 530-537.
14. J. Tomasi, B. Mennucci and R. Cammi, *Chem. Rev.*, 2005, **105**, 2999-3094.
15. P. M. Vérité, C. A. Guido and D. Jacquemin, *PCCP*, 2019, **21**, 2307-2317.
